# Supplementary material for: Ancient proteins resolve the evolutionary history of Darwin’s South American ungulates
Source: Springer Nature journal article supplement (doi:10.1038/nature14249), 2015-03-18

| Searched position | Chain | Chain position | <i>Macrauchenia</i><br>a_AA | <i>Toxodon</i><br>AA | <i>Macrauchenia</i> (MS/MS<br>run - Scan number) | <i>Toxodon</i> (MS/MS run -<br>scan number) |
|-------------------|-------|----------------|-----------------------------|----------------------|--------------------------------------------------|---------------------------------------------|
| 154               | α1    | 137            | A                           | P                    | York15 - 1552                                    | York13 - 2019                               |
| 155               | α1    | 138            | P                           | T                    | York15 - 1552                                    | York13 - 2019                               |
| 337               | α1    | 320            | S                           | A                    | York15 - 7760                                    | York13 - 5848                               |
| 463               | α1    | 446            | P                           | S                    | York15 - 5381                                    | York13 - 3777                               |
| 473               | α1    | 456            | P                           | Q                    | MLP2012.12 - 9550                                | MLP2012.04 - 5739                           |
| 595               | α1    | 578            | A                           | S                    | York15 - 4842                                    | York13 - 1160                               |
| 778               | α1    | 761            | A                           | S                    | York15 - 1354                                    | York12 - 7166                               |
| 839               | α1    | 822            | V                           | L                    | MLP2012.12 - 8119                                | York12 - 9260                               |
| 878               | α1    | 861            | T                           | A                    | York15 - 1411                                    | York12 - 5410                               |
| 920               | α1    | 903            | V                           | T                    | York15 - 8957                                    | York12 - 5327                               |
| 926               | α1    | 909            | T                           | A                    | York15 - 2530                                    | York13 - 1866                               |
| 959               | α1    | 942            | T                           | P                    | MLP2012.12 - 10336                               | York13 - 9342                               |
| 964               | α1    | 947            | A                           | S                    | MLP2012.12 - 10336                               | York13 - 9342                               |
| 971               | α1    | 954            | S                           | A                    | York15 -2281                                     | York13 - 3181                               |
| 1016              | α1    | 999            | V                           | R                    | York15 - 7645                                    | York13 - 11392                              |
| 1024              | α1    | 1007           | P                           | A                    | York15 - 7645                                    | York13 - 11392                              |
| 1285              | α2    | 216            | P                           | T                    | MLP2012.12 - 2029                                | York12 - 11741                              |
| 1332              | α2    | 263            | T                           | S                    | York15 - 3754                                    | York12 - 3252                               |
| 1354              | α2    | 285            | S                           | A                    | MLP2012.12 - 2051                                | York13 - 2187                               |
| 1369              | α2    | 300            | A                           | T                    | York15 - 6287                                    | York13 - 5862                               |
| 1405              | α2    | 336            | S                           | T                    | MLP2012.12 - 17320                               | York13 - 2329                               |
| 1438              | α2    | 369            | V                           | I                    | York15 - 5550                                    | York13 - 6192                               |
| 1447              | α2    | 378            | A                           | V                    | York15 - 9831                                    | York13 - 10735                              |
| 1459              | α2    | 390            | A                           | T                    | York15 - 15945                                   | York13 - 8043                               |
| 1546              | α2    | 477            | A                           | V                    | MLP2012.12 - 8835                                | York12 - 2659                               |
| 1579              | α2    | 510            | A                           | V                    | York15 - 5533                                    | York13 - 6223                               |
| 1599              | α2    | 530            | A                           | N                    | MLP2012.12 - 22530                               | York13 - 1702                               |
| 1605              | α2    | 536            | V                           | N                    | MLP2012.12 - 22530                               | York12 - 9194                               |
| 1606              | α2    | 537            | V                           | L                    | MLP2012.12 - 22530                               | York12 - 9194                               |
| 1609              | α2    | 540            | P                           | I                    | MLP2012.12 - 22530                               | York12 - 9194                               |
| 1632              | α2    | 563            | P                           | G                    | York15 - 4801                                    | York12 - 4408                               |
| 1660              | α2    | 591            | V                           | I                    | York15 - 4047                                    | York13 - 4606                               |
| 1740              | α2    | 671            | S                           | A                    | York15 - 5067                                    | MLP2012.04 - 8866                           |
| 1810              | α2    | 741            | A                           | S                    | York15 - 5892                                    | York13 - 8479                               |
| 1818              | α2    | 749            | P                           | L                    | York15 - 5892                                    | York13 - 8479                               |
| 1828              | α2    | 759            | N                           | A                    | MLP2012.12 - 25311                               | MLP2012.04 - 15292                          |
| 1831              | α2    | 762            | A                           | P                    | MLP2012.12 - 25311                               | MLP2012.04 - 15292                          |
| 1836              | α2    | 767            | A                           | L                    | MLP2012.12 - 25311                               | MLP2012.04 - 15292                          |
| 1839              | α2    | 770            | I                           | T                    | MLP2012.12 - 25311                               | MLP2012.04 - 15292                          |
| 1870              | α2    | 801            | V                           | L                    | York15 - 12821                                   | York13 - 13872                              |
| 1893              | α2    | 824            | S                           | N                    | York15 - 4592                                    | York13 - 3942                               |
| 1963              | α2    | 894            | V                           | A                    | York15 - 5985                                    | York13 - 5244                               |
| 2025              | α2    | 956            | S                           | A                    | York15 - 3831                                    | York13 - 5729                               |
| 2038              | α2    | 969            | T                           | S                    | York15 - 3831                                    | York13 - 5729                               |
| 2052              | α2    | 983            | S                           | T                    | York15 - 6317                                    | York13 - 5316                               |

The column "Searched" is only used for data matching purposes in PEAKS, and is composed of full α1 and α2, concatenated, and with telopeptide

Intensity (%) **p** **G** **A** **p** **G** **P** **A** **GA** **R**

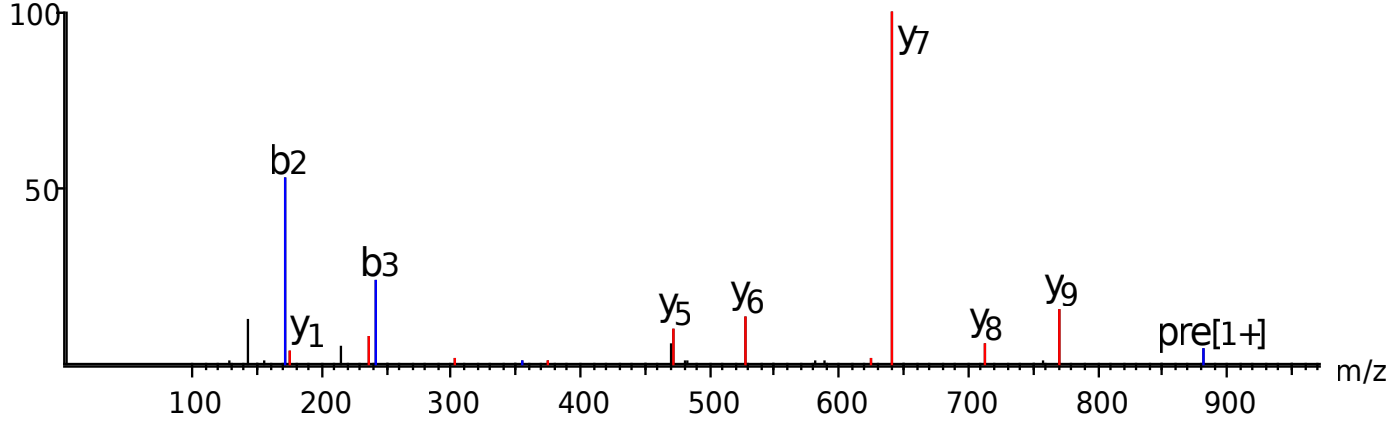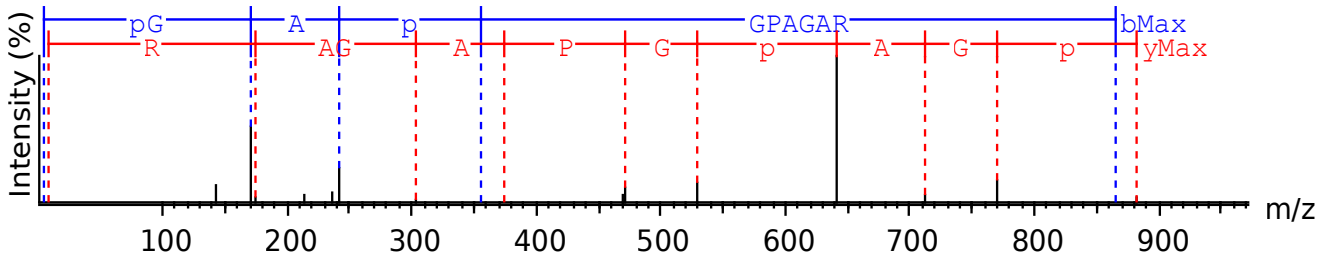

Intensity (%) **p** **G** **P** **T** **G** **P** **A** **GA** **R**

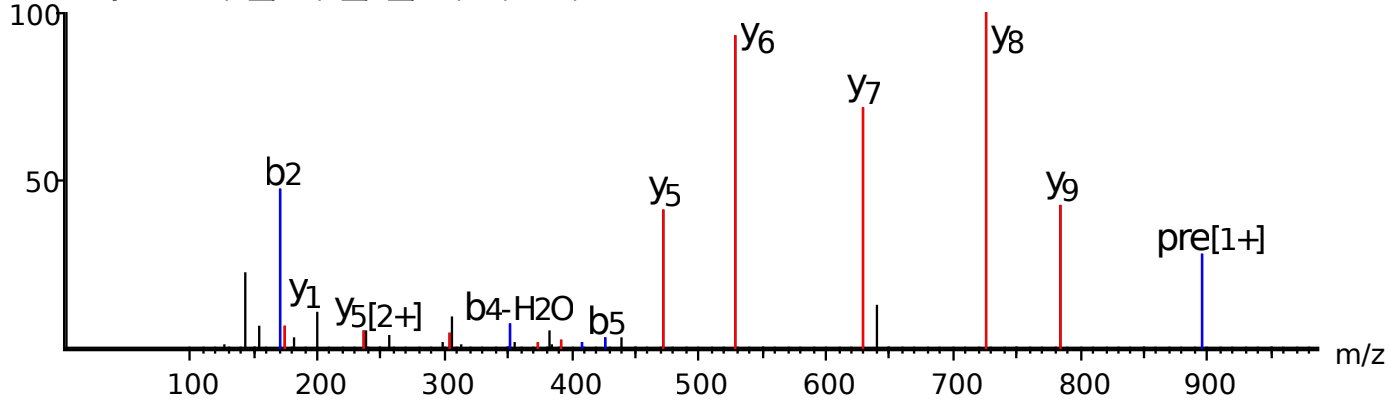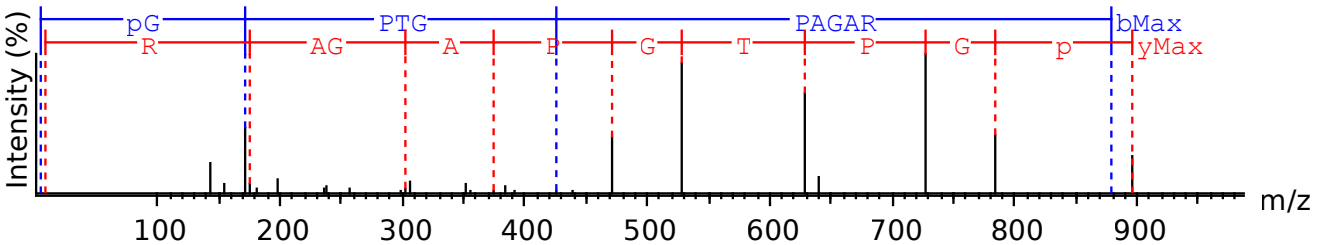

Col1α1 320

*Macrauchenia* sp.

York15 - 7760

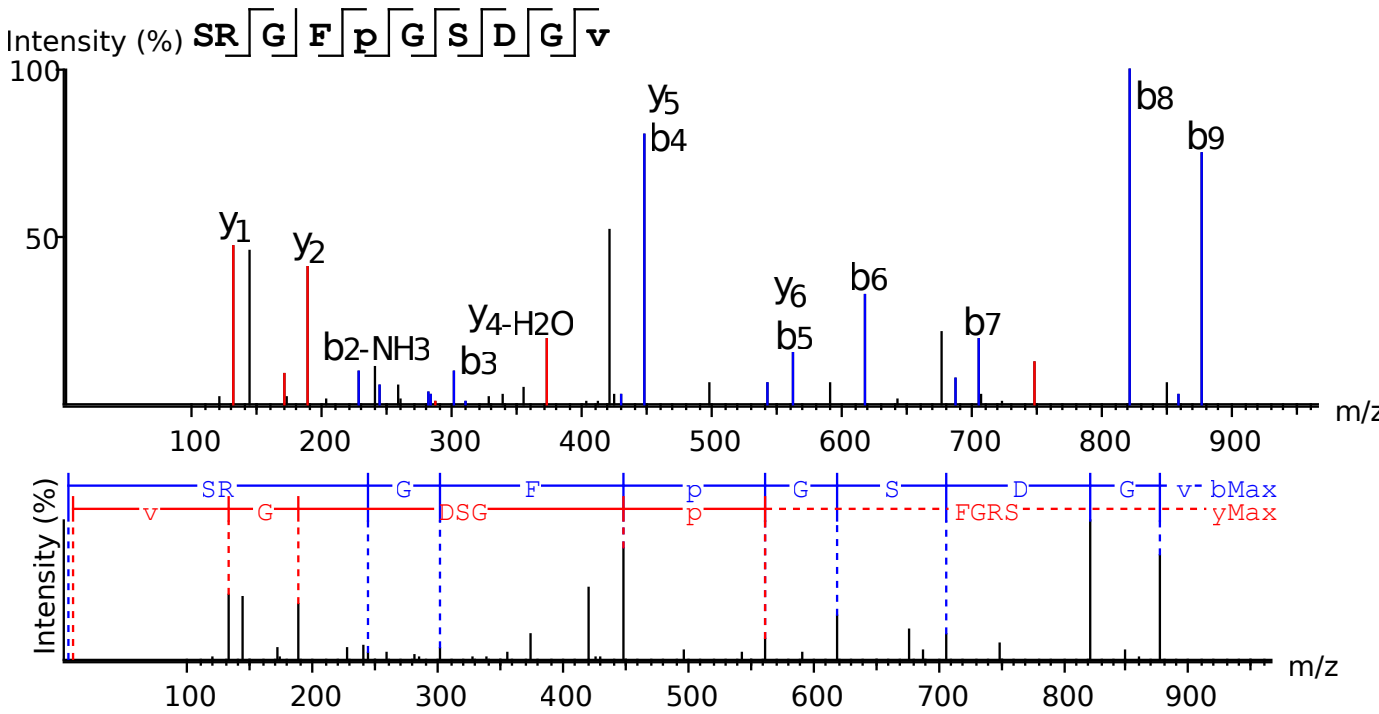

*Toxodon* sp.

York13 - 5848

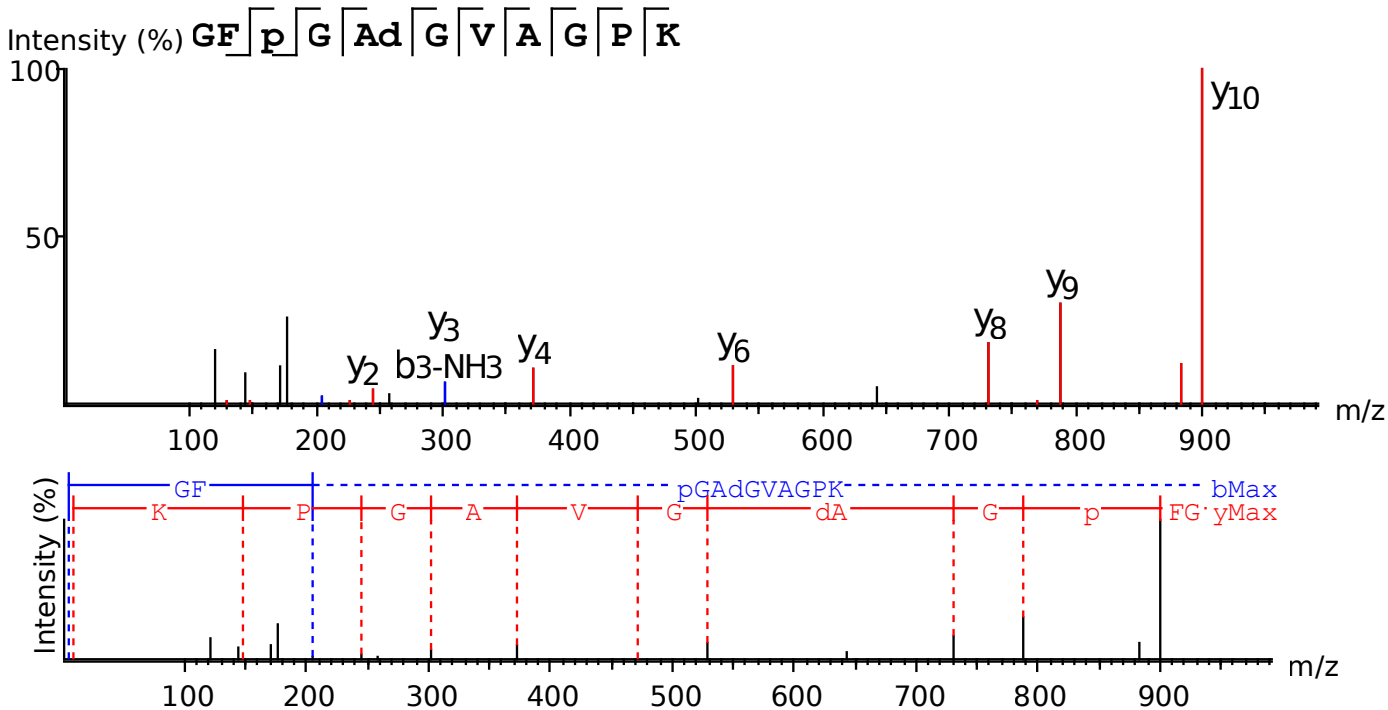

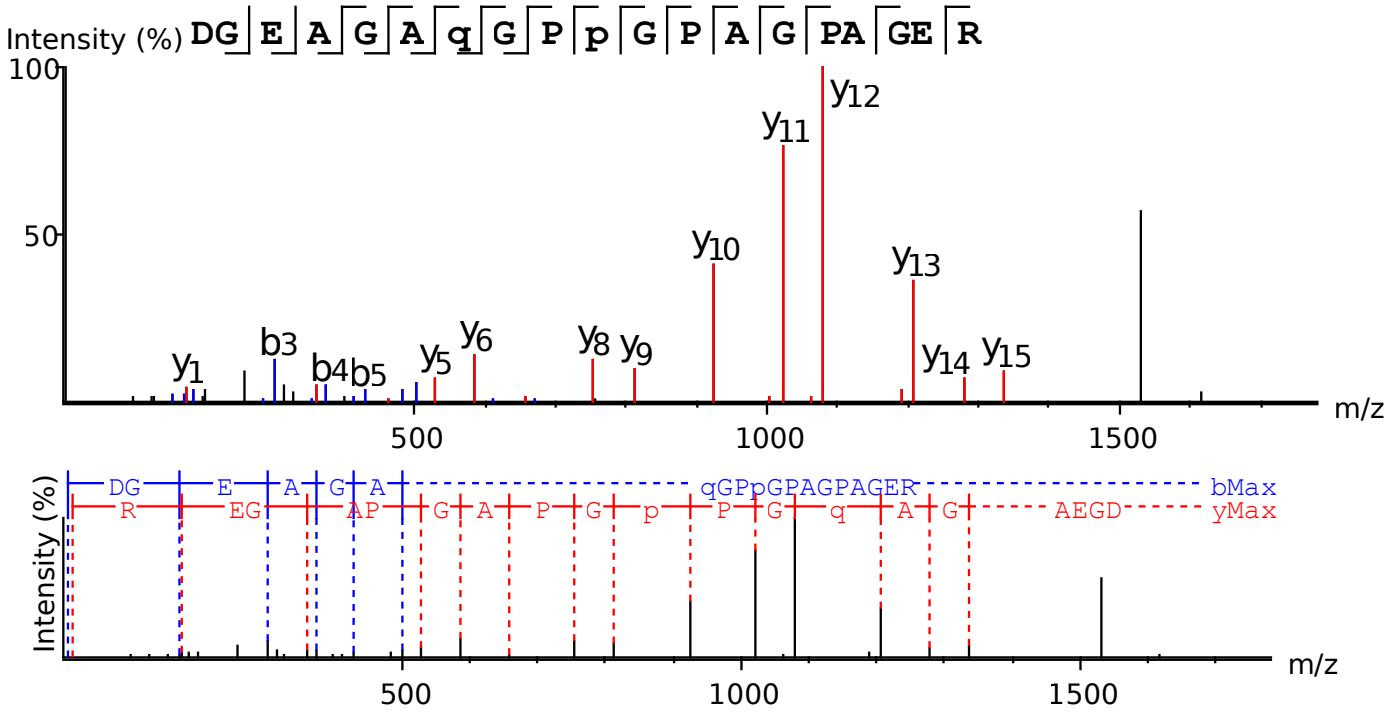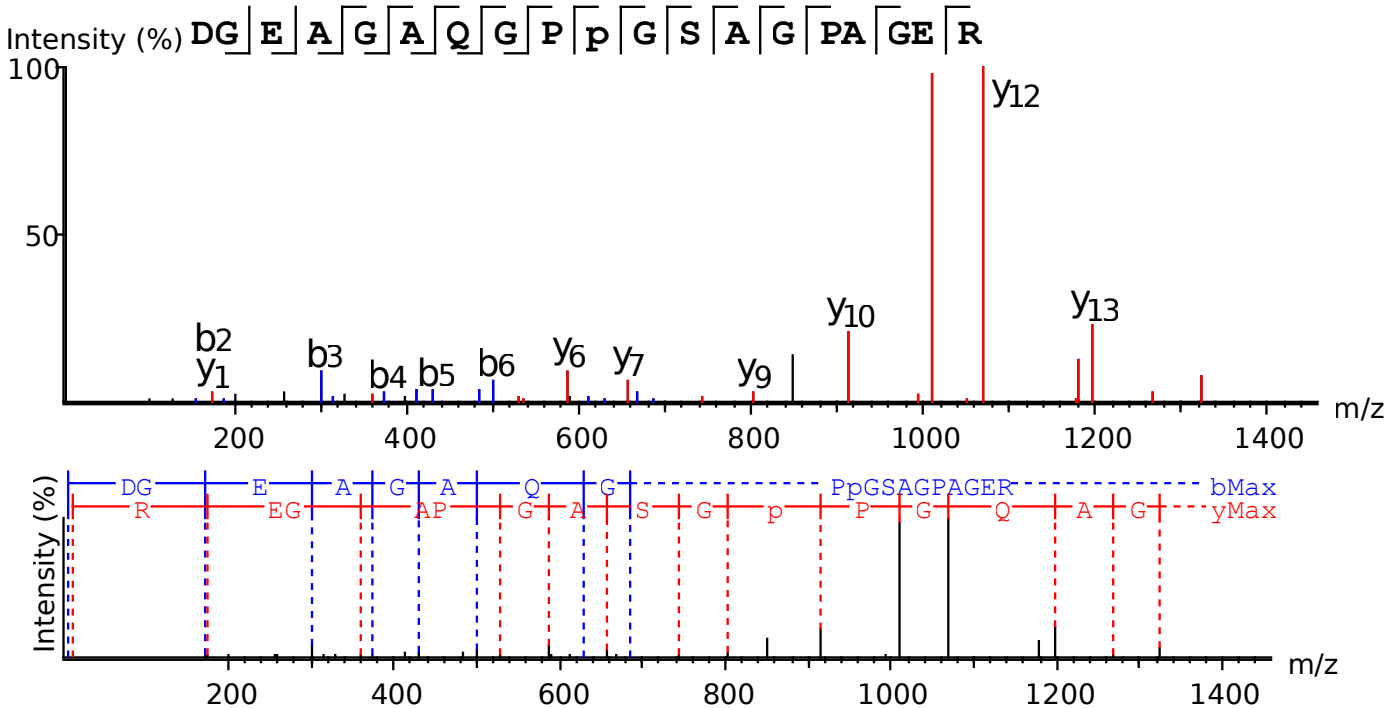

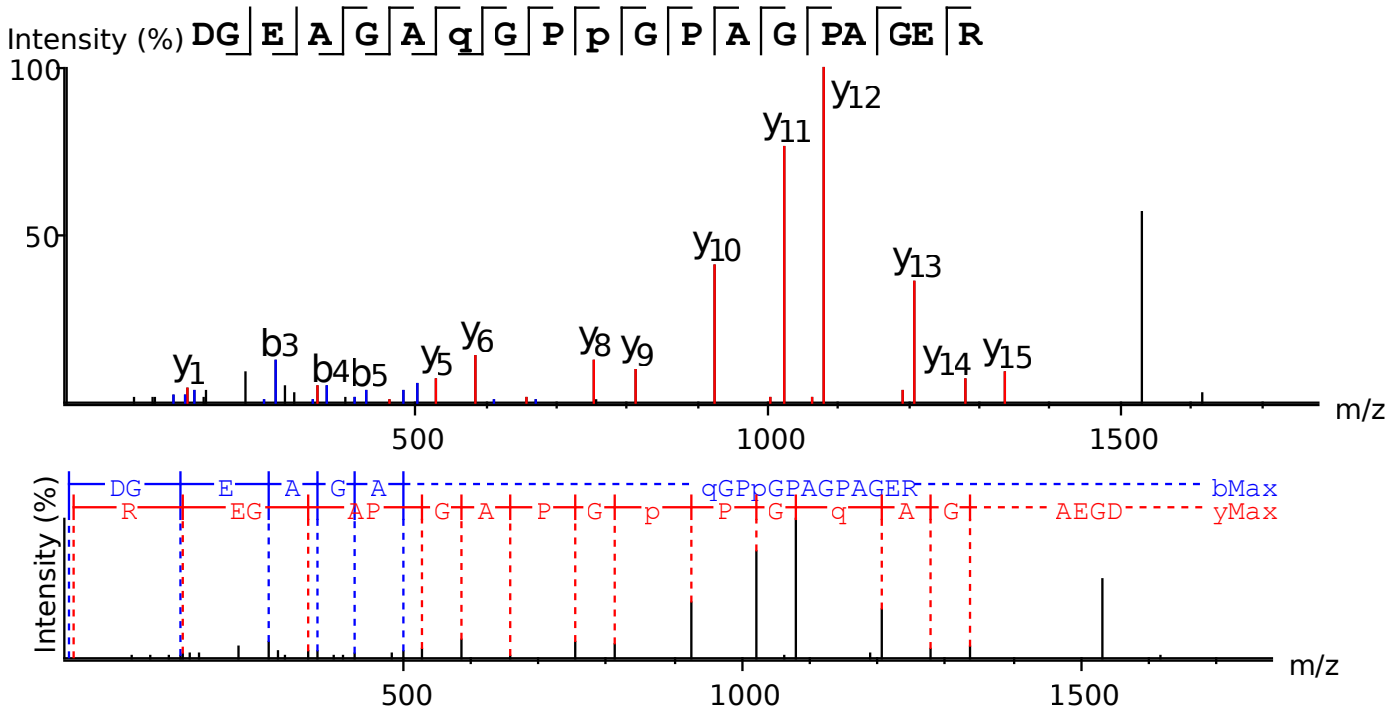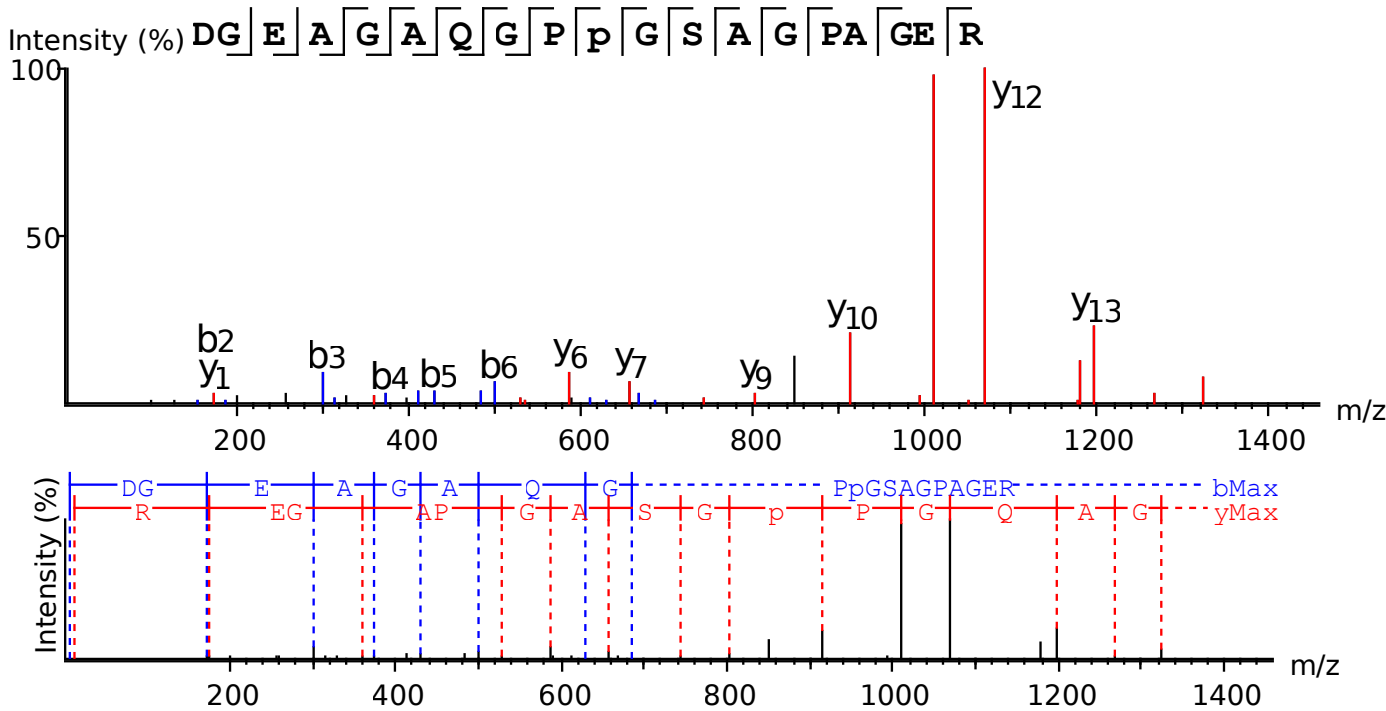

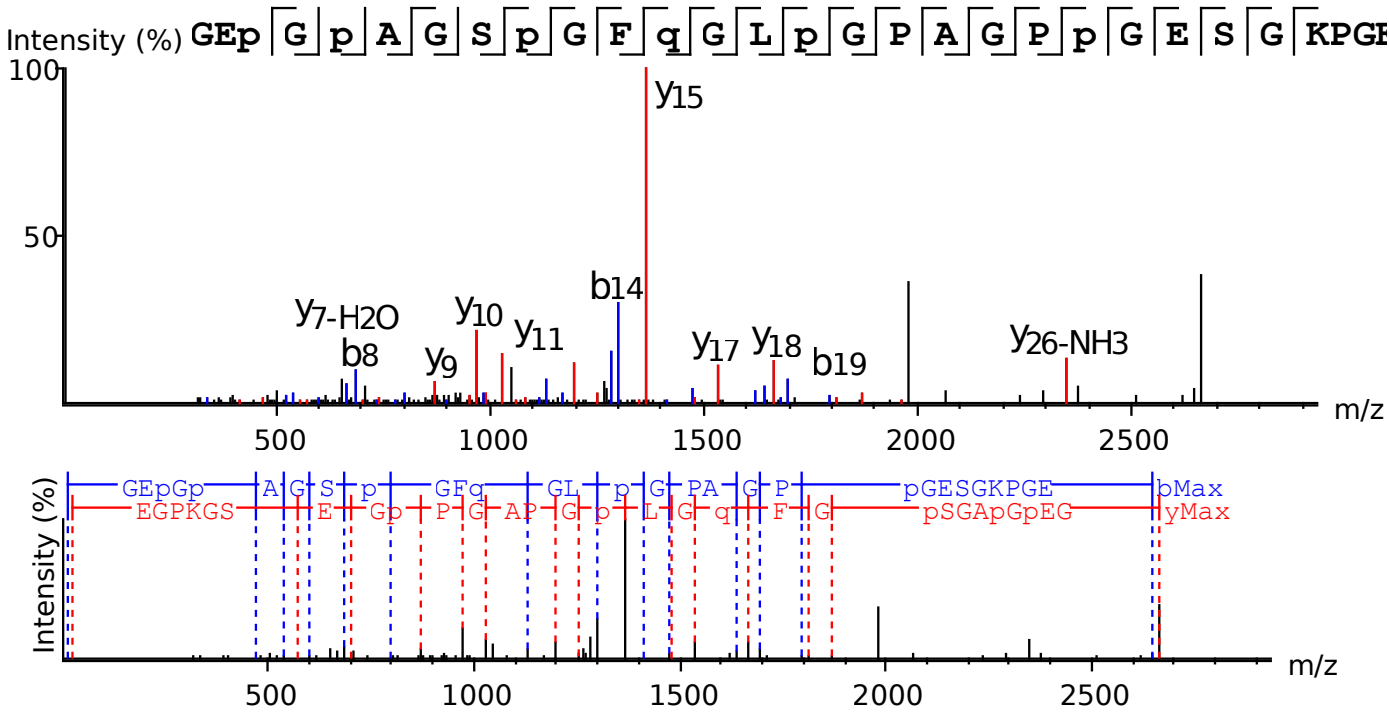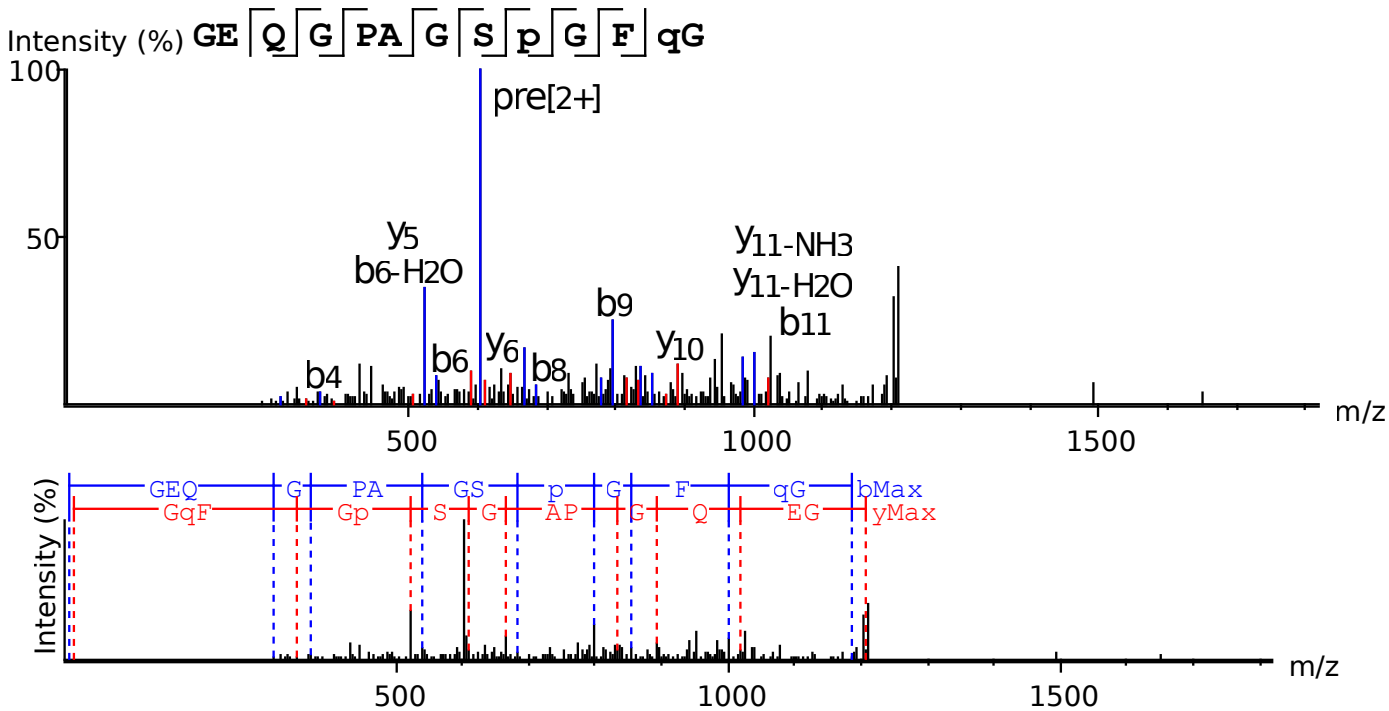

Col1α1 578

*Macrauchenia* sp.

York15 - 4842

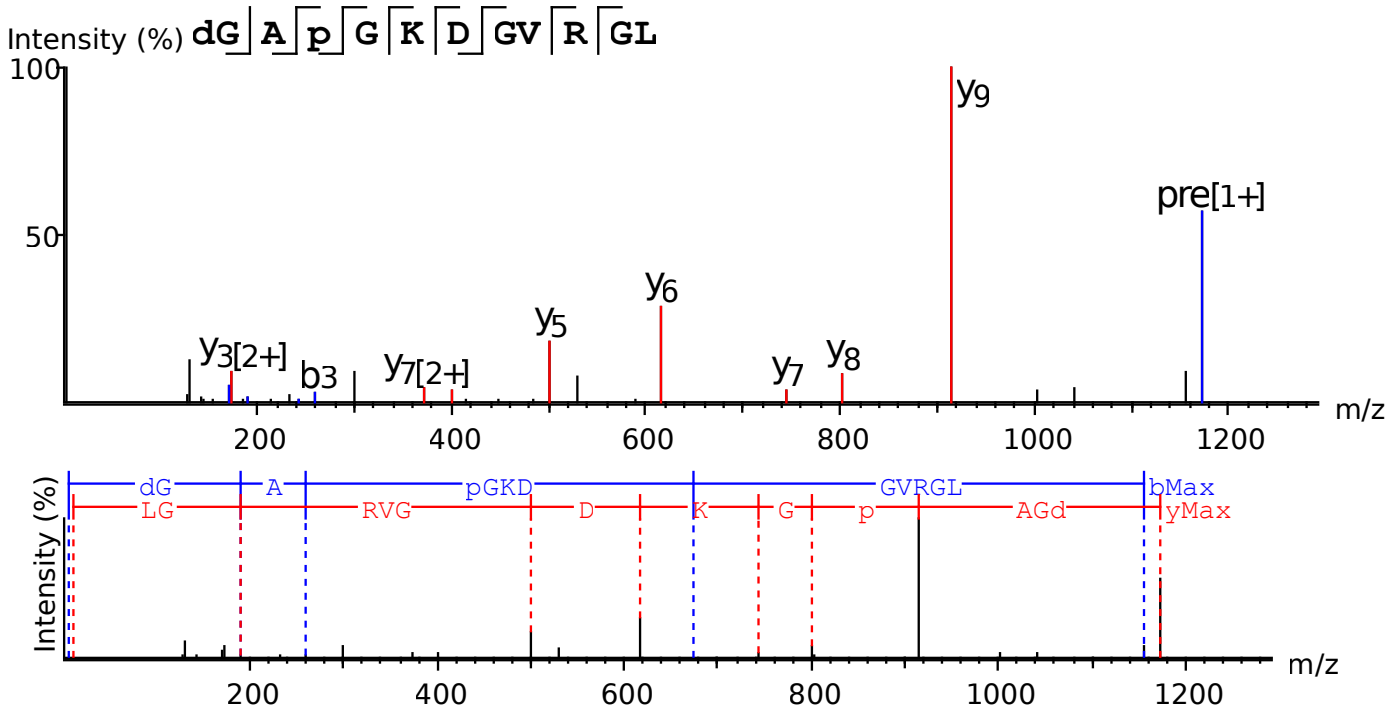

*Toxodon* sp.

York13 - 1160

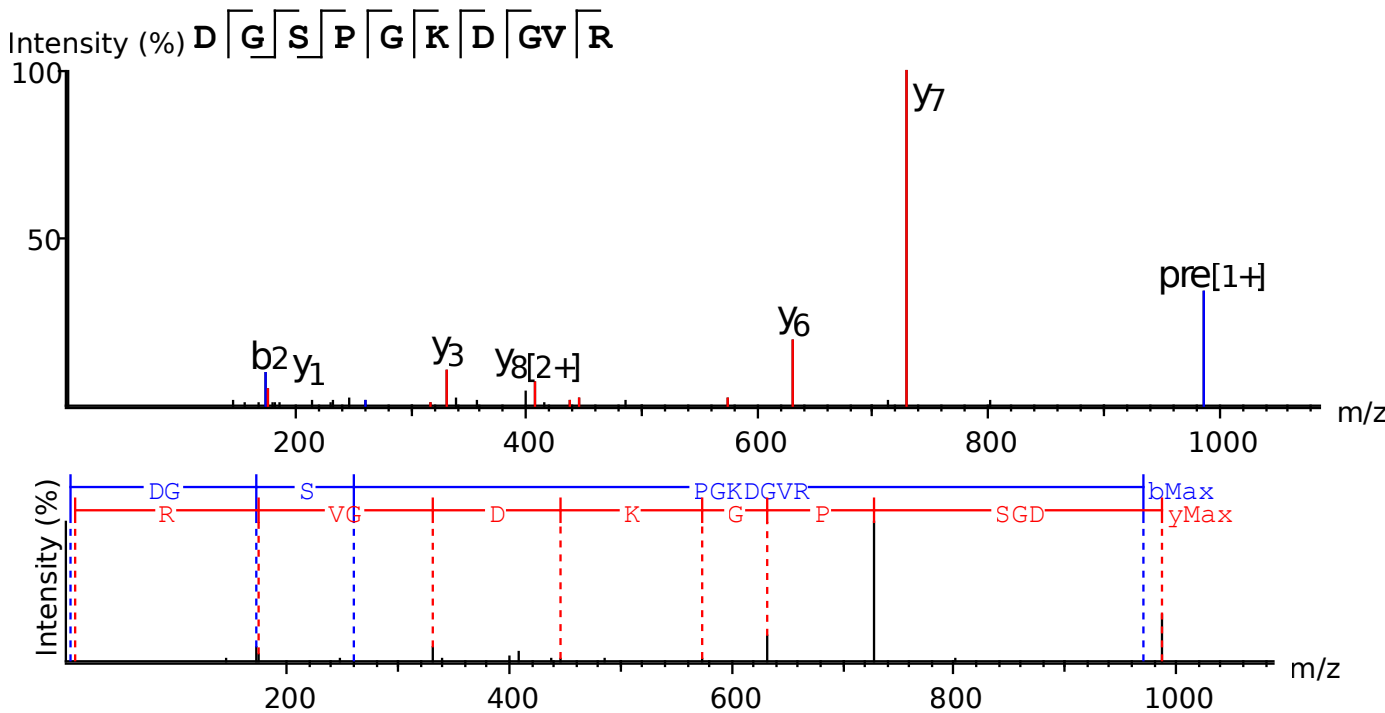

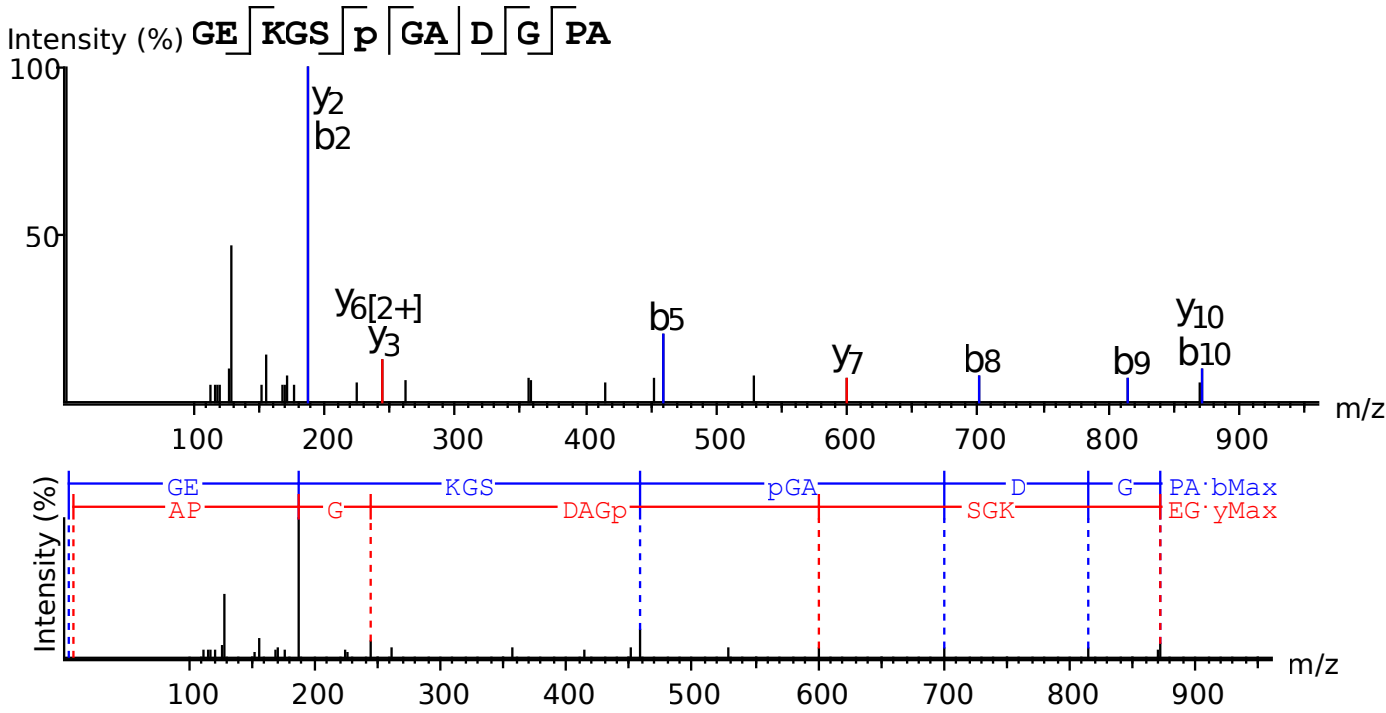

*Toxodon* sp.

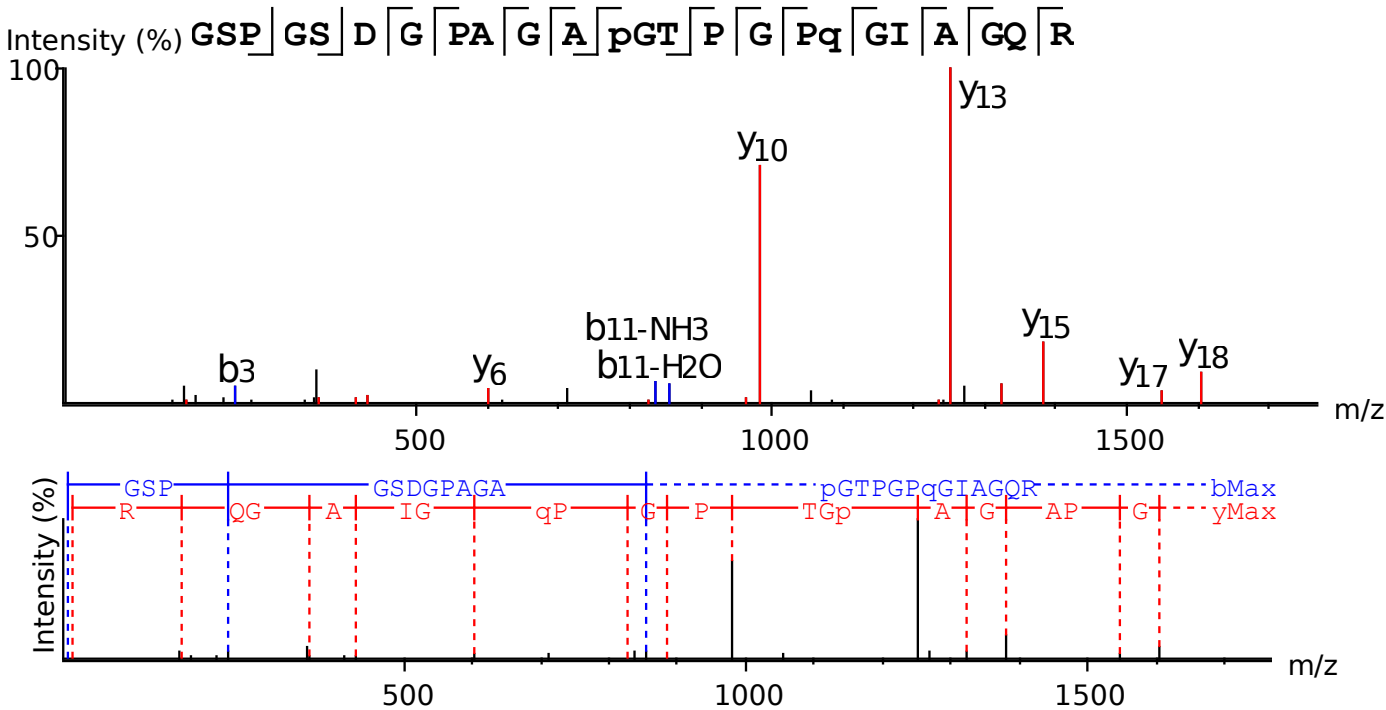



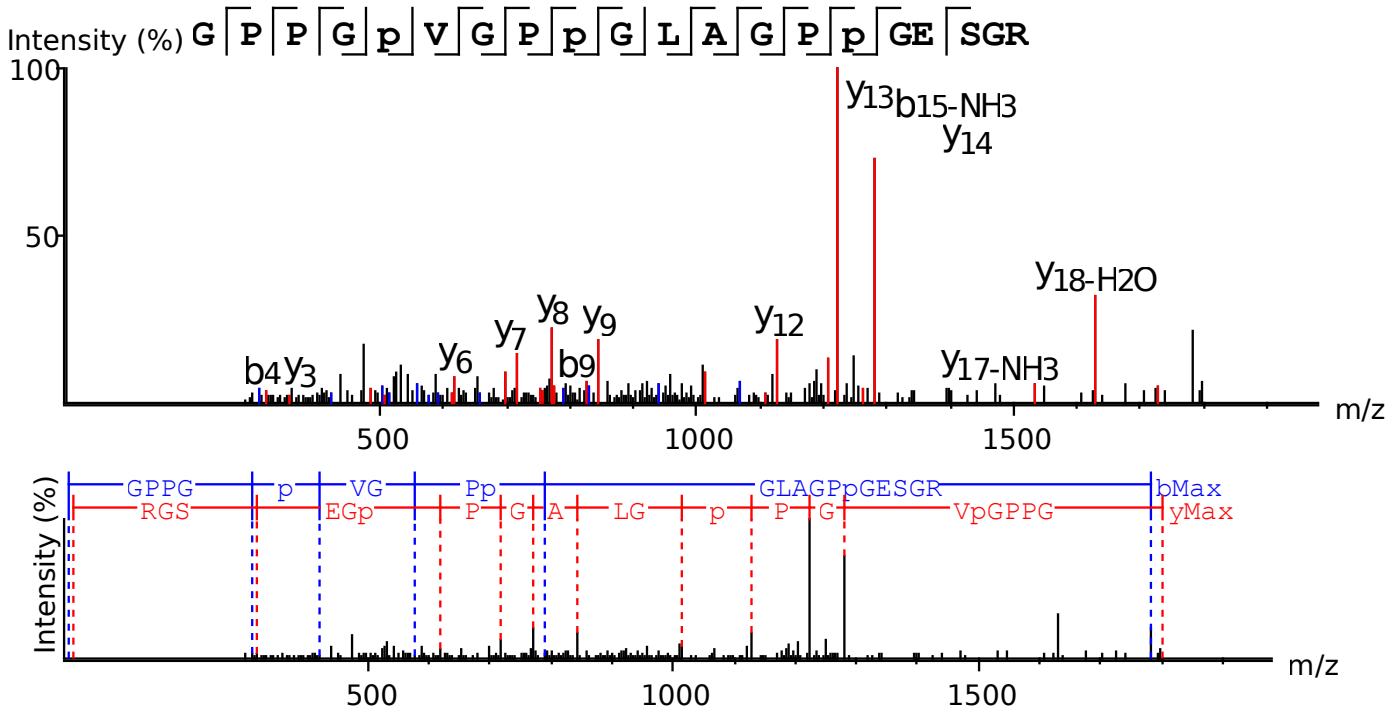*Toxodon* sp.

York12 - 9260

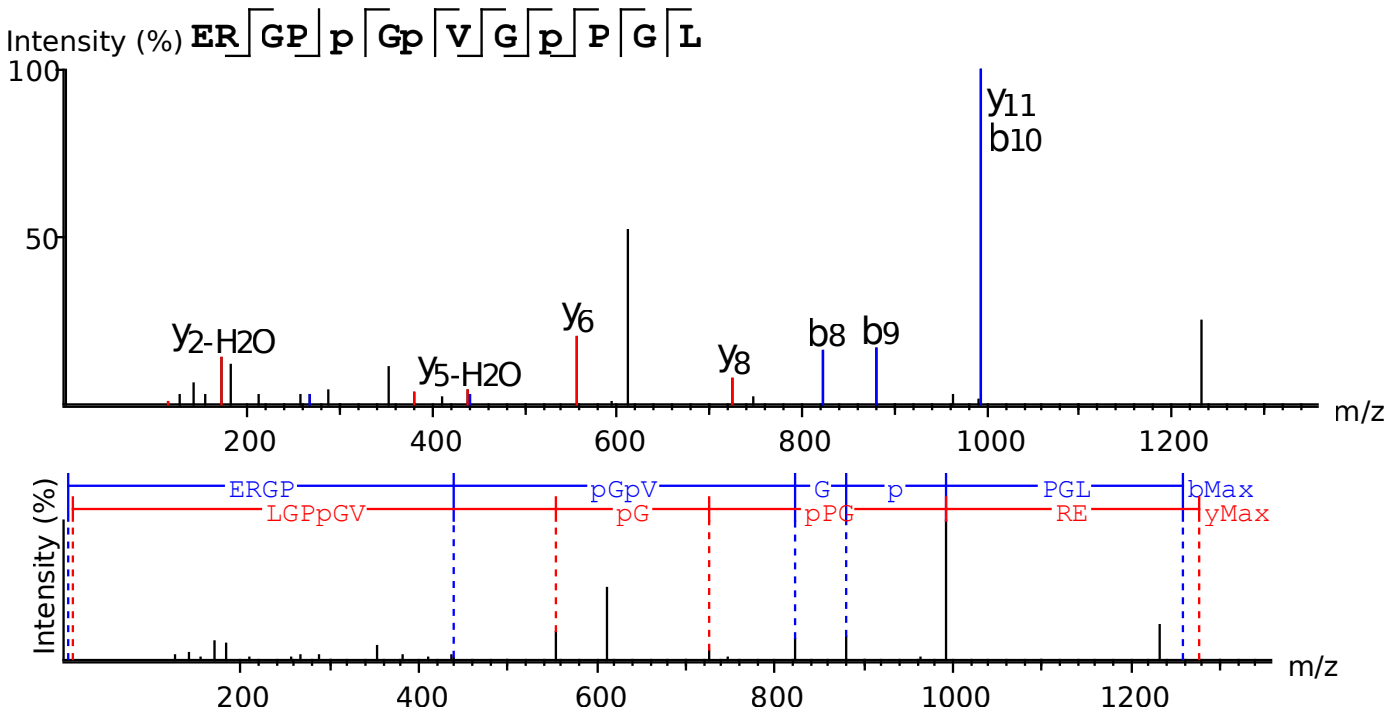

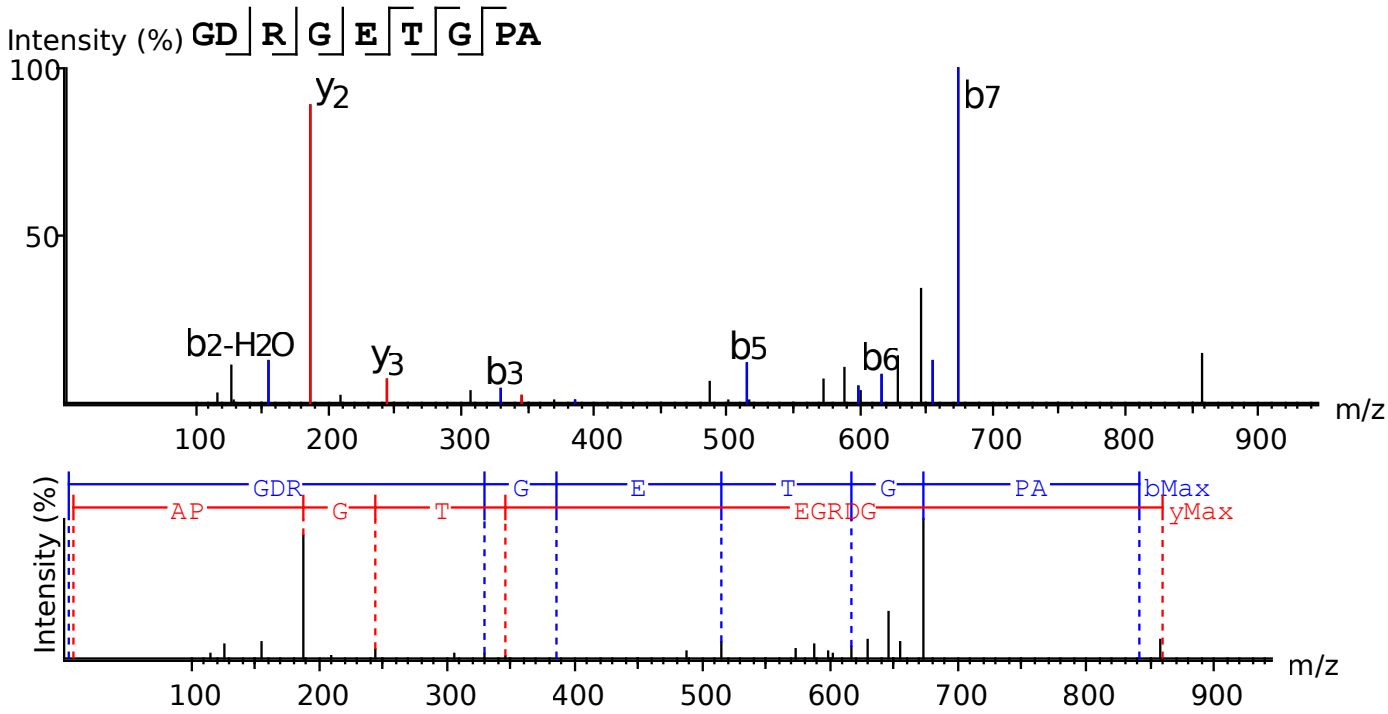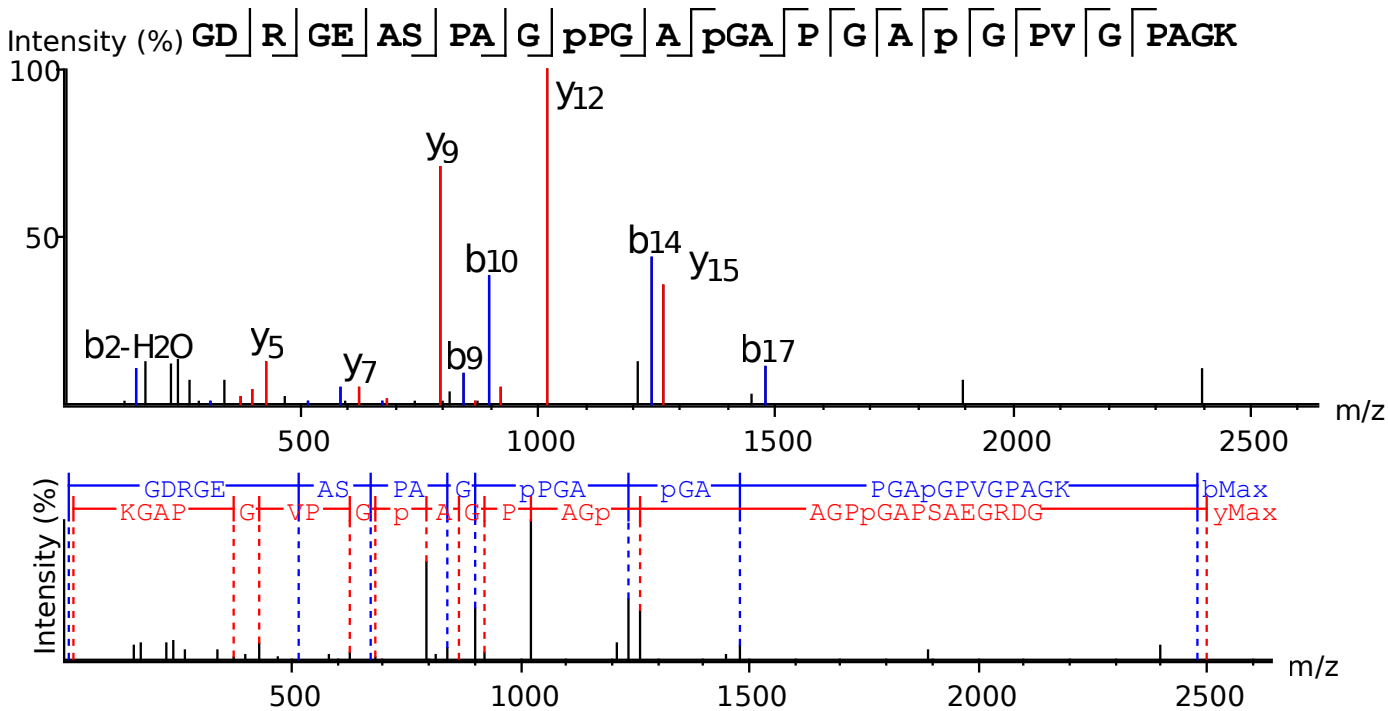

Col1α1 903

*Macrauchenia* sp.

York15 - 8957

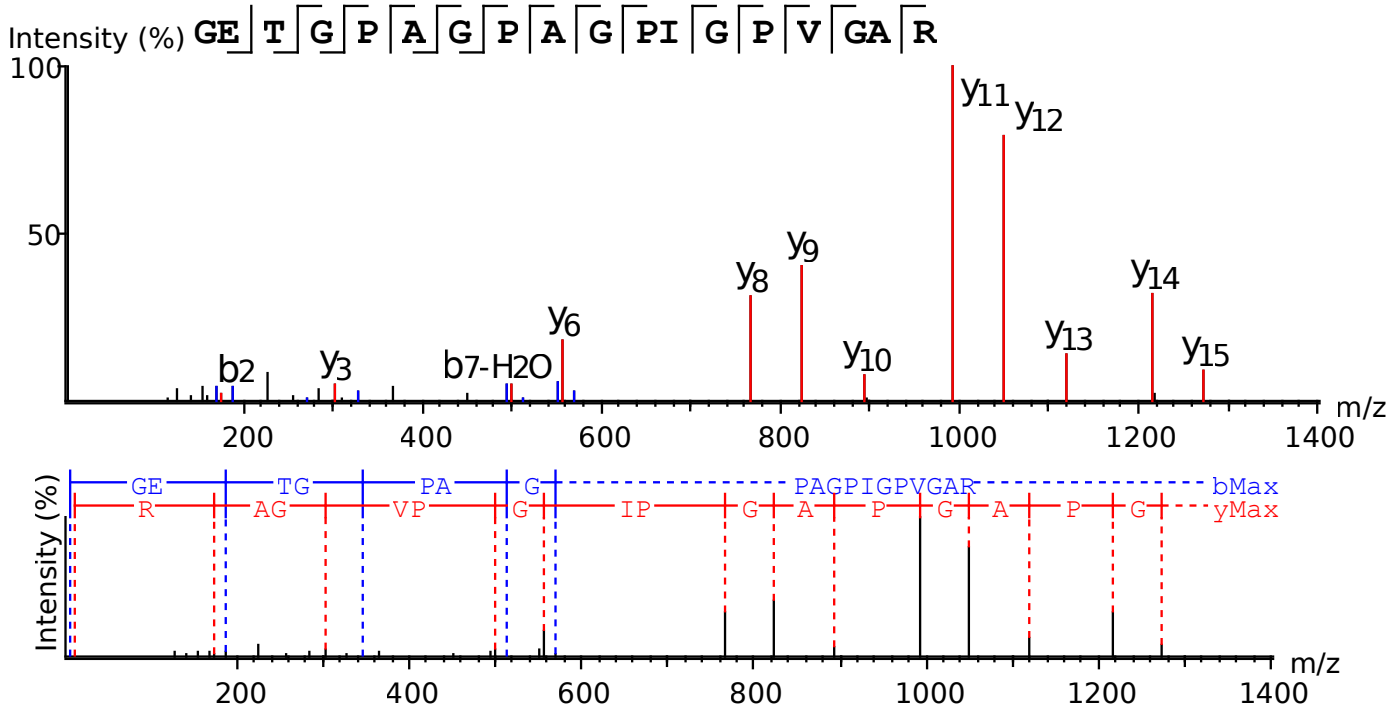

*Toxodon* sp.

York12 - 5327

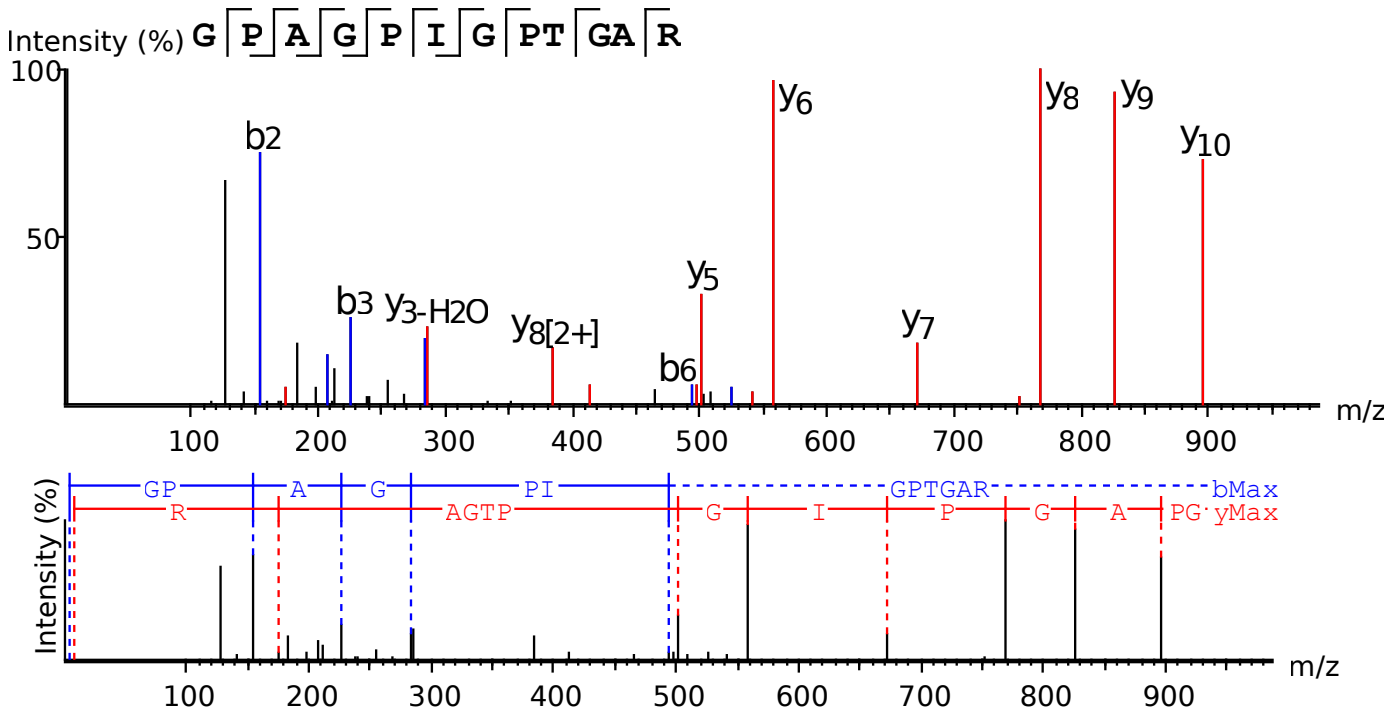

Intensity (%) G P T G P q G P R

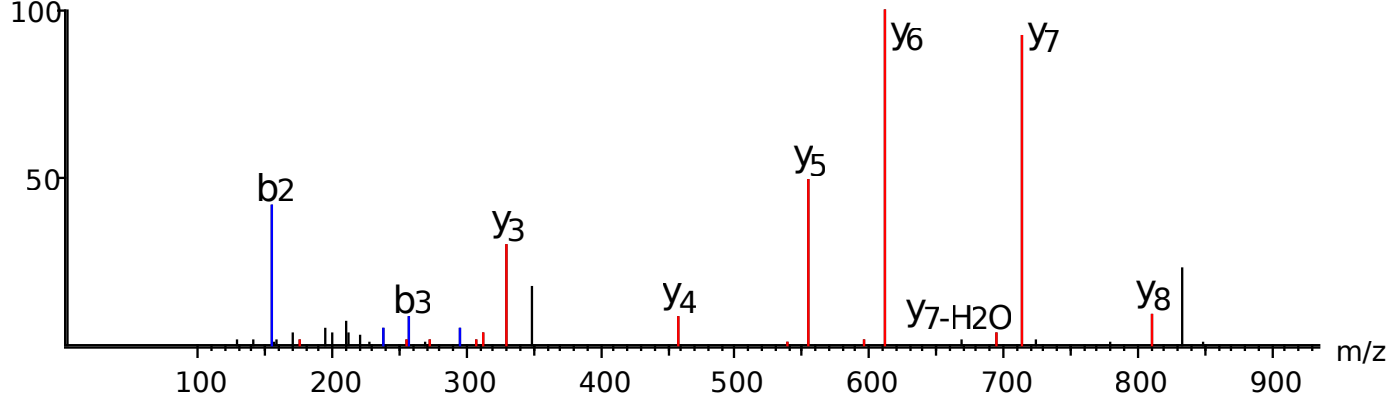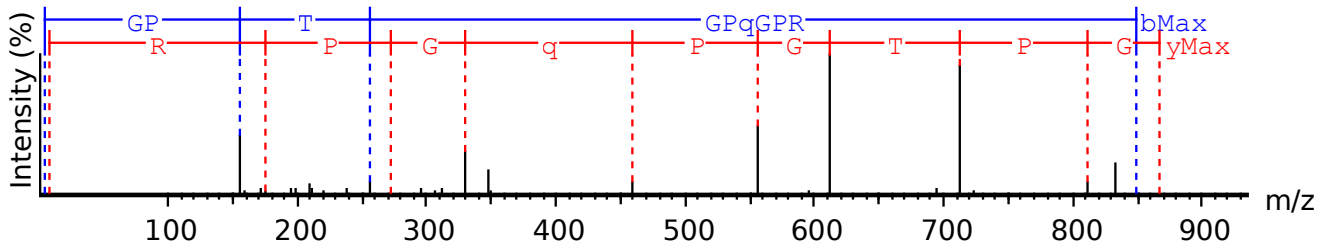

Intensity (%) G P A G P Q G P R

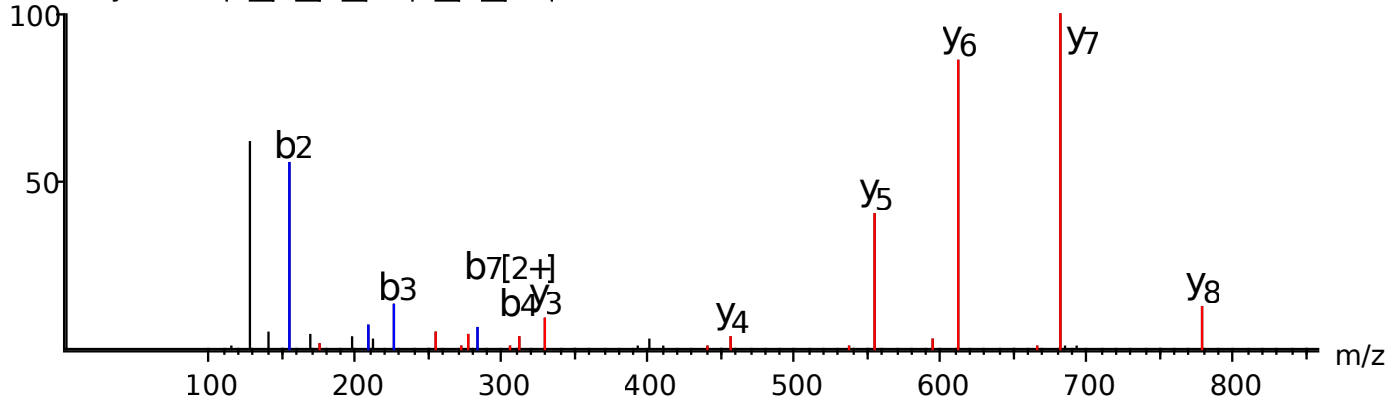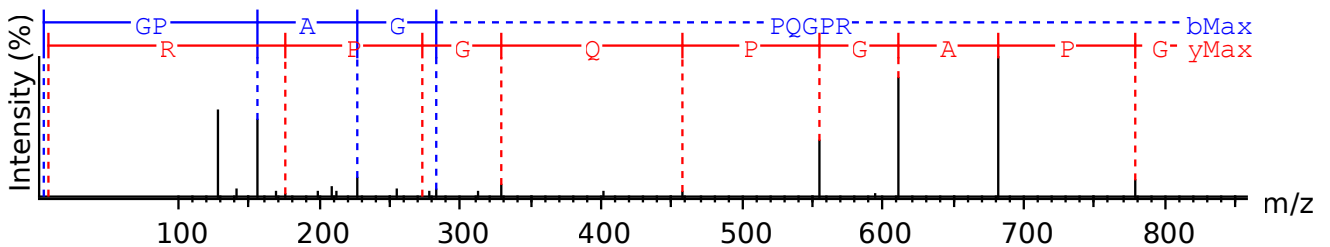

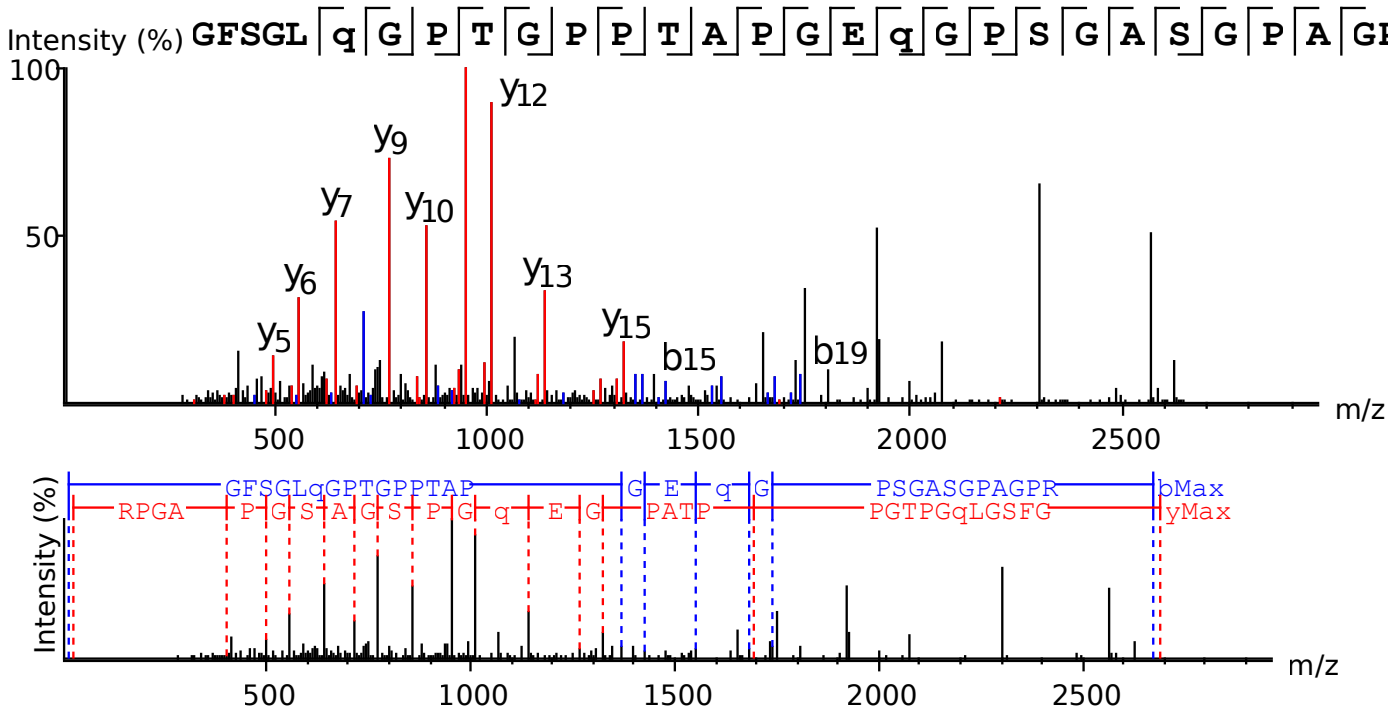

*Toxodon* sp.

York13 - 9342

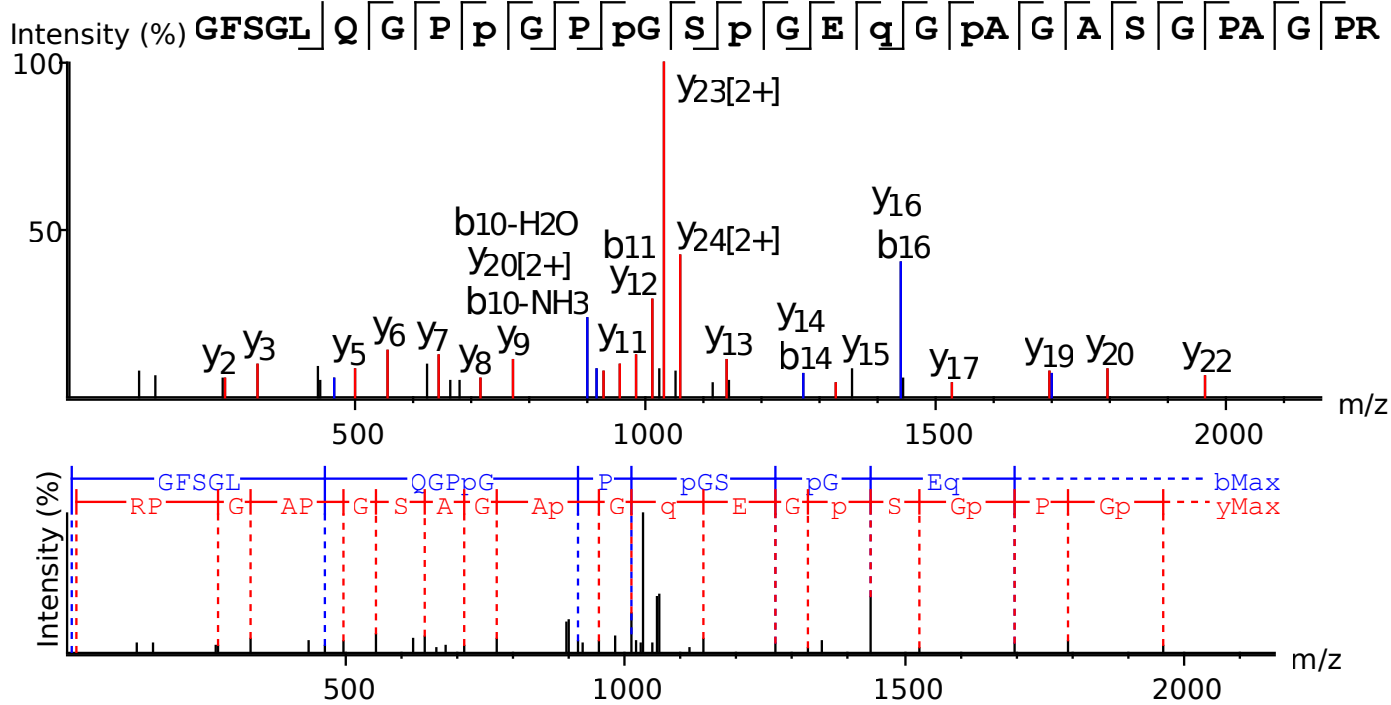

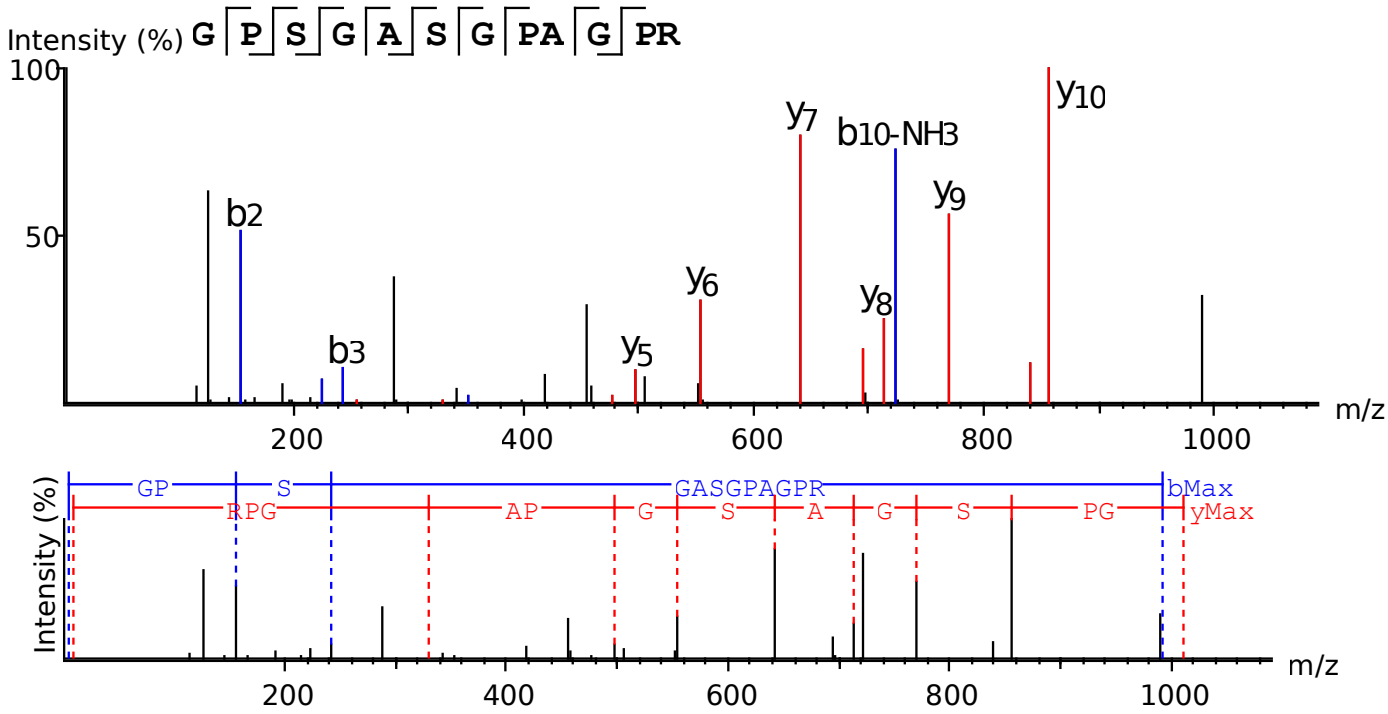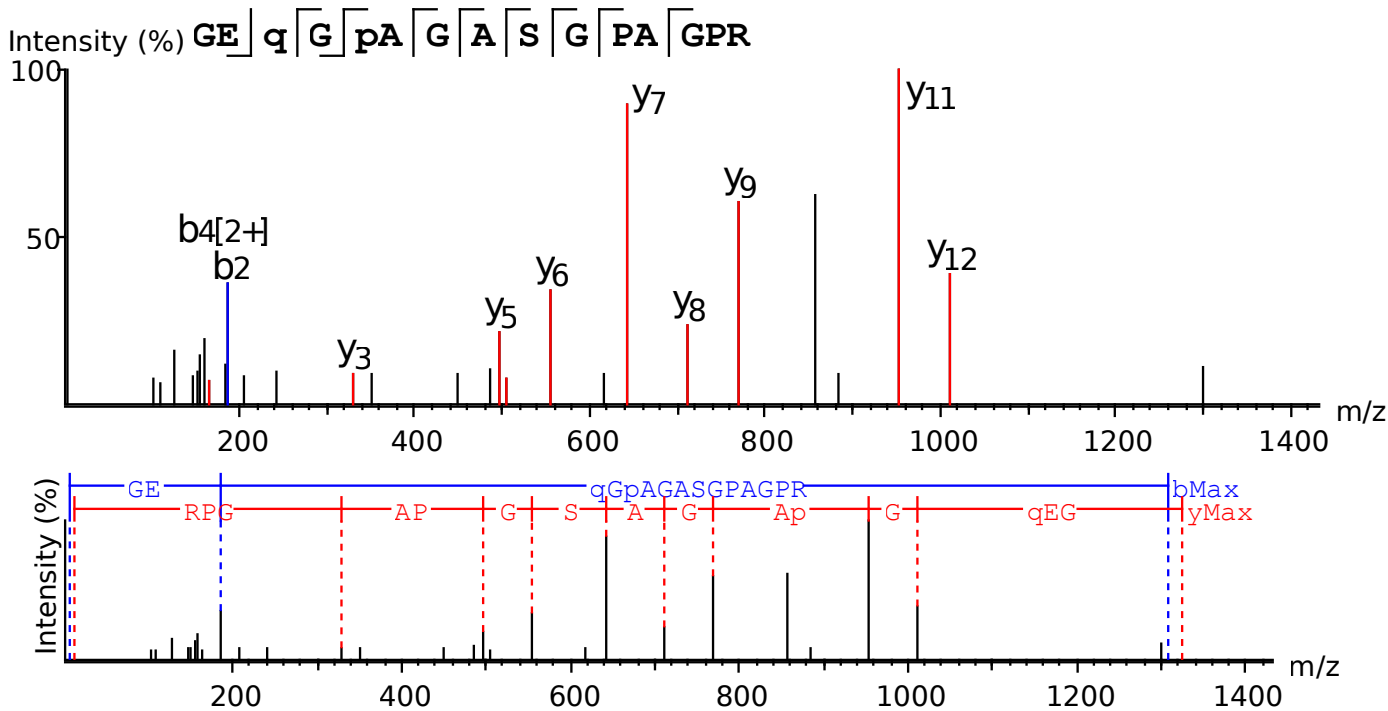

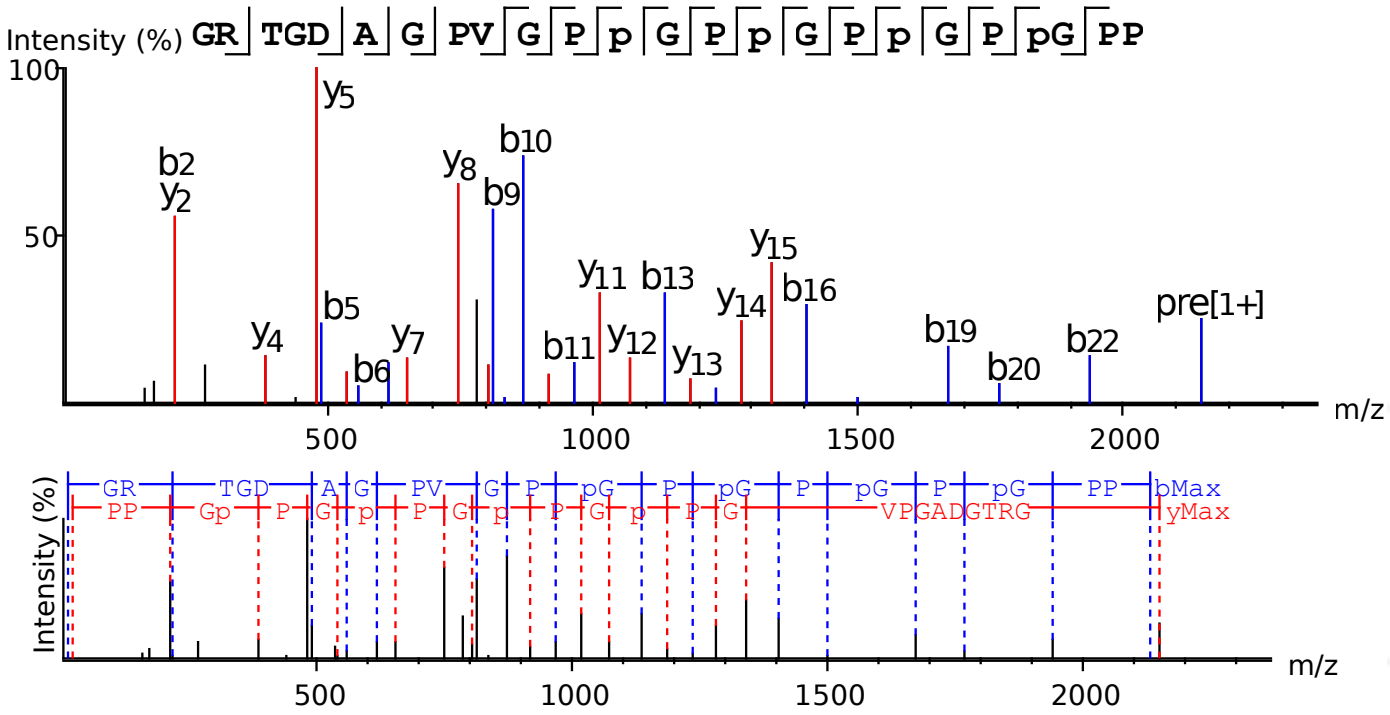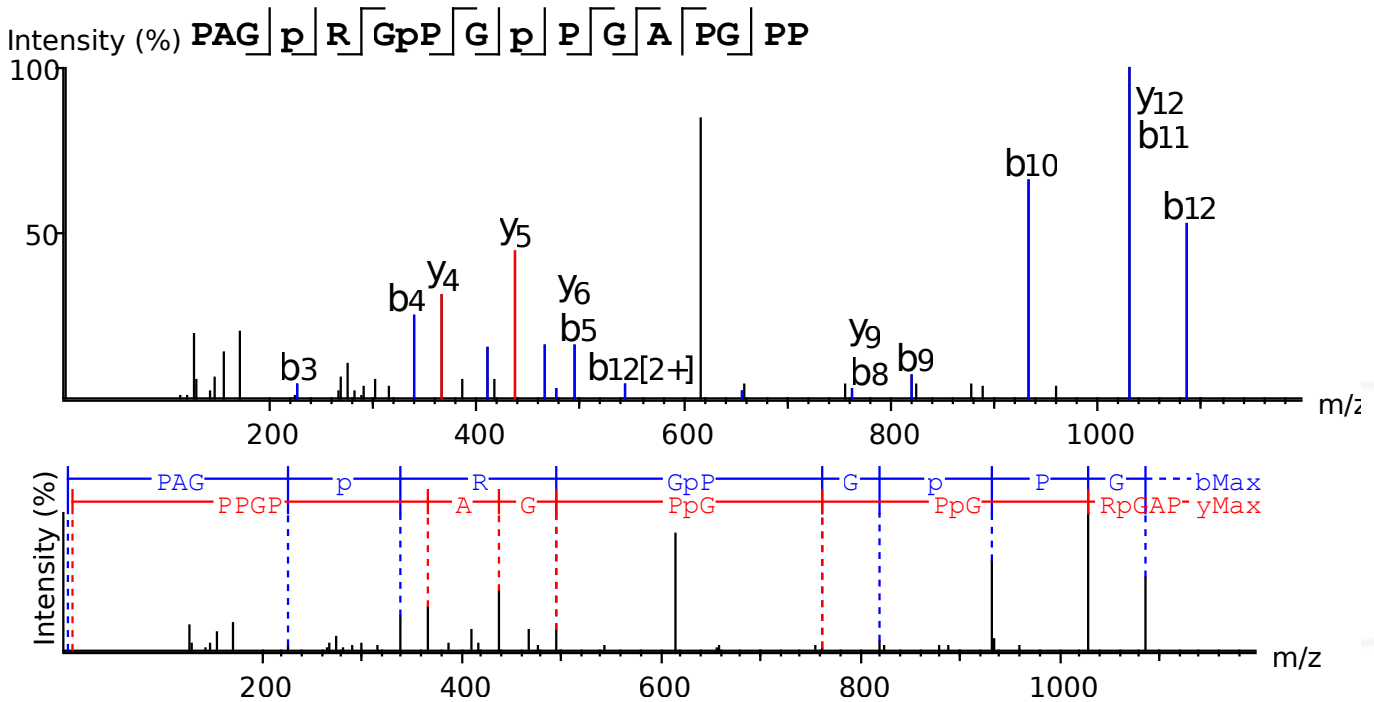

Col1α2 216

*Macrauchenia* sp.

MLP2012.12 - 2029

Intensity (%) p G A n G L p G A K

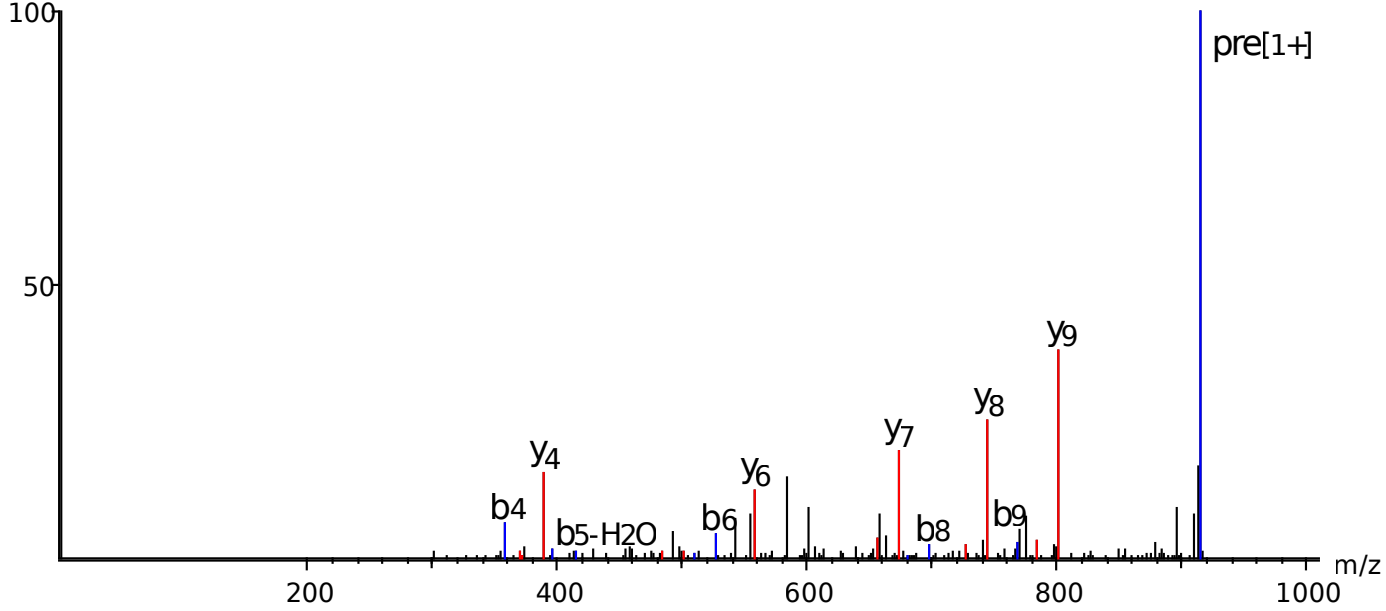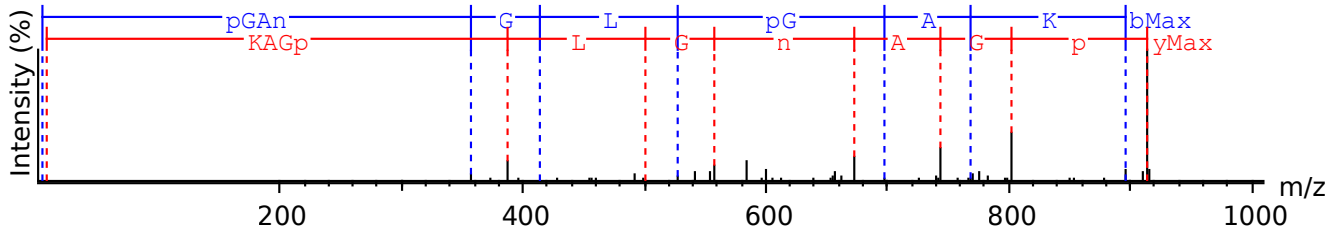

*Toxodon* sp.

York12 - 11741

Intensity (%) G E V G L p G V S G P V G P P G n p G A n G L T G A k

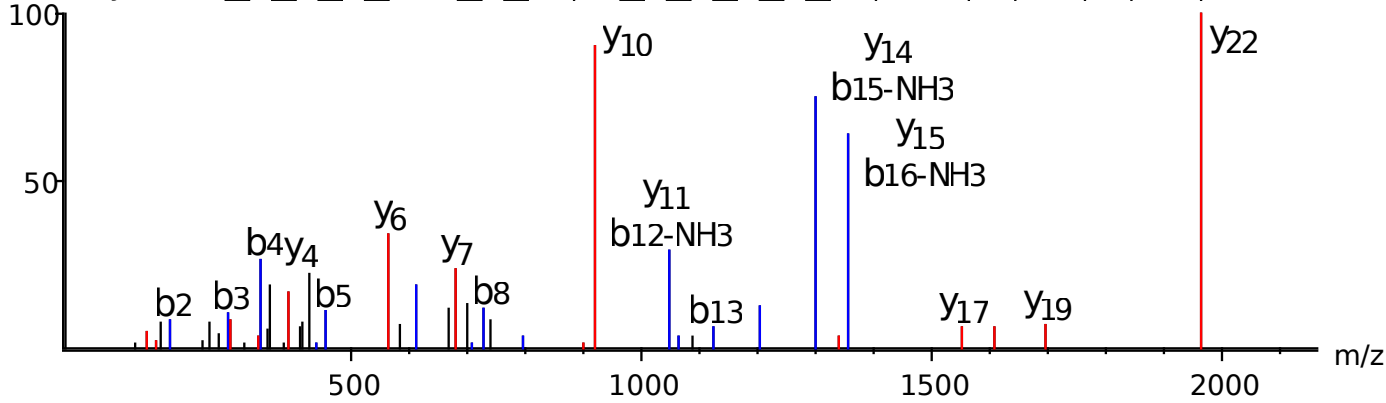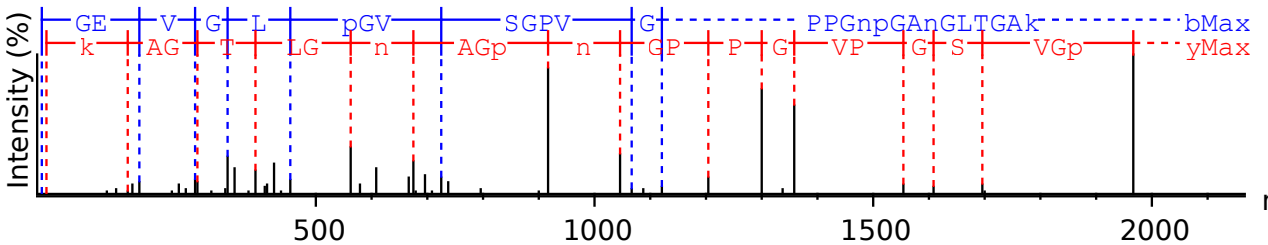



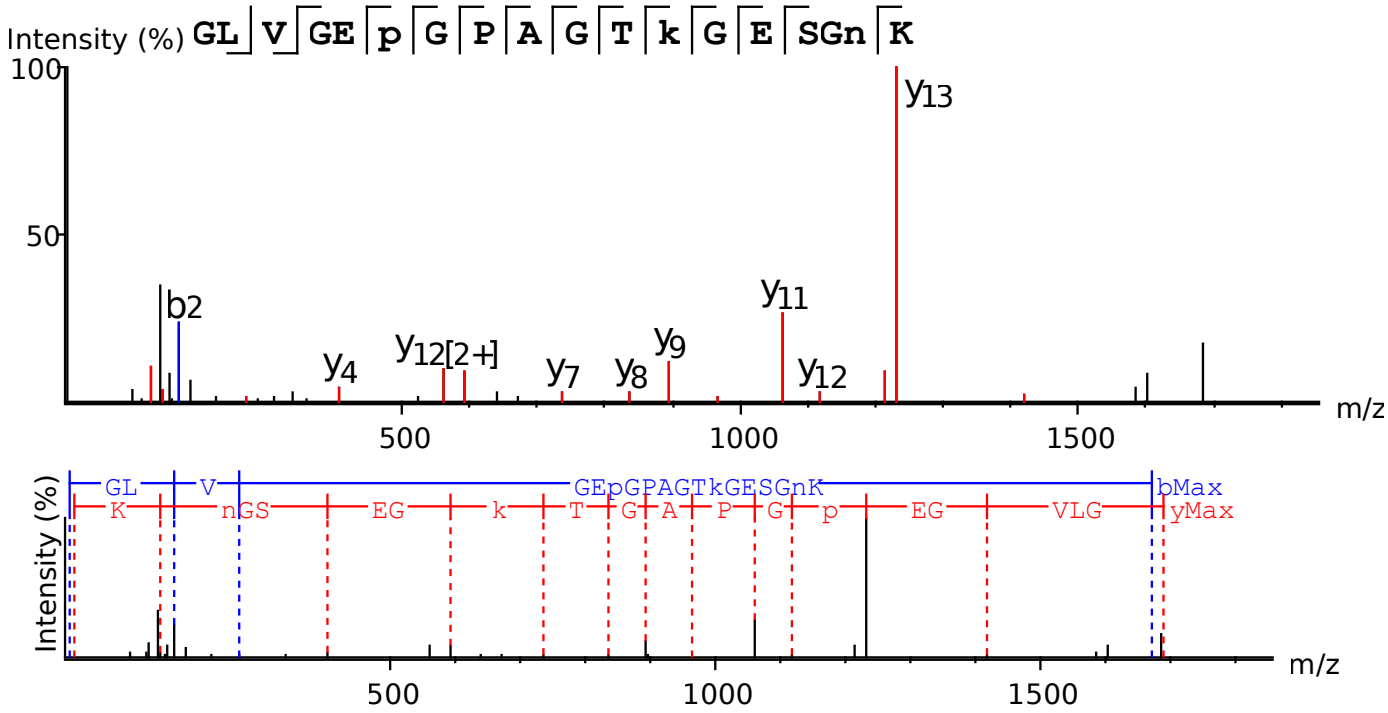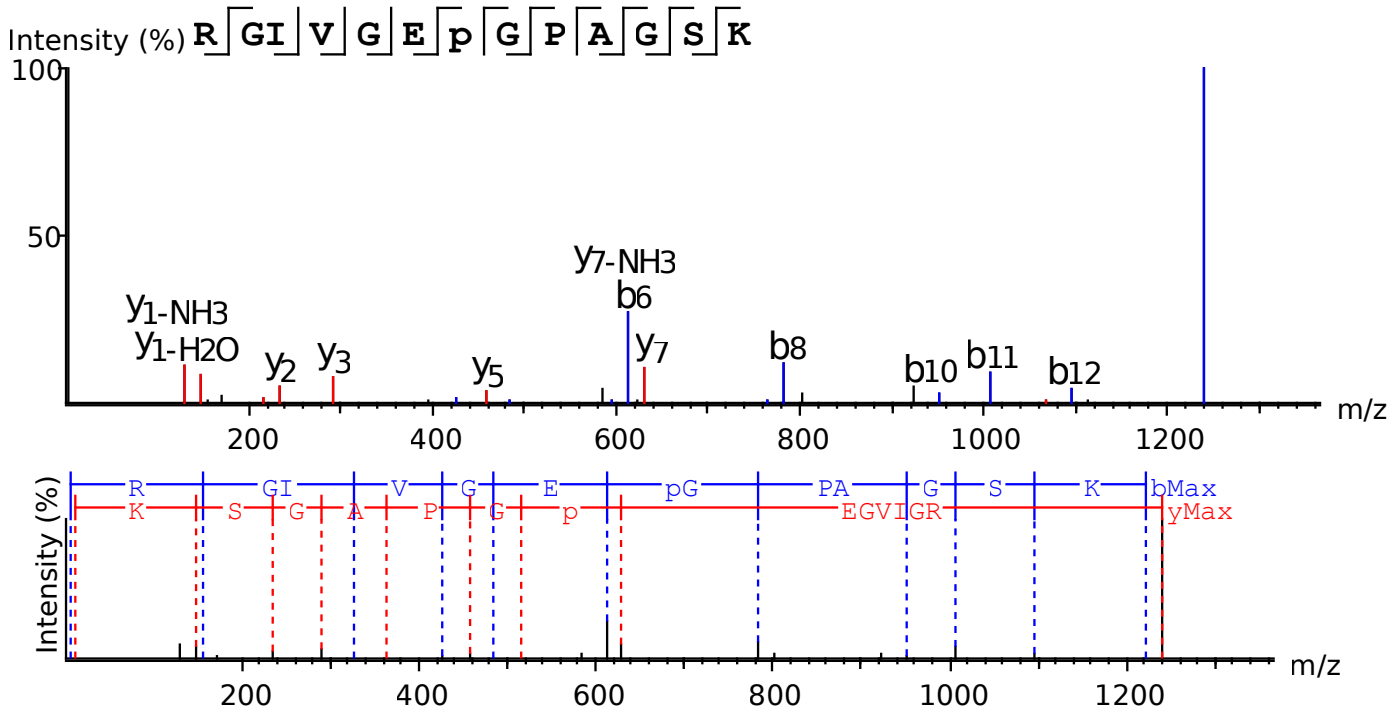

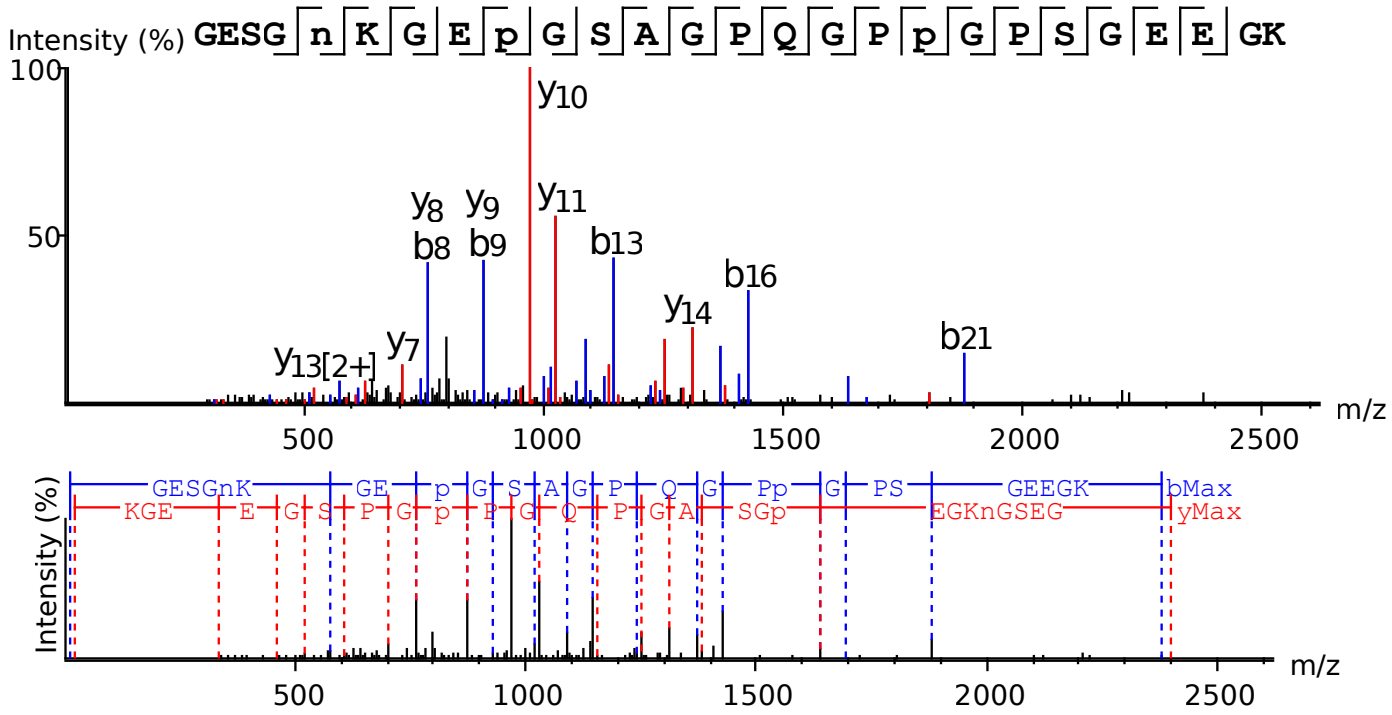

*Toxodon* sp.

York13 - 2187

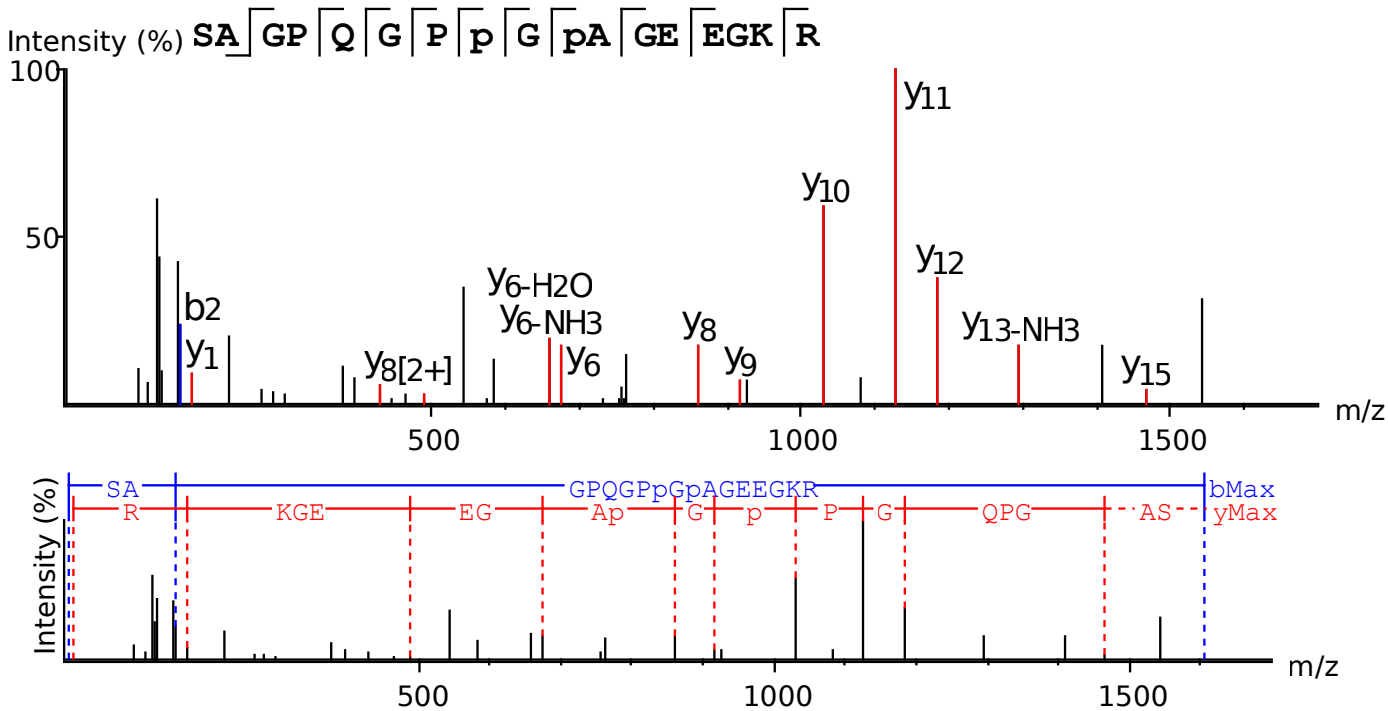

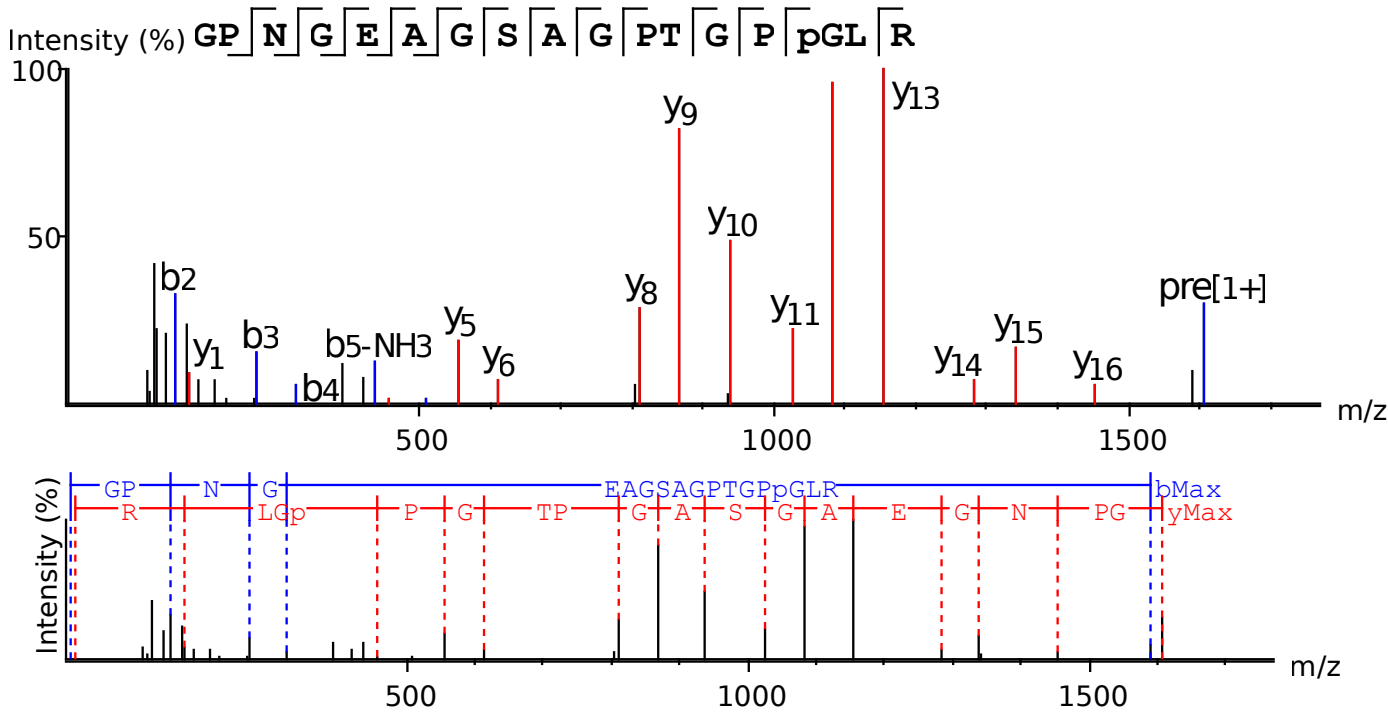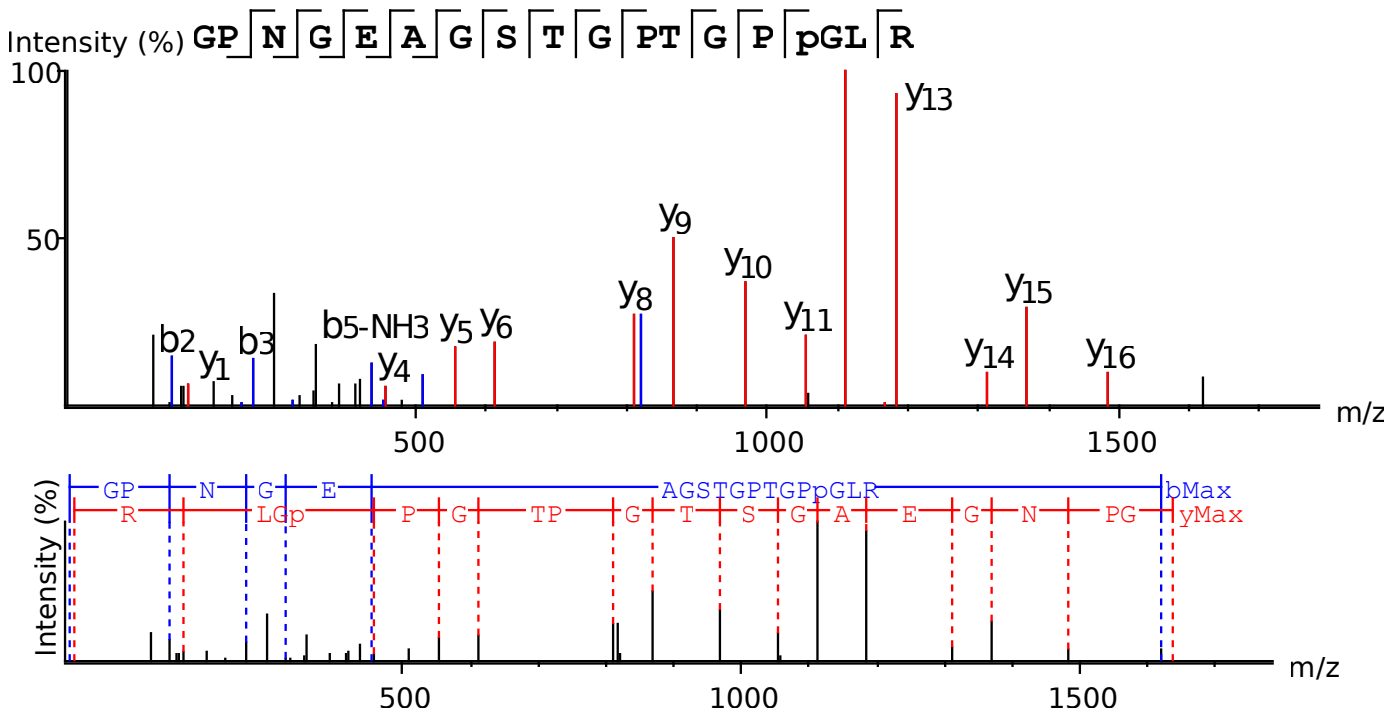

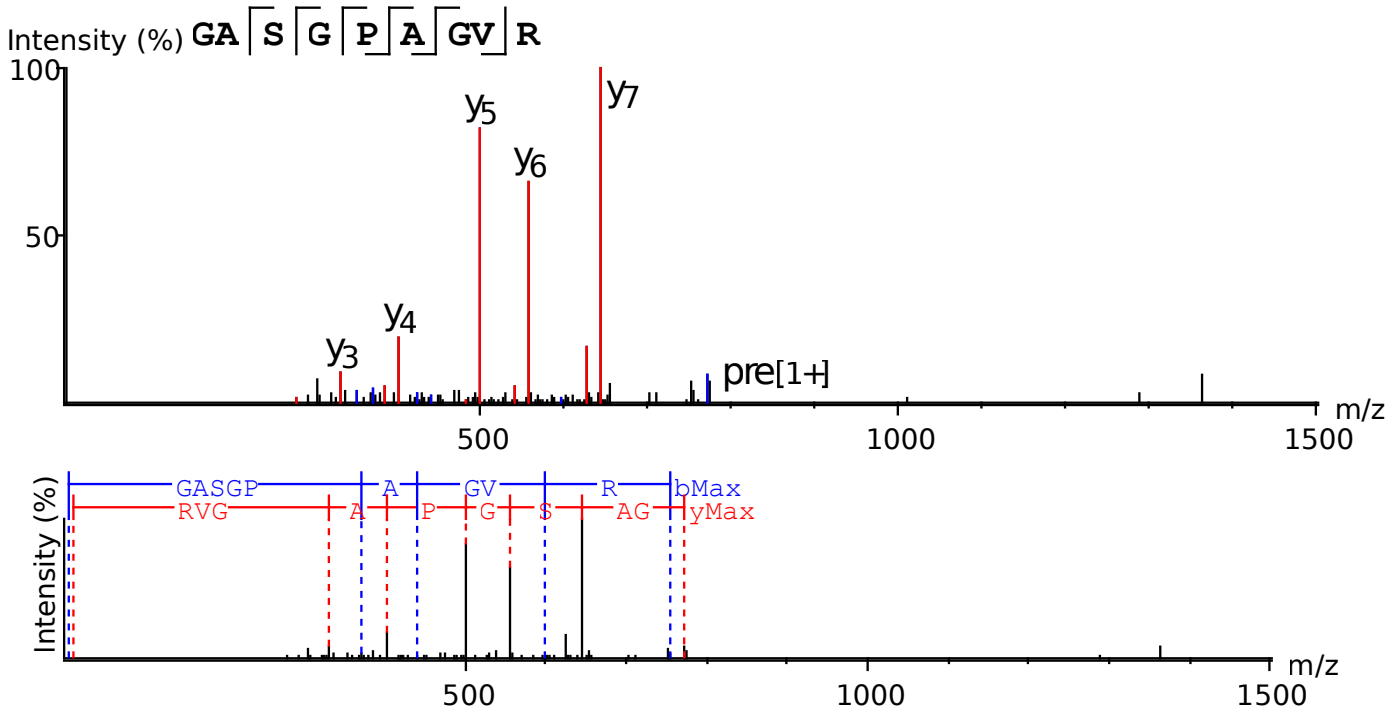*Toxodon sp.*

York13 - 2329

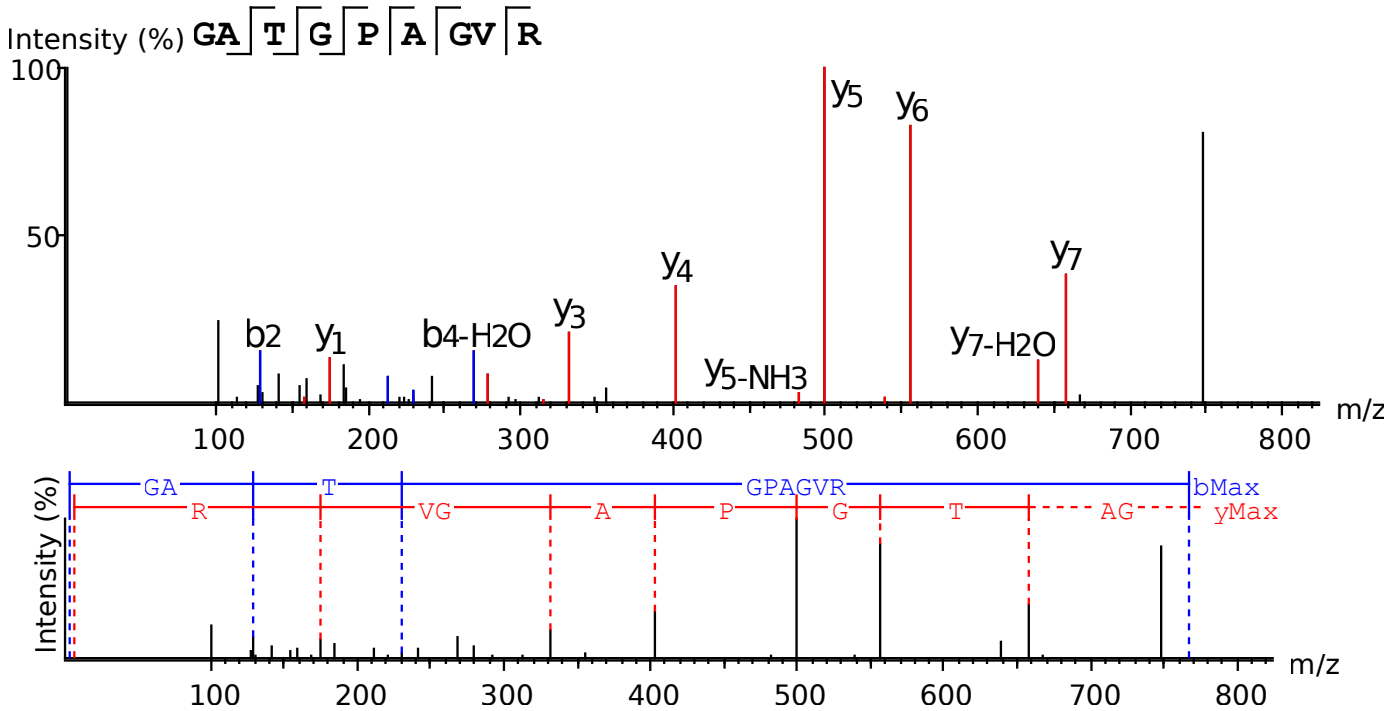

Intensity (%) **GF** p **G** **S** p **G** **N** **V** **G** **P** **A** **G** **K**

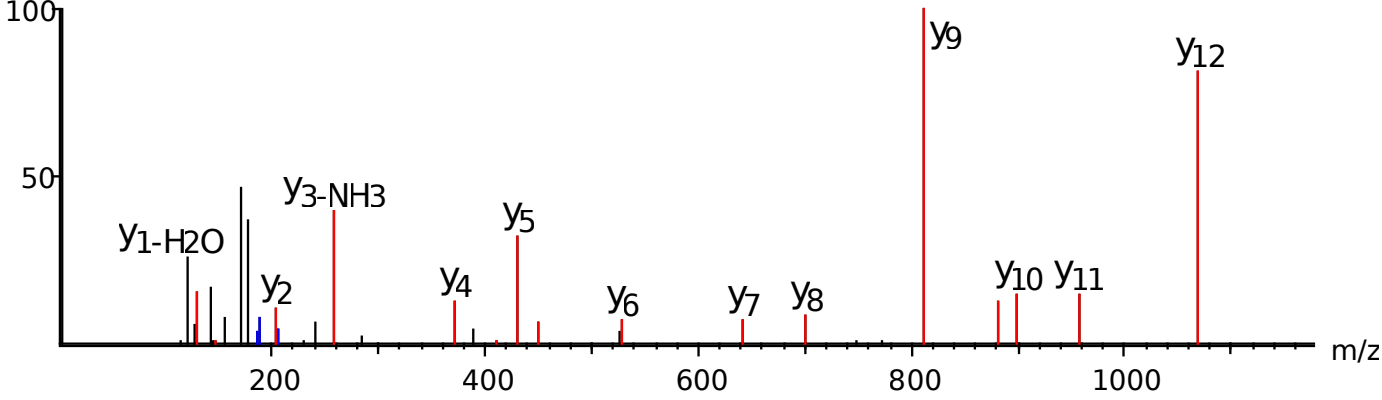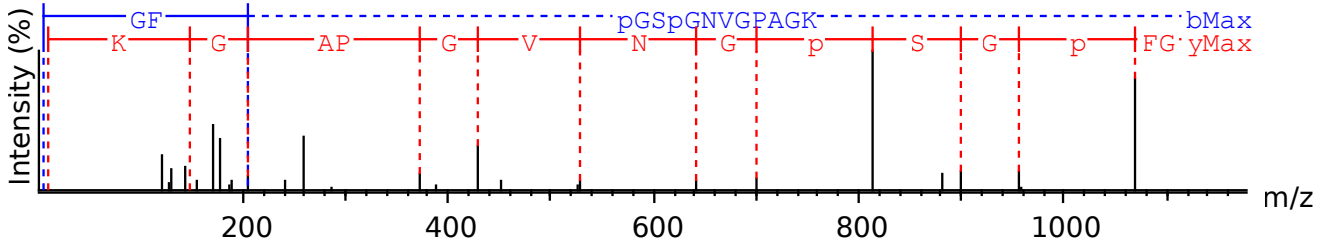

Intensity (%) **GF** p **G** **S** p **G** **NI** **G** **P** **A** **G** **K**

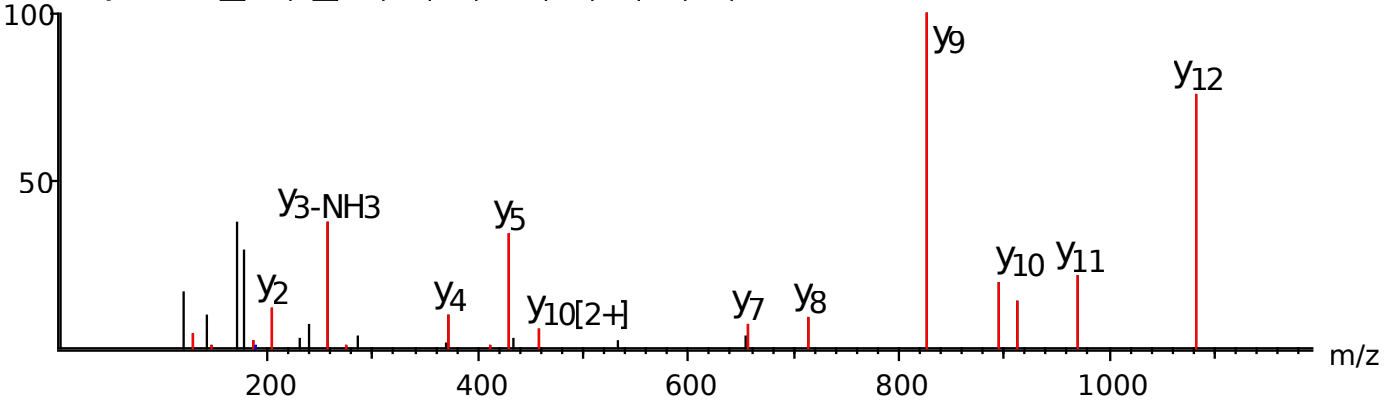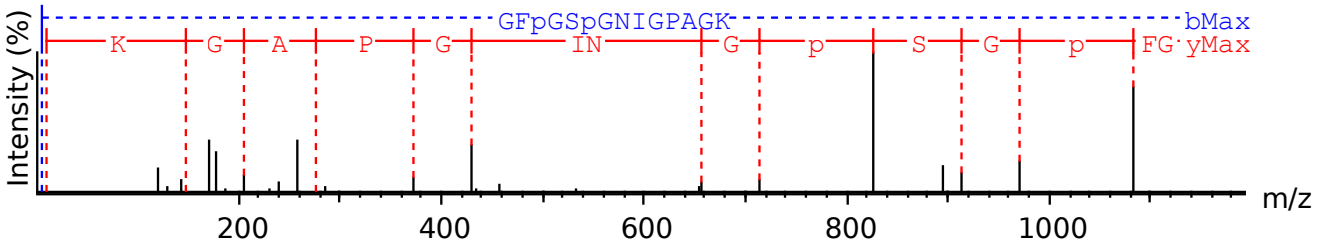

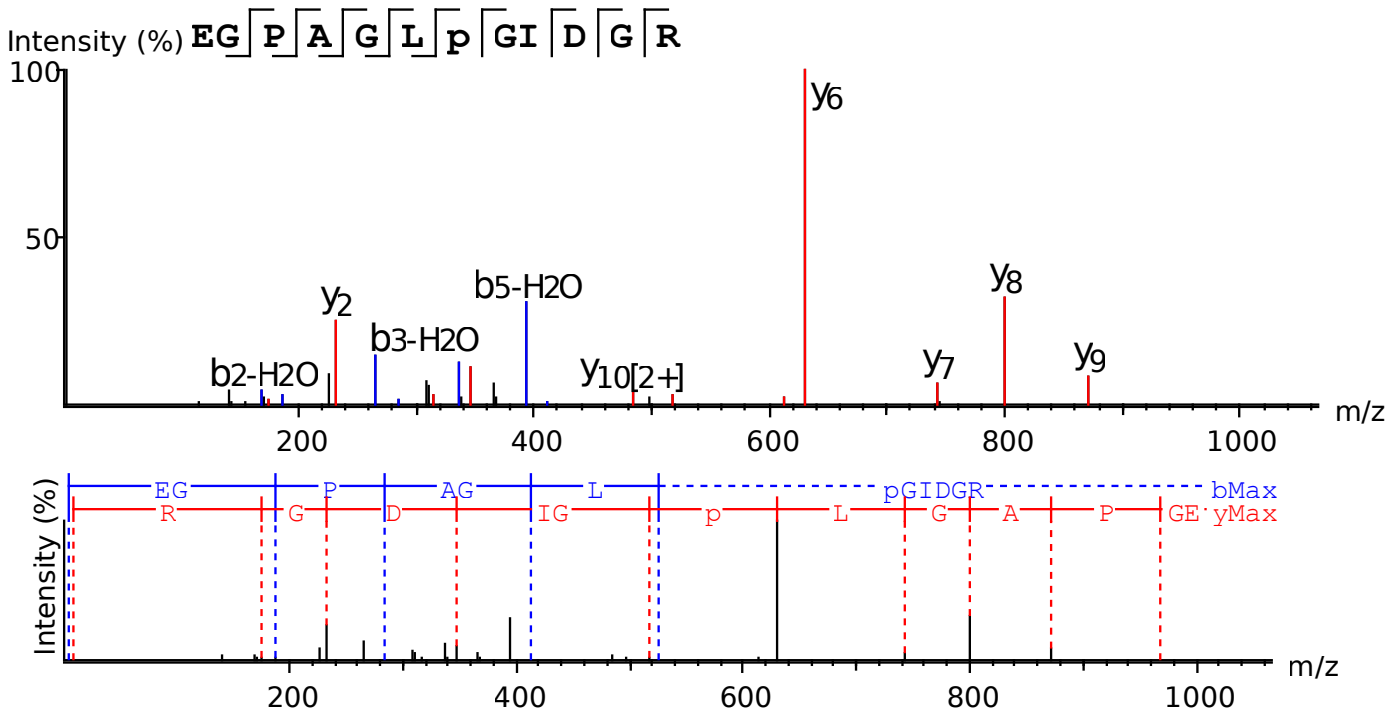*Toxodon* sp.

York13 - 10735

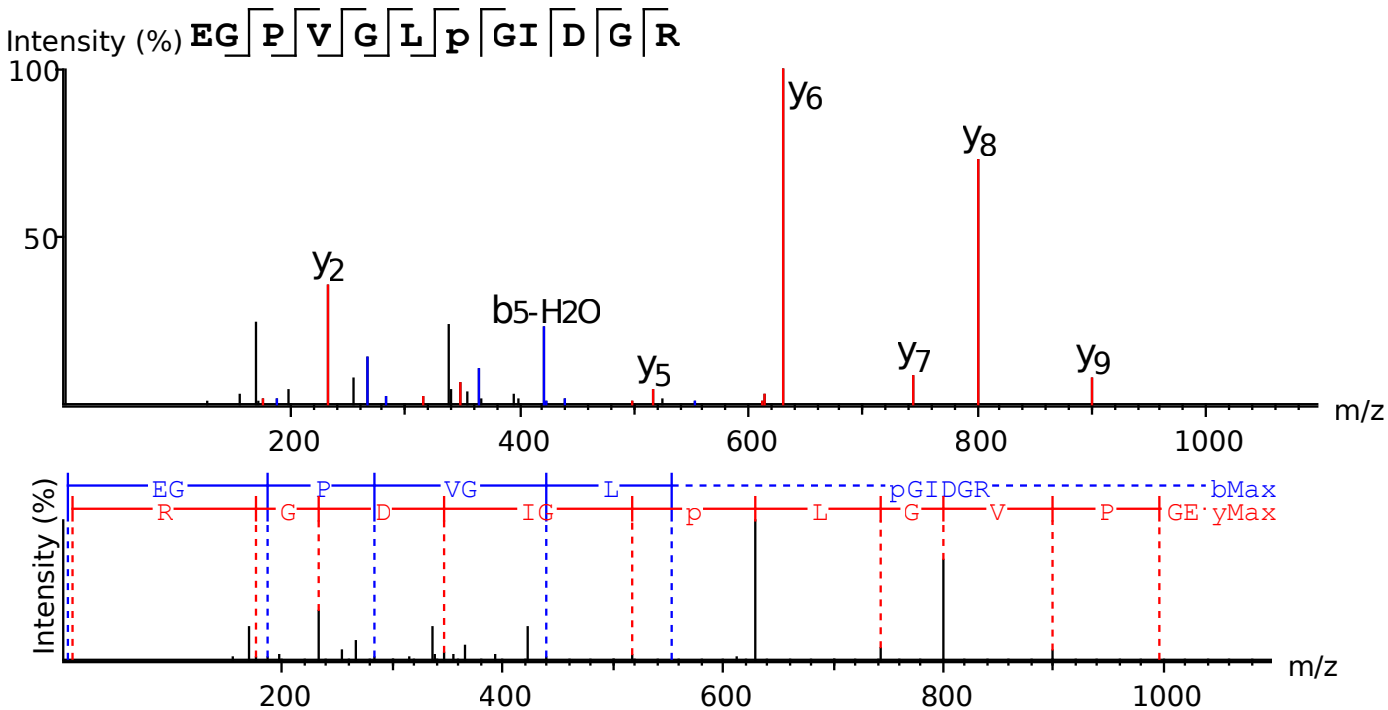

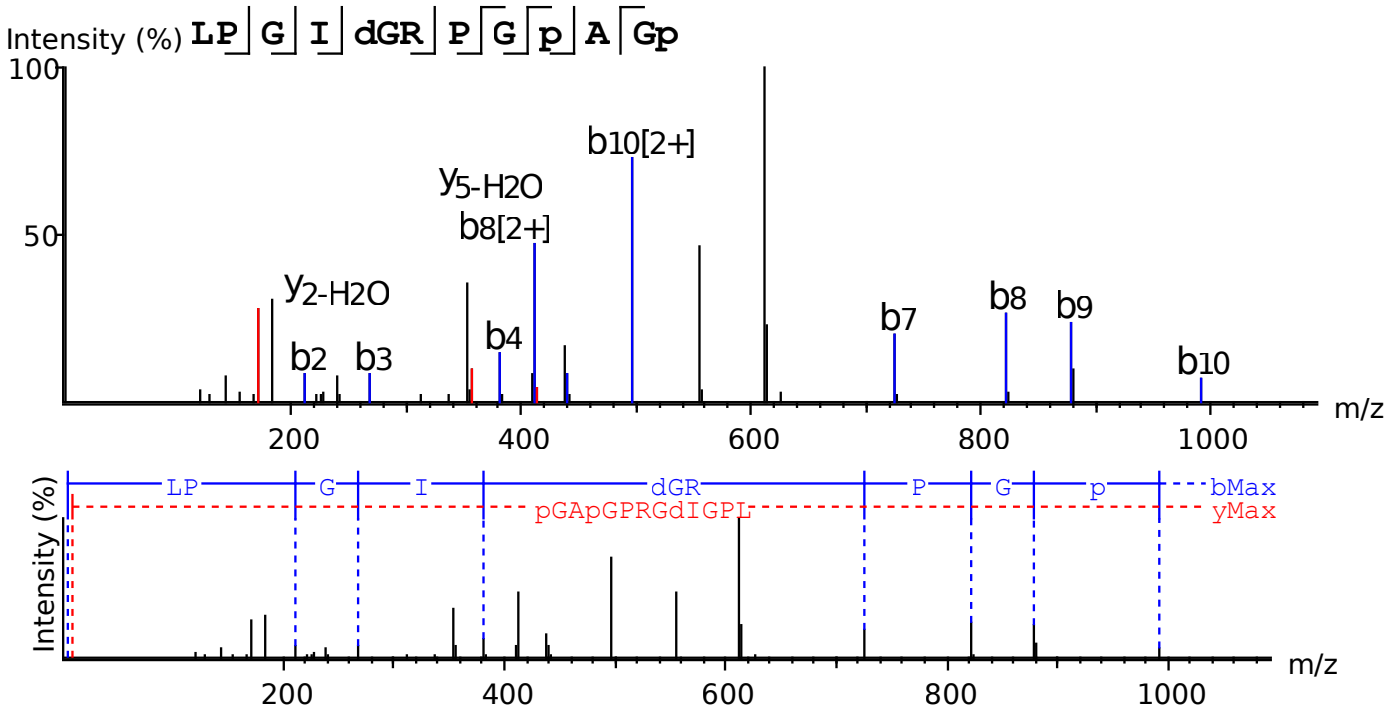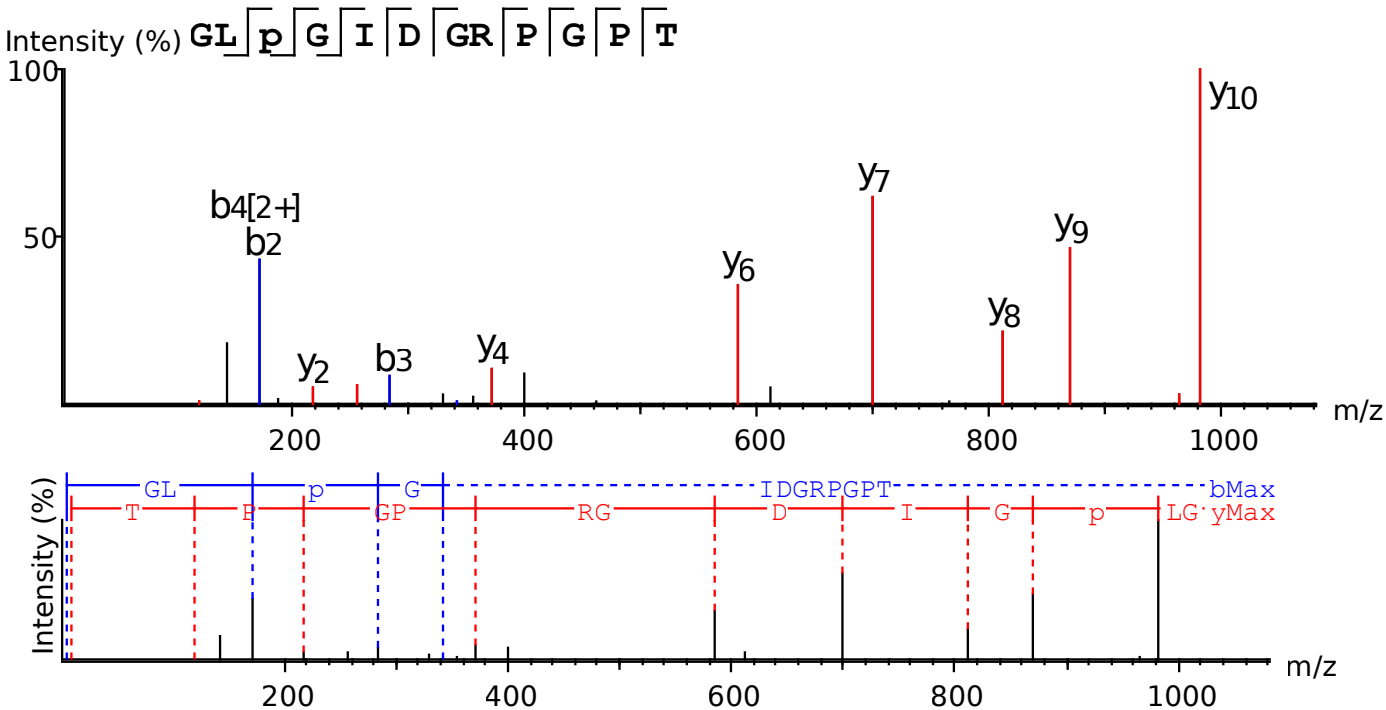

Col1α2 477

*Macrauchenia* sp.

MLP2012.12 - 8835

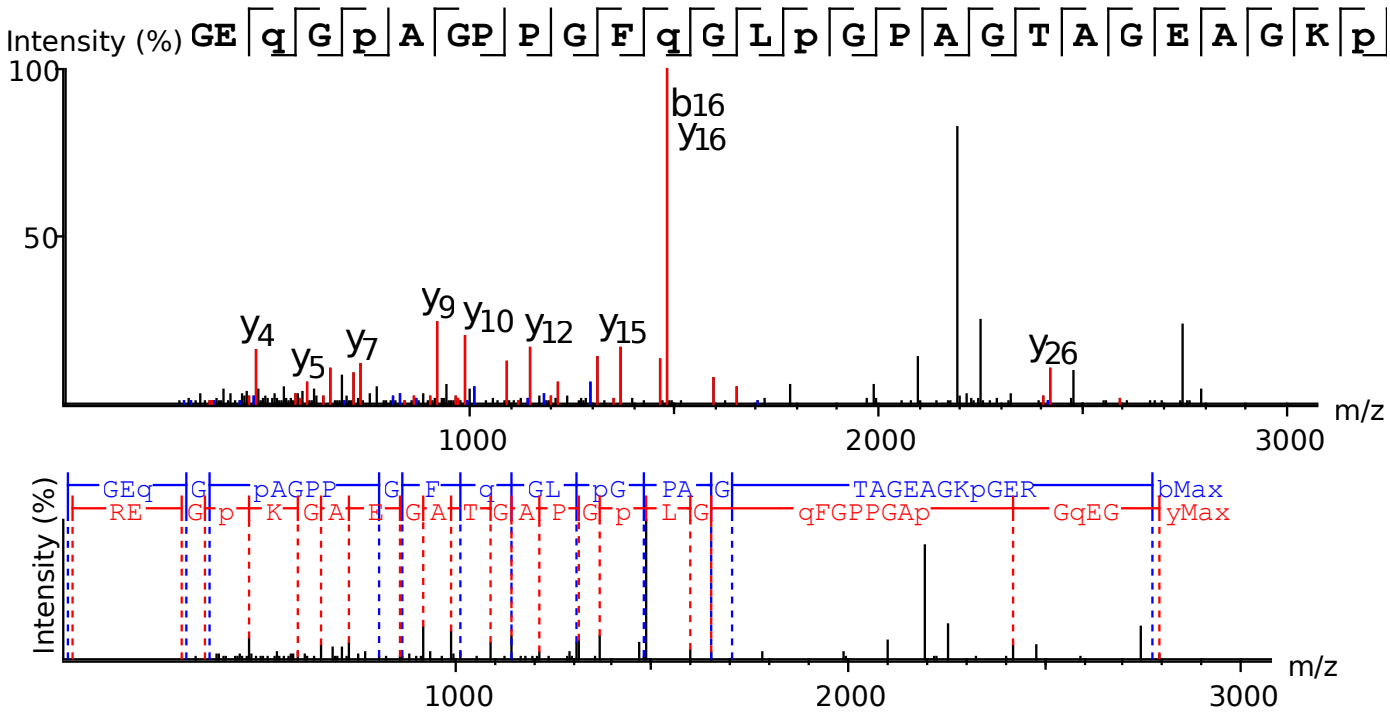

*Toxodon* sp.

York12 - 2659

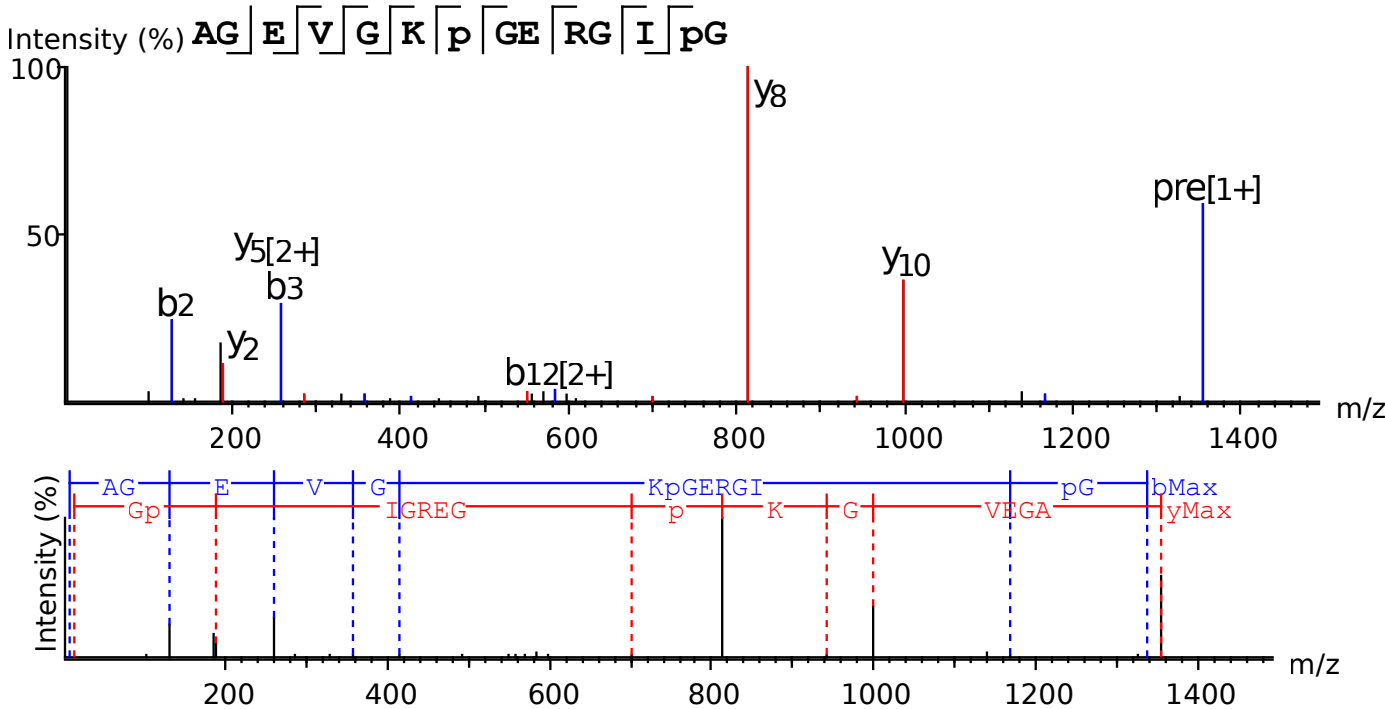



Col1α2 510

*Macrauchenia* sp.

York15 - 5533

Intensity (%) **G** **P** **p** **G** **E** **S** **G** **A** **A** **G** **pA** **G** **PI** **GSR**

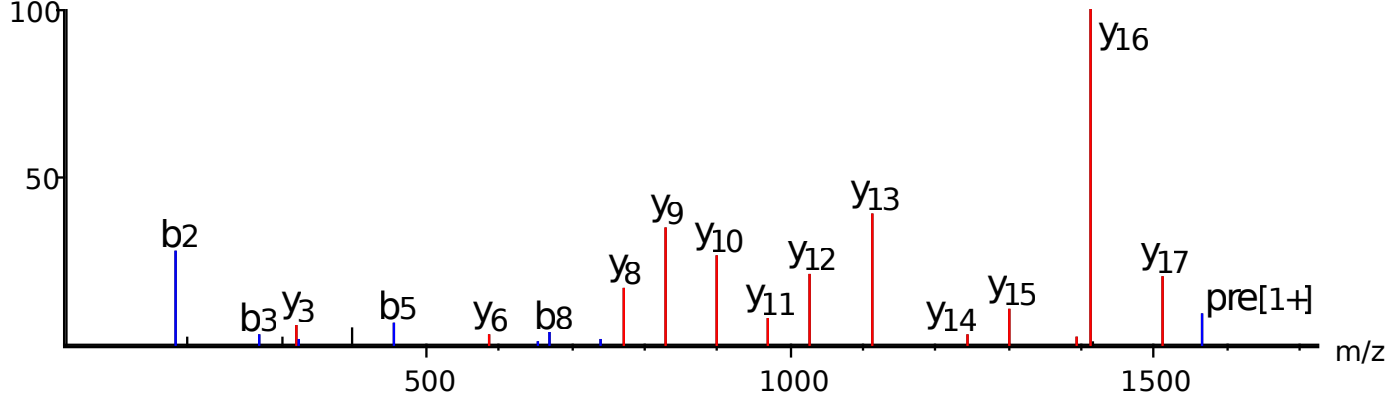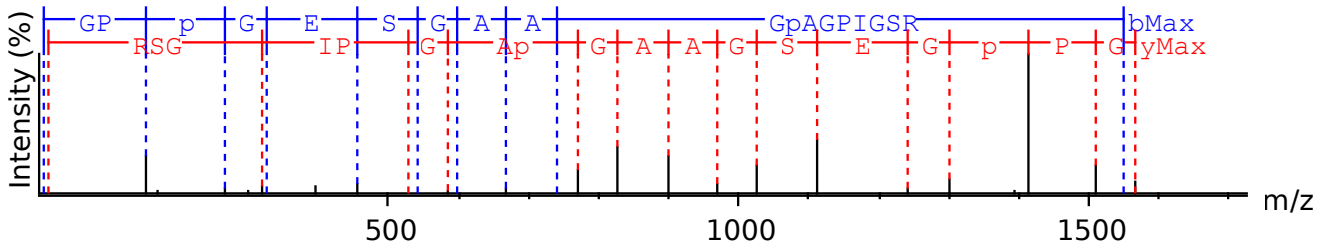

*Toxodon* sp.

York13 - 6223

Intensity (%) **G** **P** **p** **G** **E** **S** **G** **A** **V** **G** **pA** **G** **PI** **GS** **R**

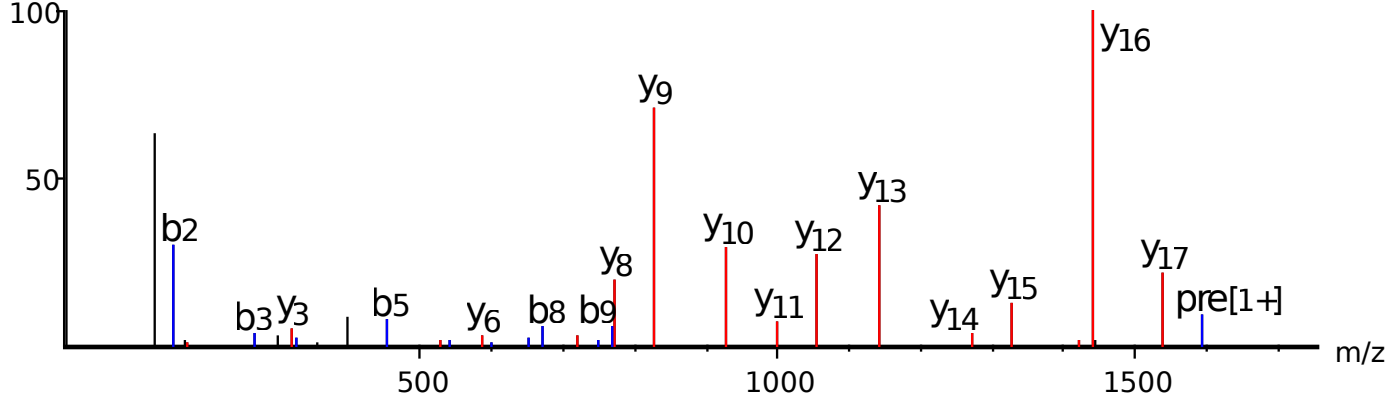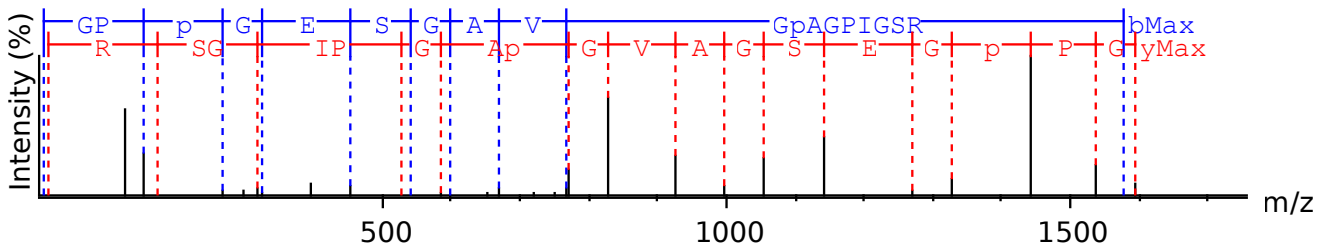

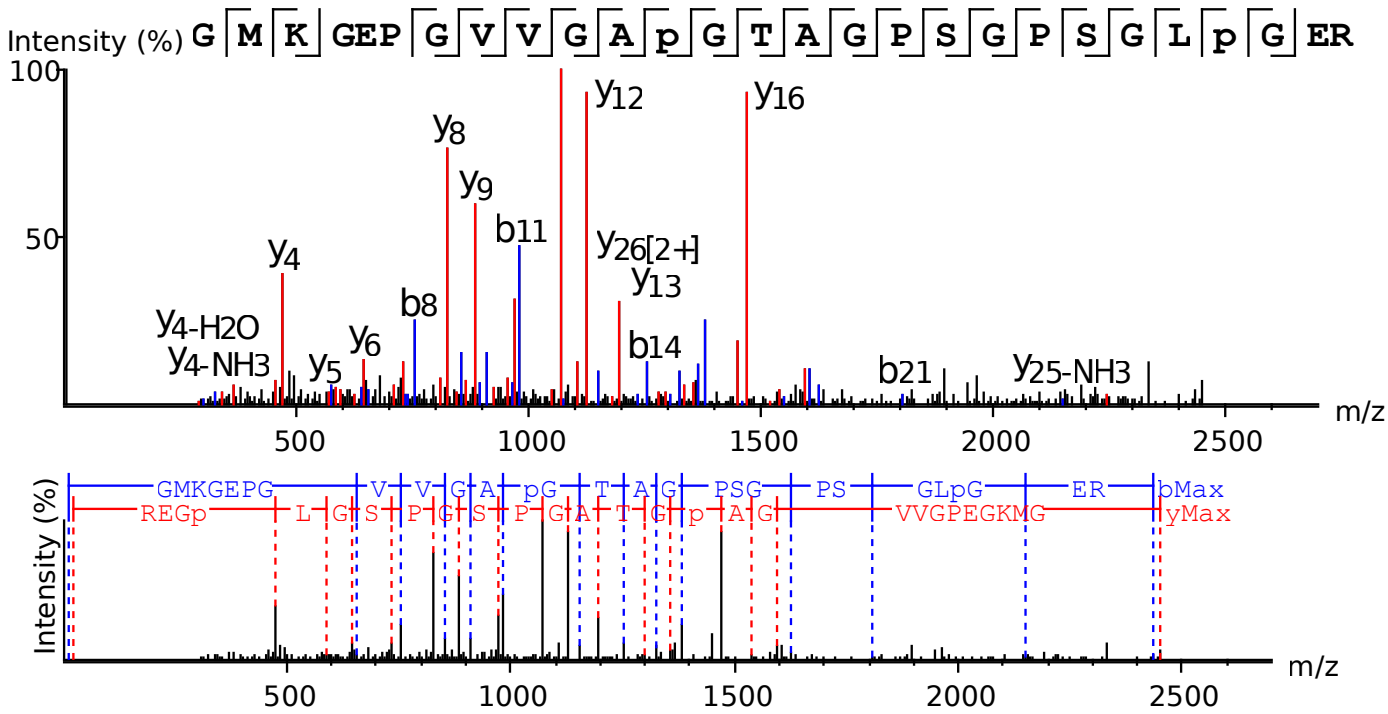

*Toxodon* sp.

York13 - 1702

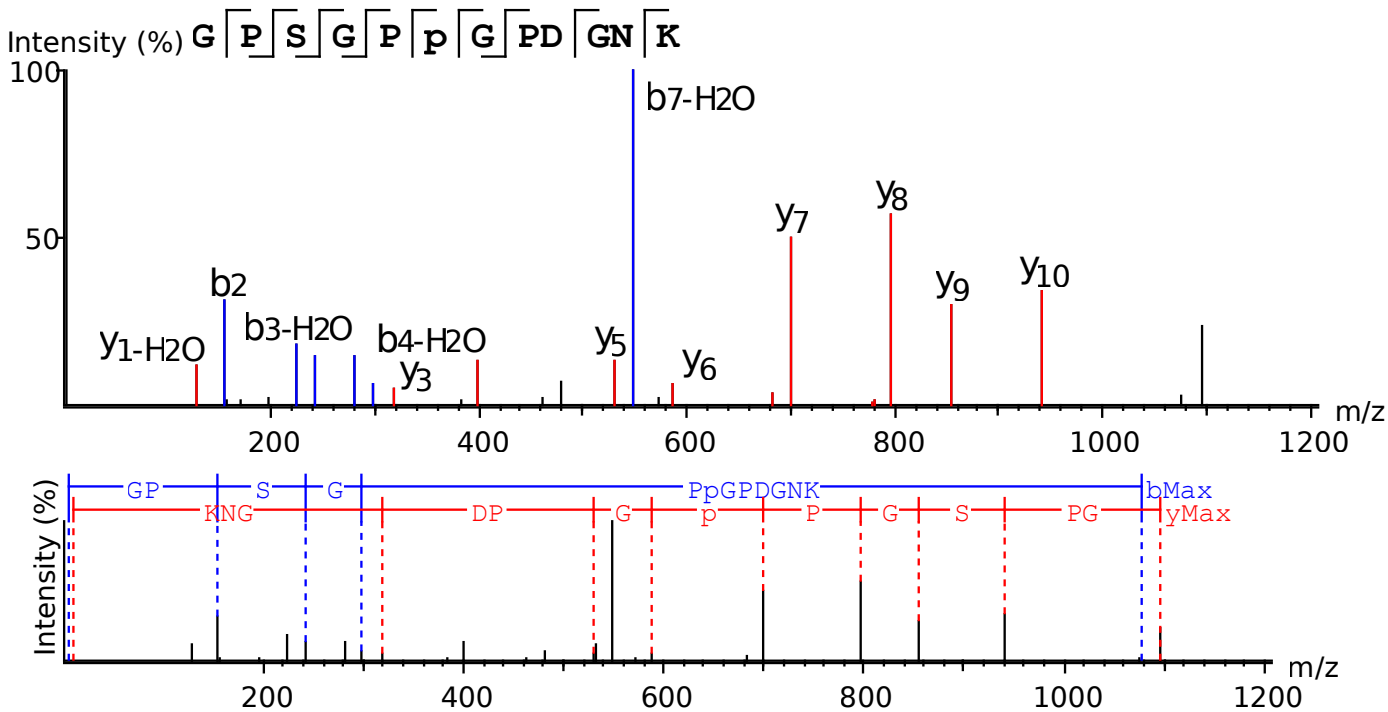

*Toxodon* sp.

York12 - 9194

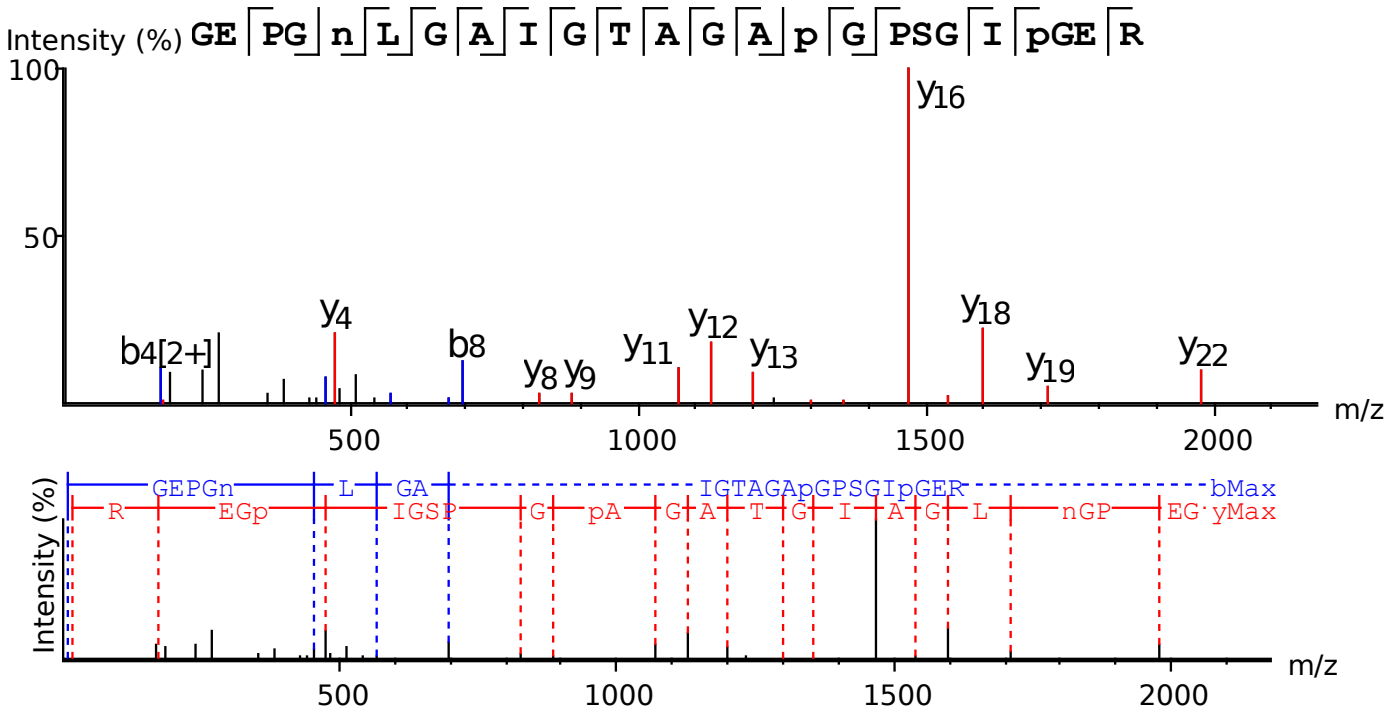

Col1α2 563

*Macrauchenia* sp.

York15 - 4801

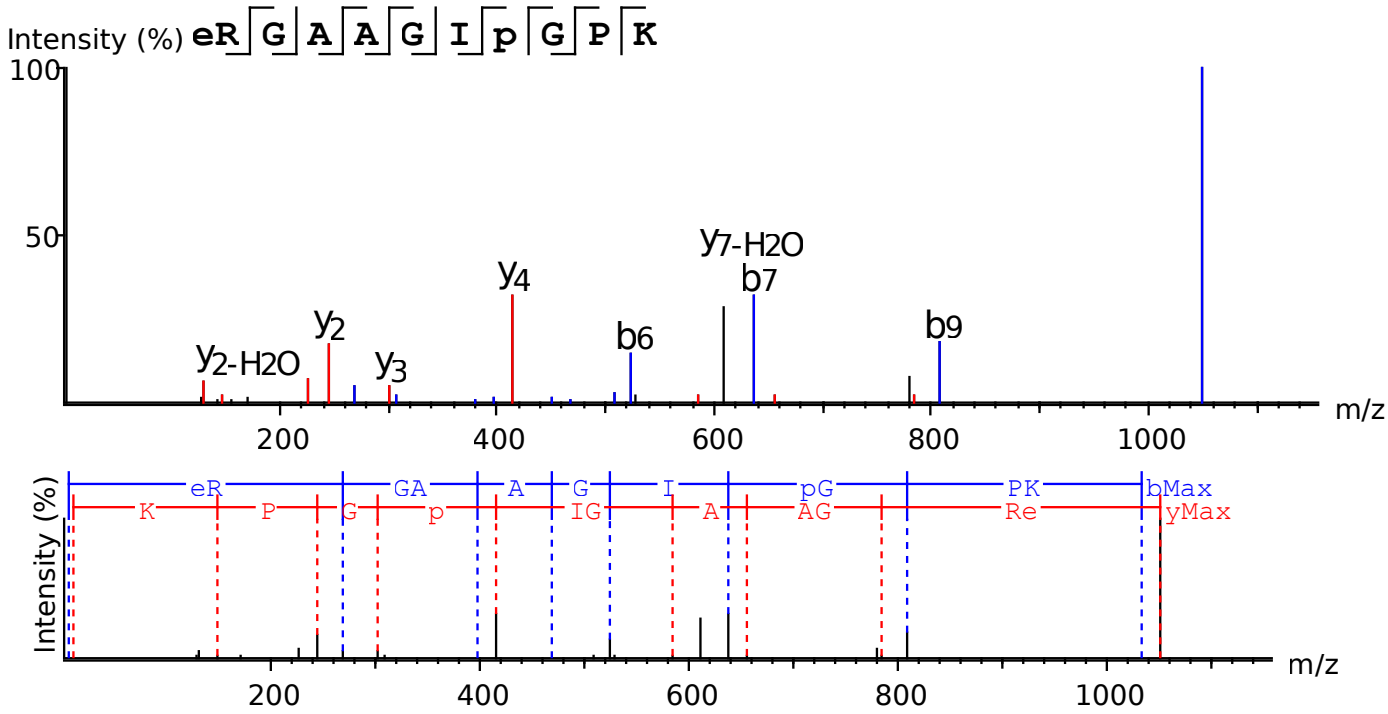

*Toxodon* sp.

York12 - 4408

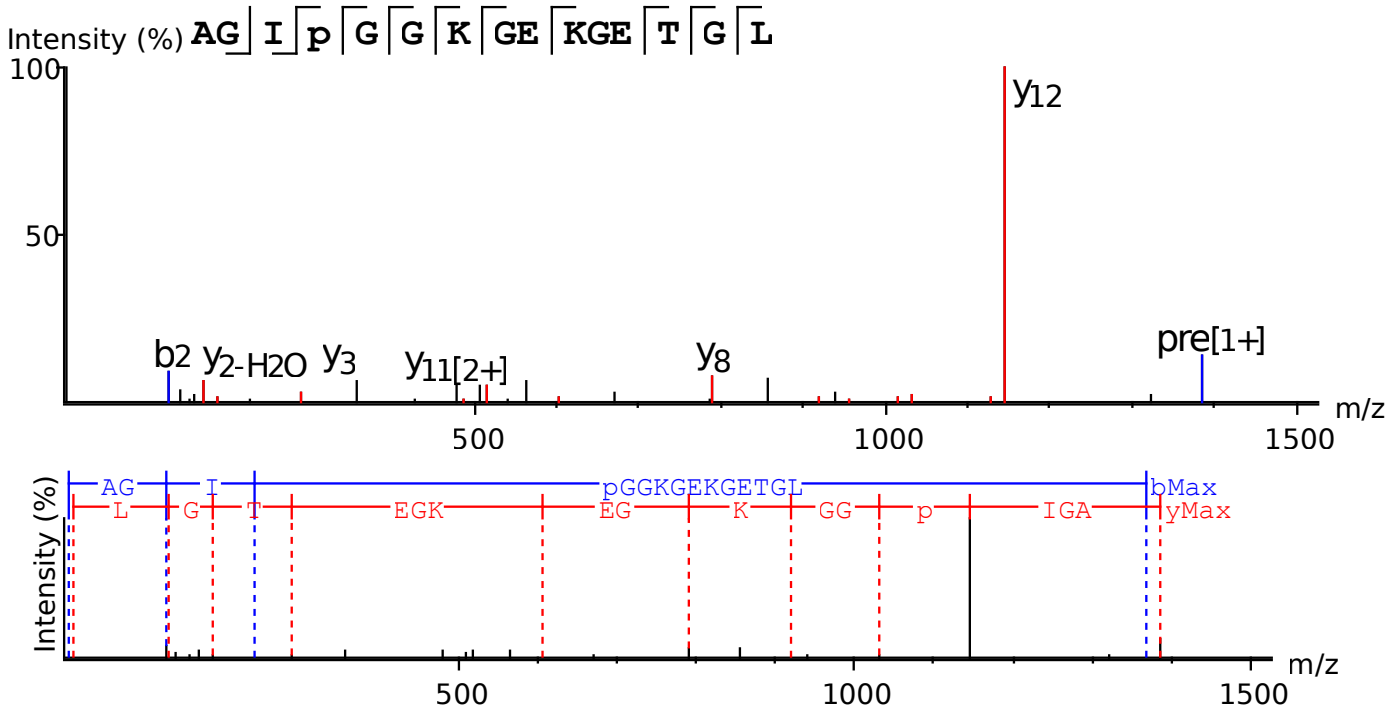

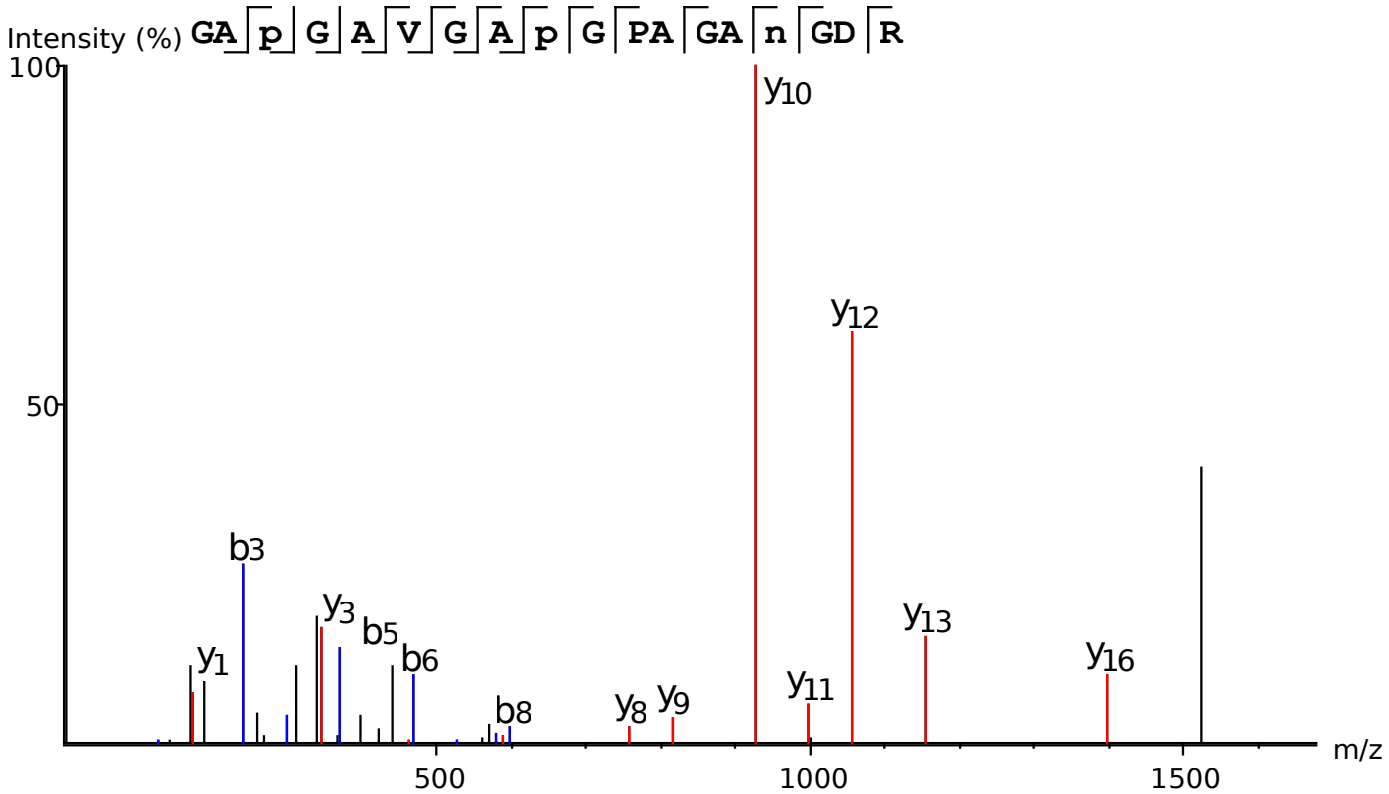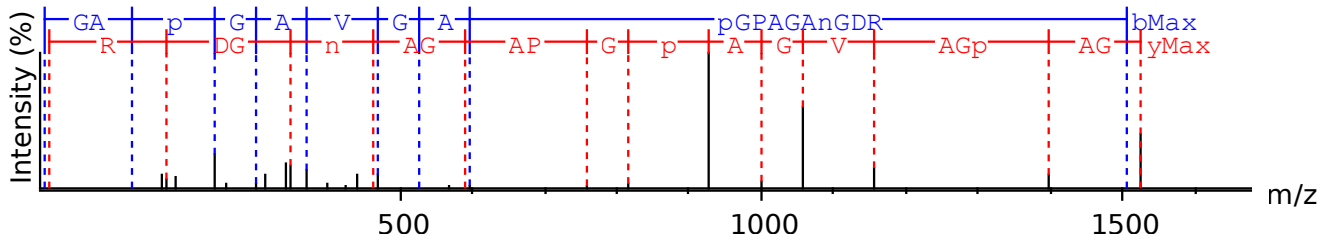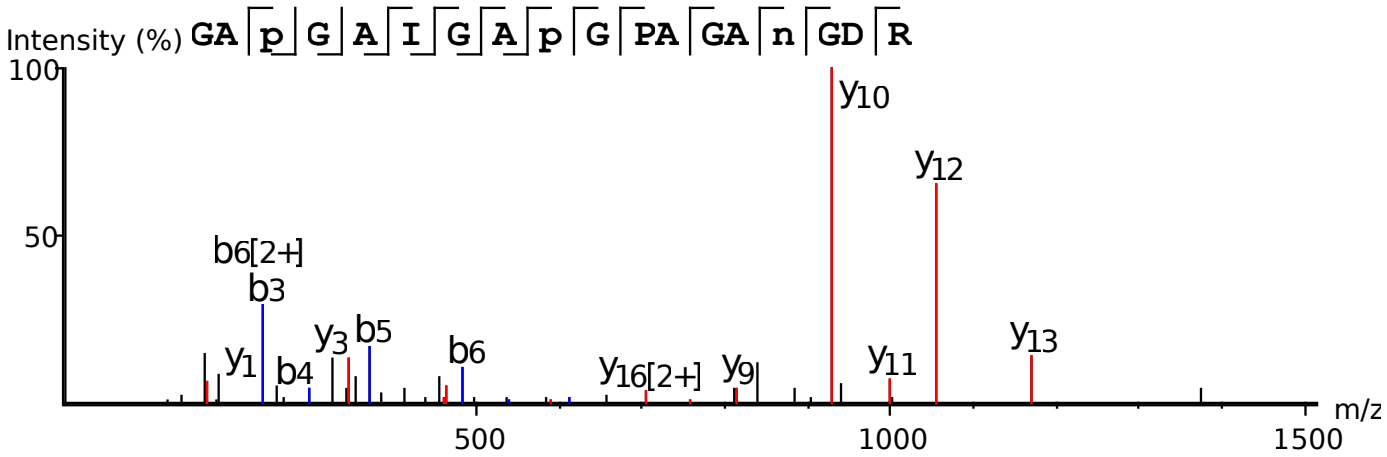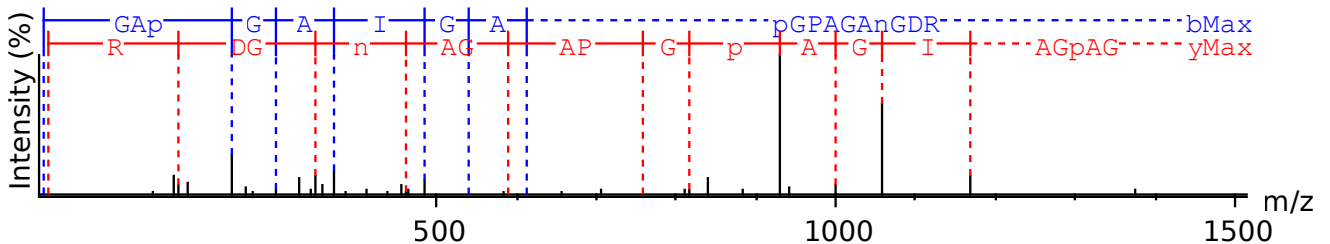

Col1α2 671

*Macrauchenia* sp.

York15 - 5067

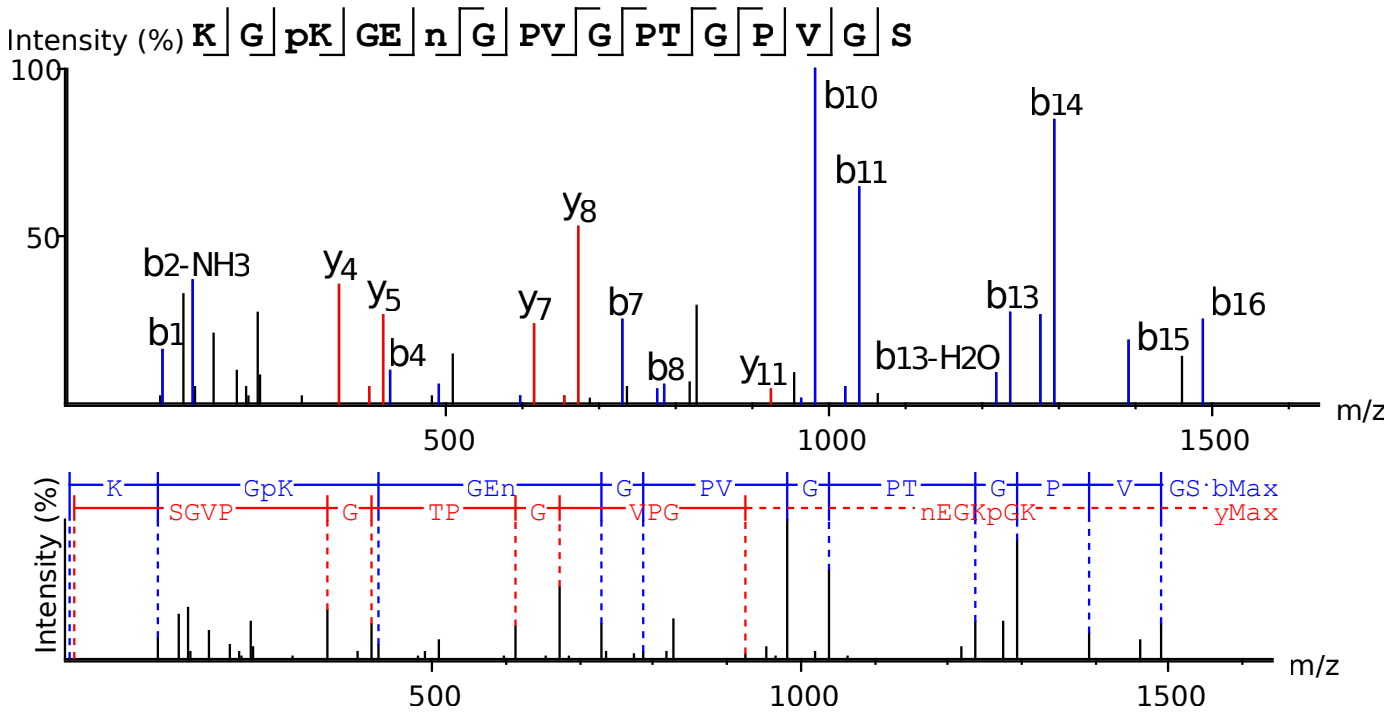

*Toxodon* sp.

MLP2012.04 - 8866

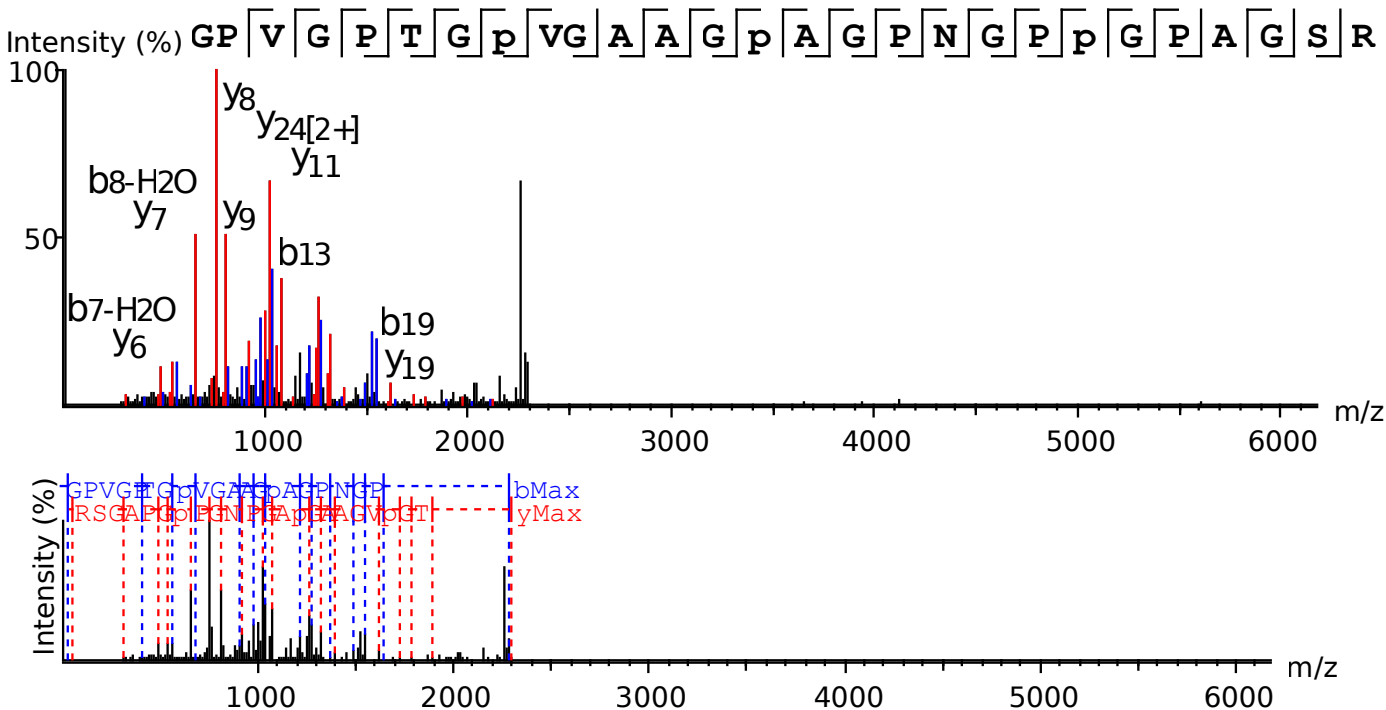

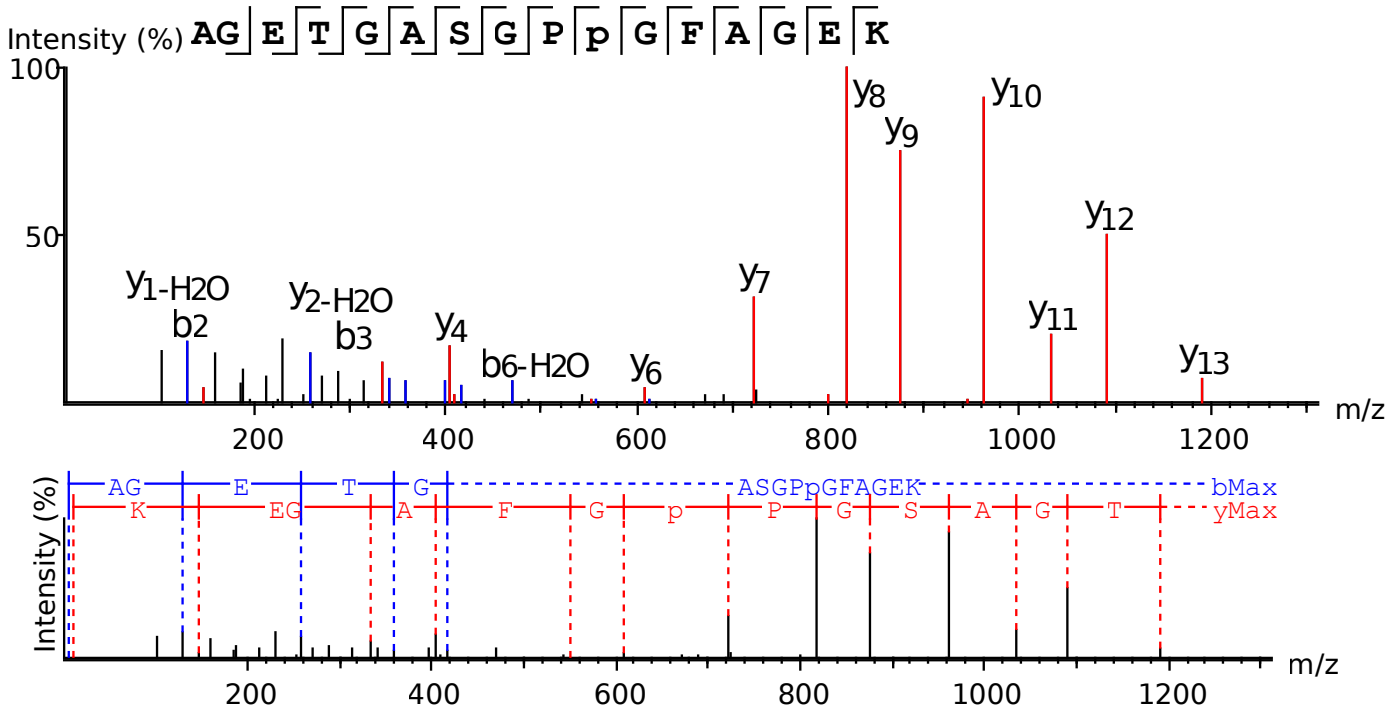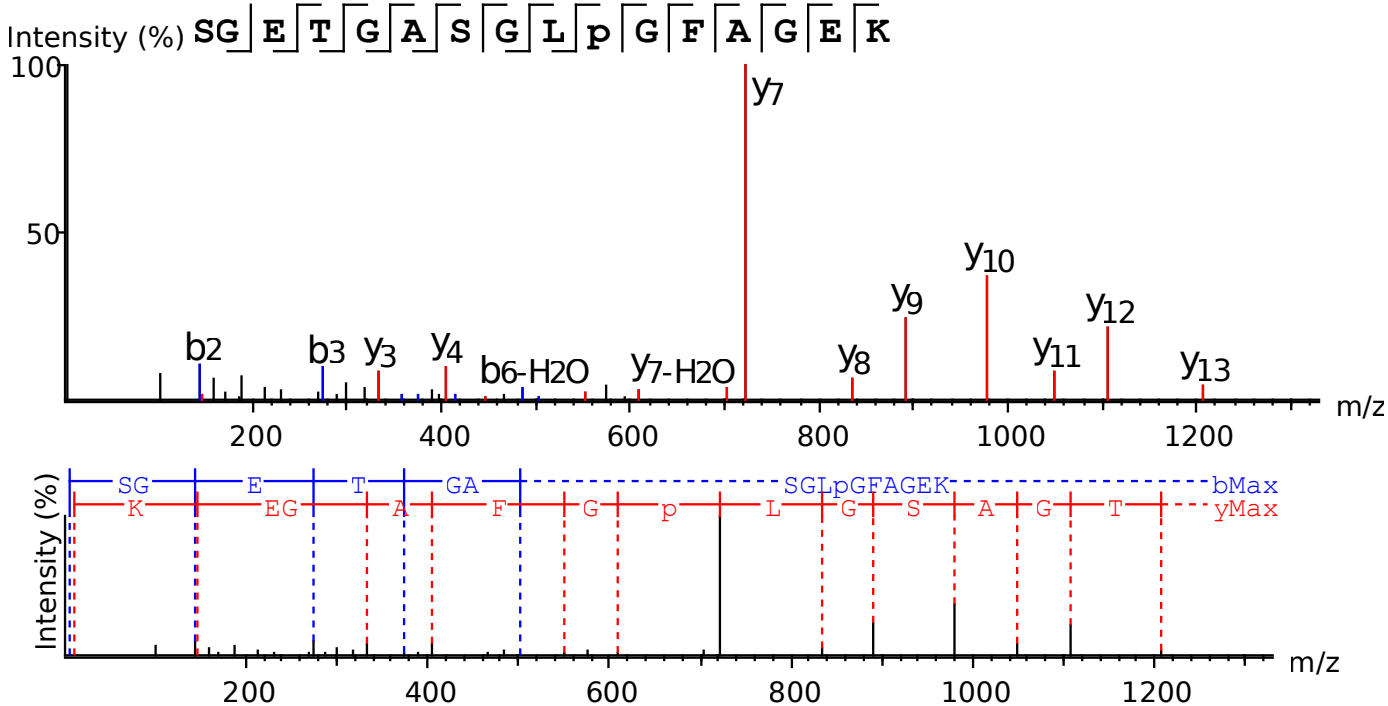

Col1α2 759

*Macrauchenia* sp.

York15 - 5892

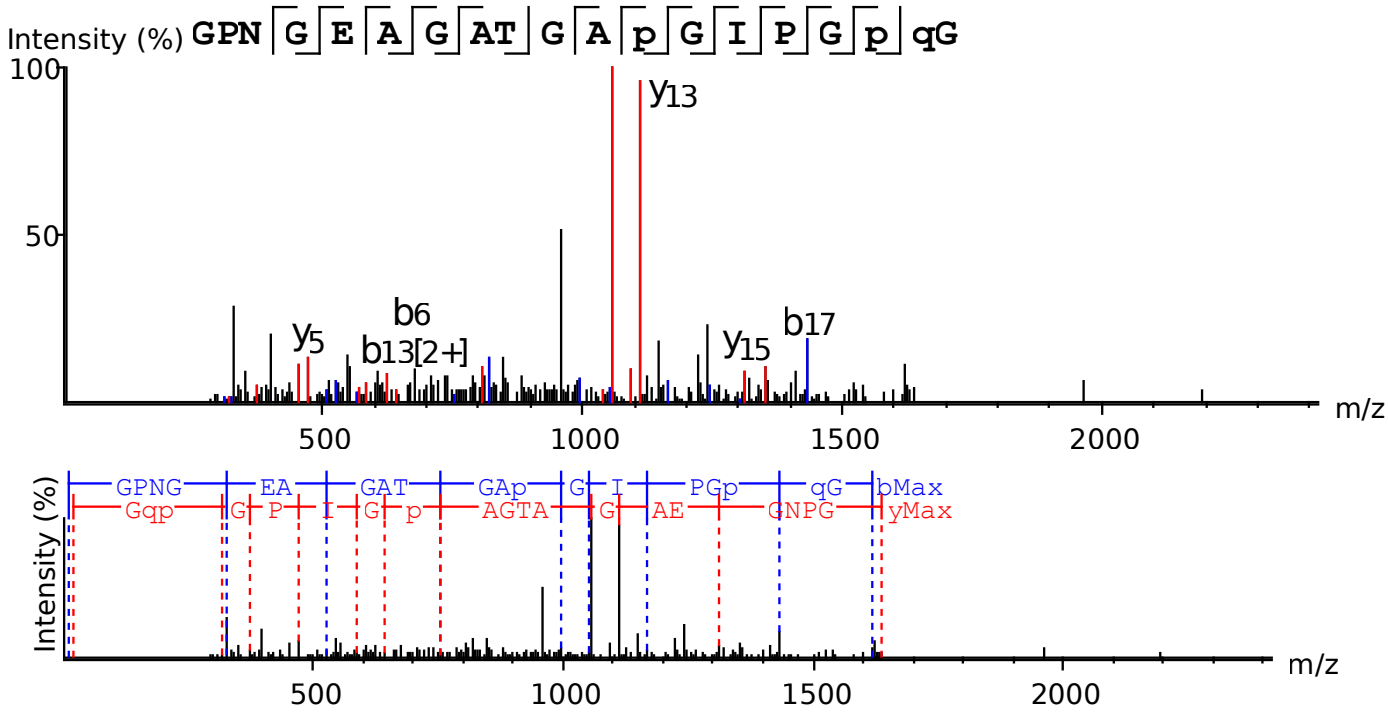

*Toxodon* sp.

York13 - 8479

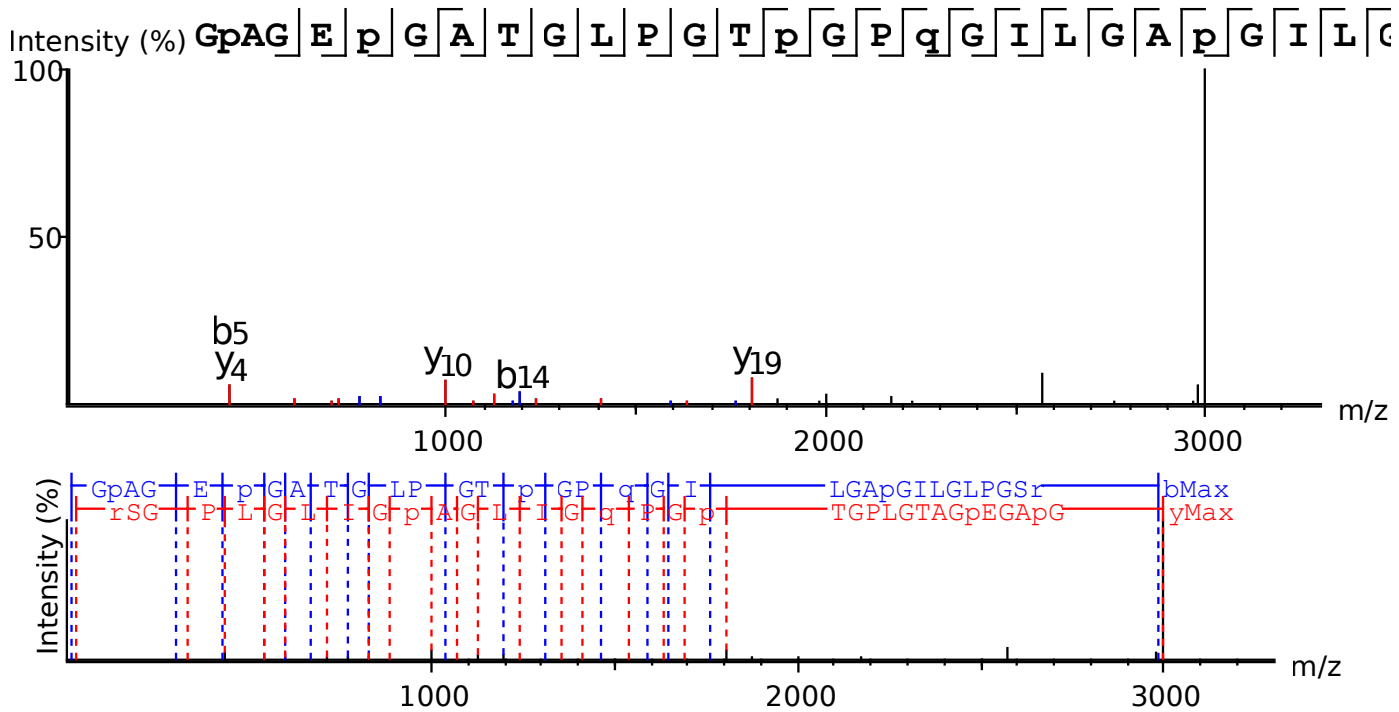



Col1α2 801

*Macrauchenia* sp.

York15 - 12821

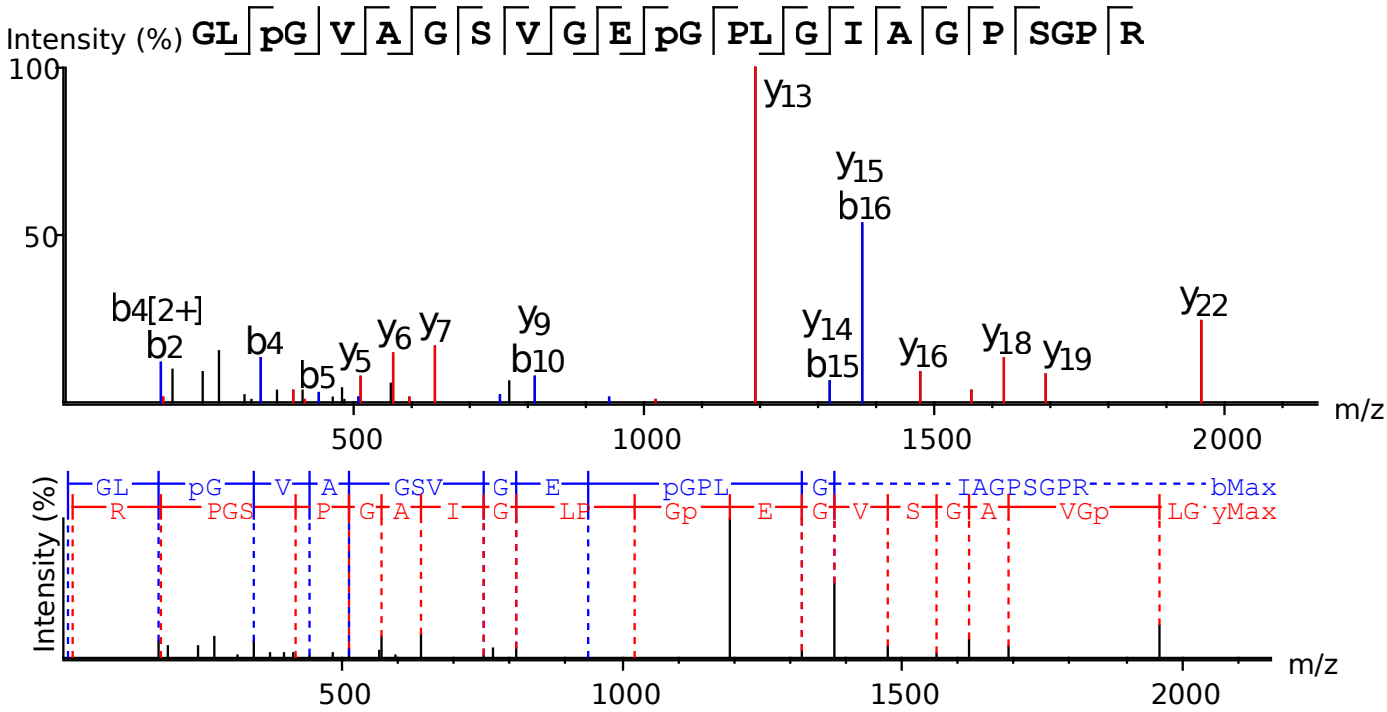

*Toxodon* sp.

York13 - 13872

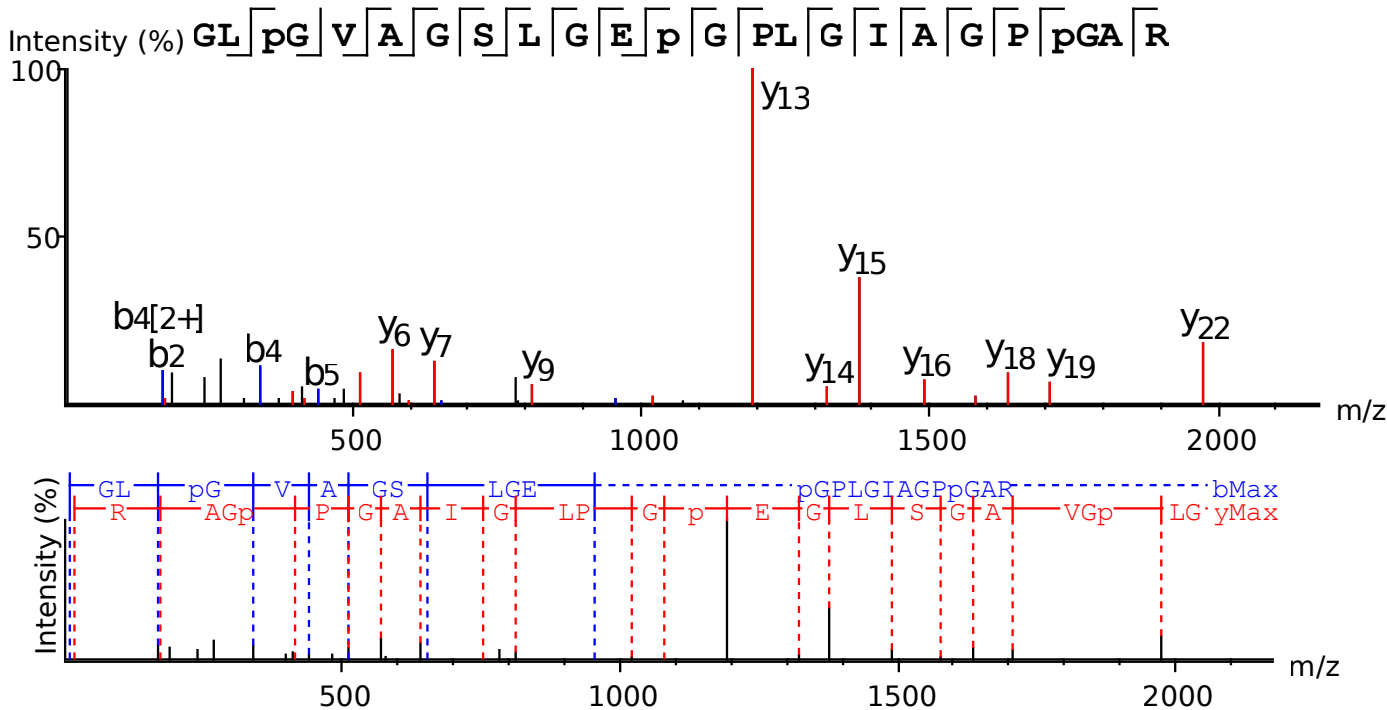

Intensity (%) **G** **P** **p** **G** **A** **V** **G** **S** **p** **GV** **n** **G** **A** **pGE** **AGR**

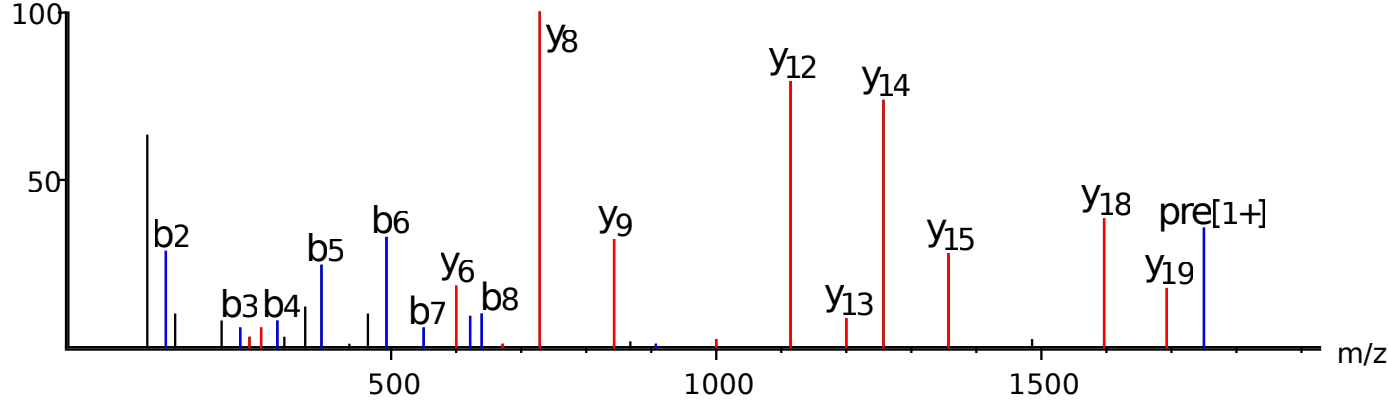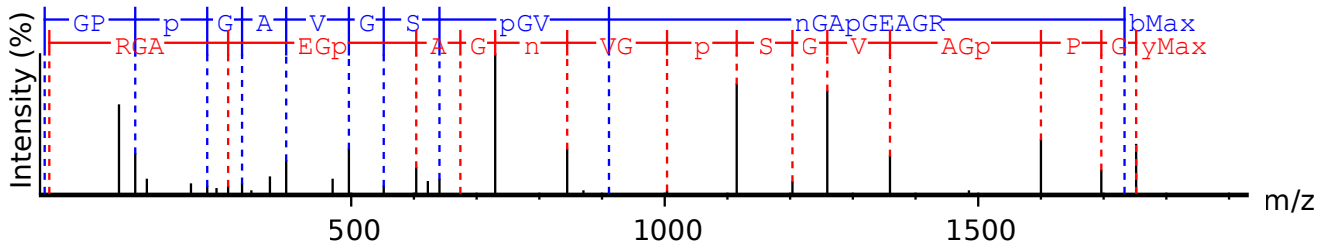

Intensity (%) **GP** **p** **G** **A** **V** **G** **N** **p** **GV** **N** **G** **A** **pGE** **A** **GR**

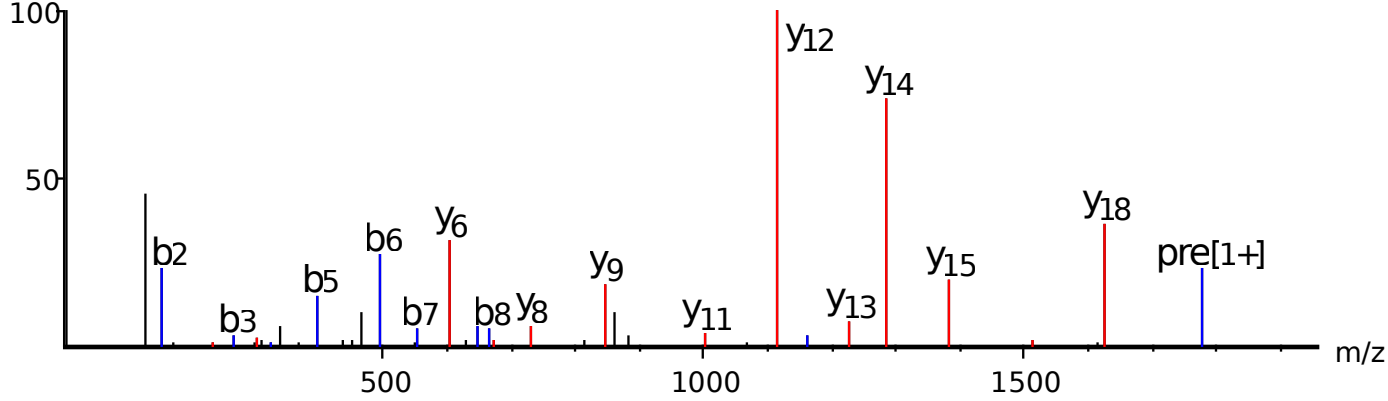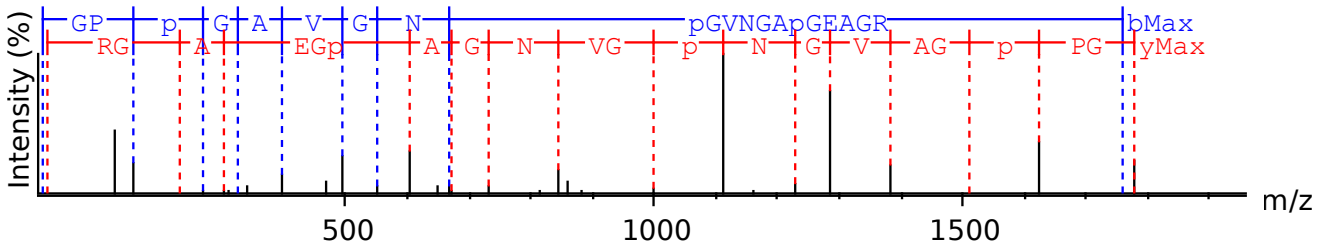

Intensity (%) H [G] [nR] [GE] [pG] [P] [V] [G] [S] [V] [G] [P] [A] [GAV] [GPR]

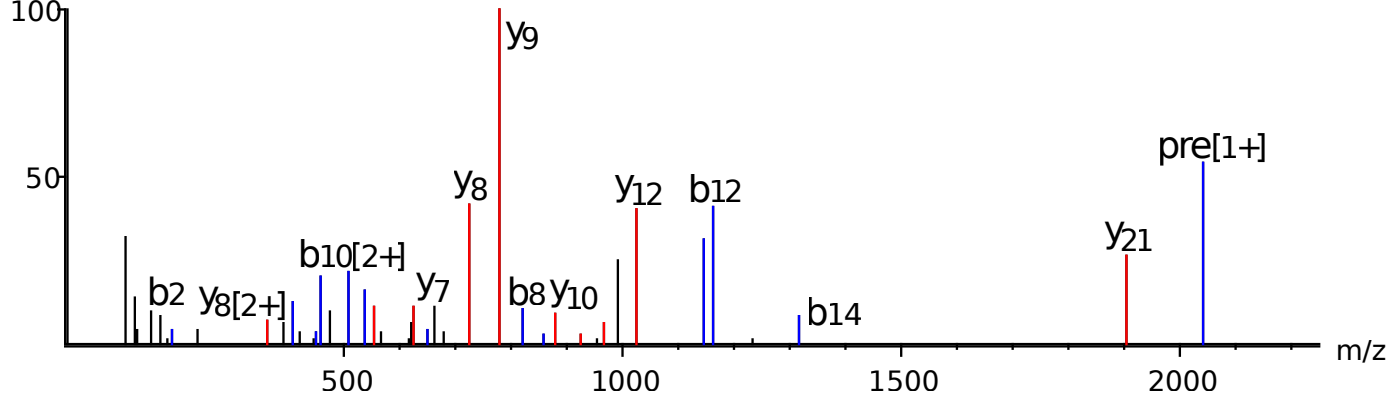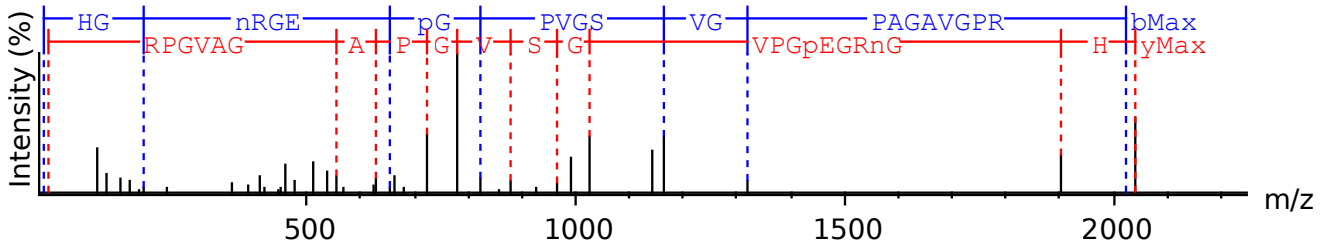

*Toxodon* sp.

Intensity (%) RGE [pG] [P] [A] [G] [S] [V] [G] [P] [A] [G] [A] [V] [G] [PR]

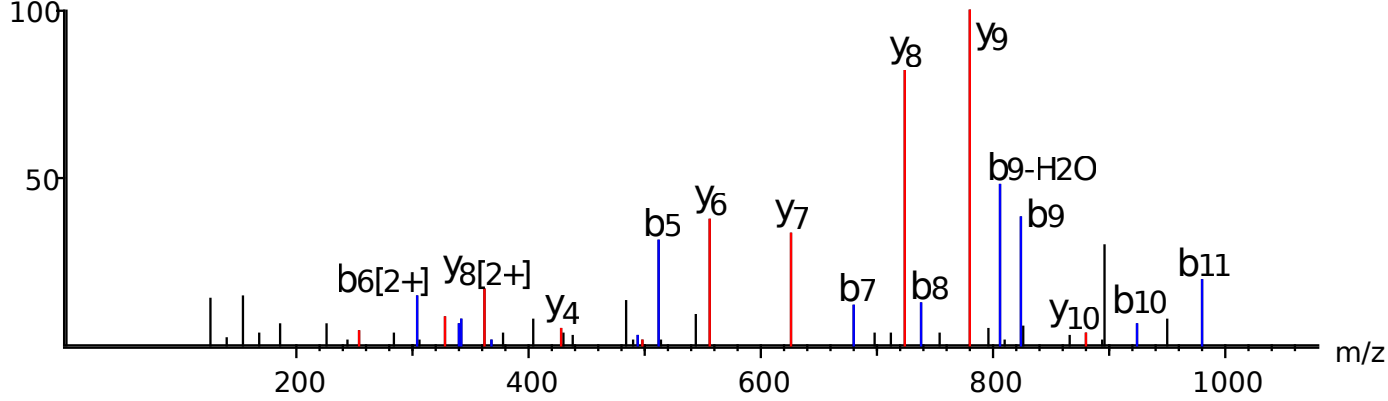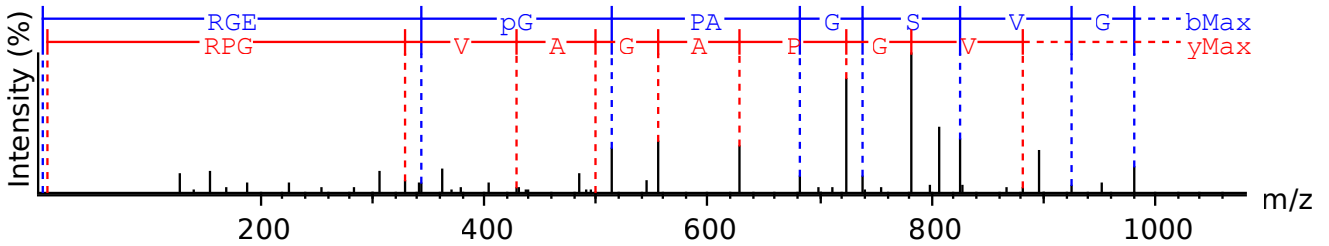

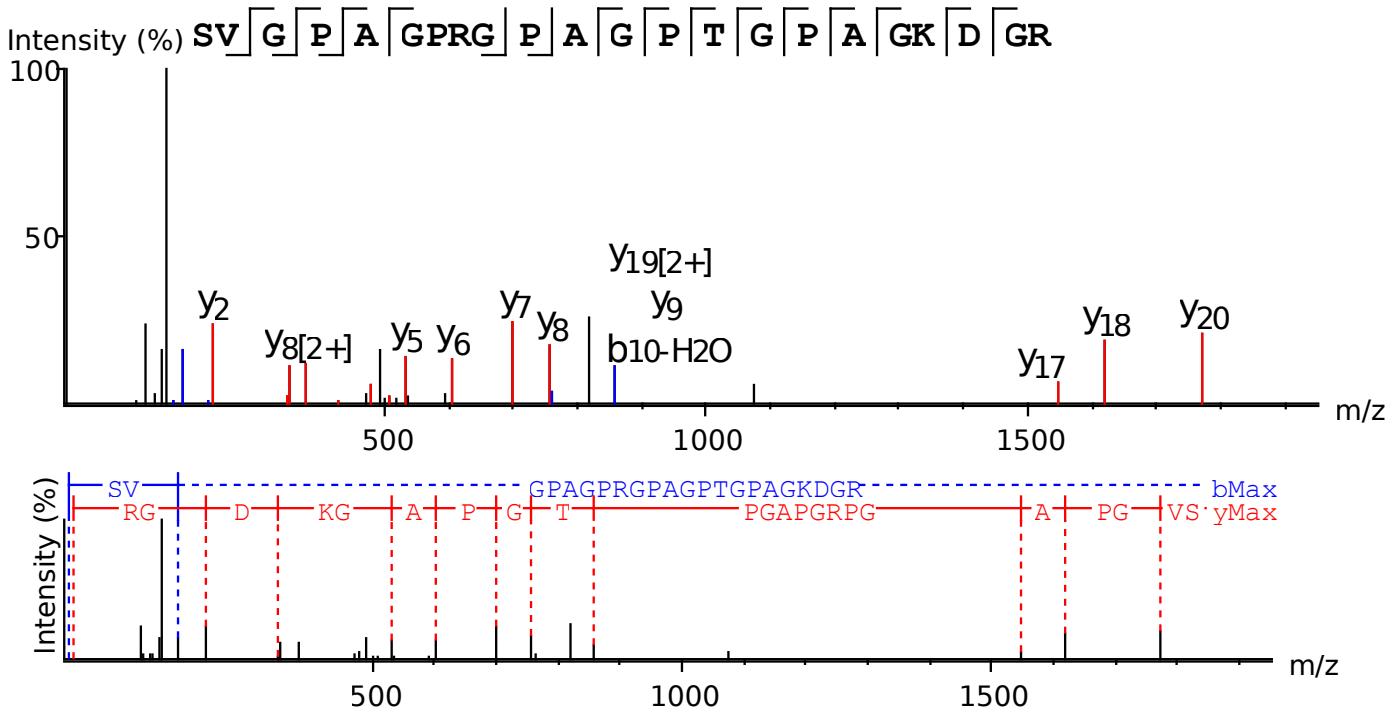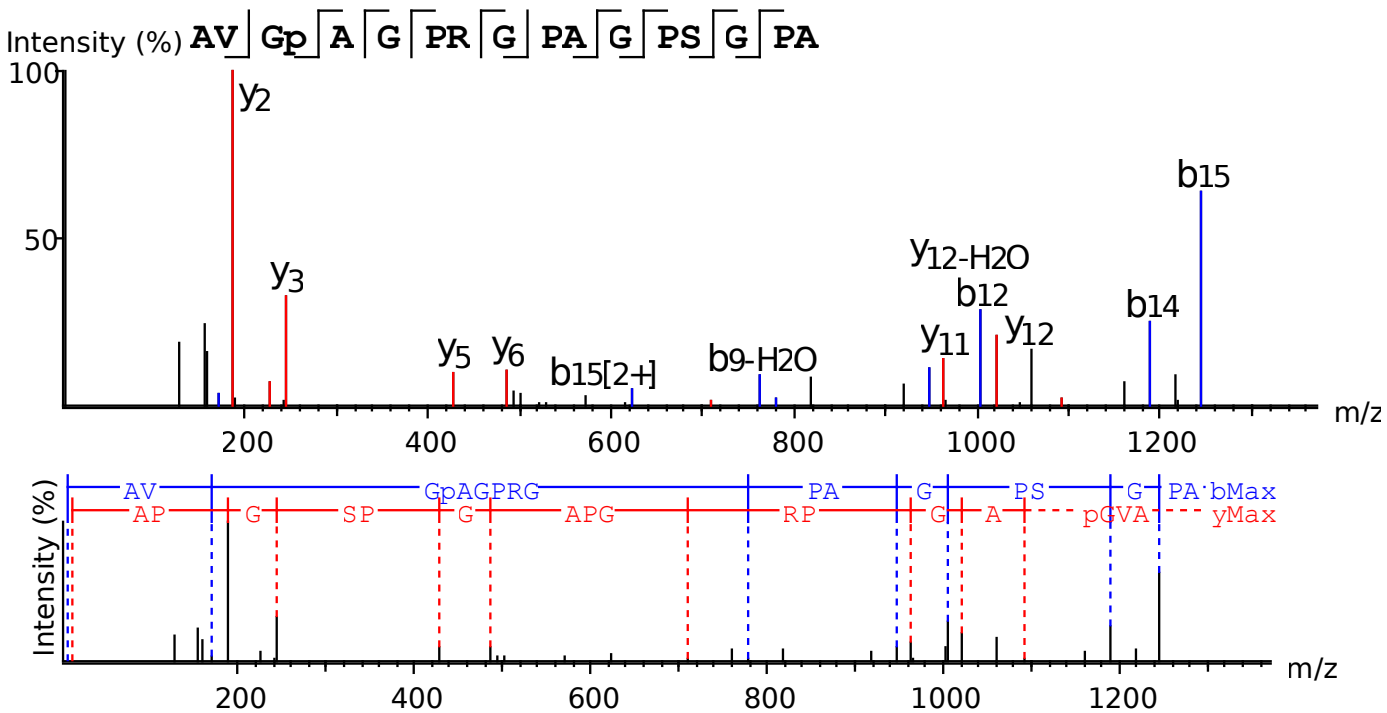

Col1α2 983

*Macrauchenia* sp.

York15 - 6317

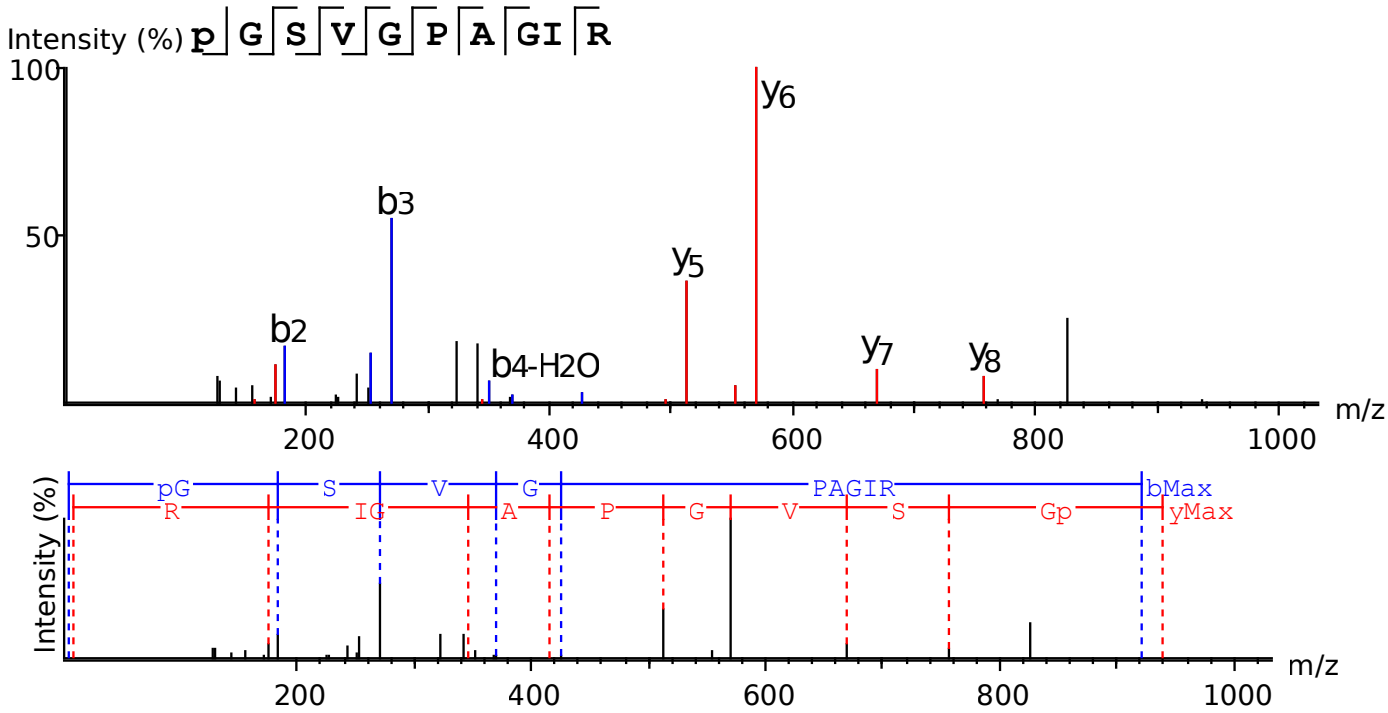

*Toxodon* sp.

York13 - 5316

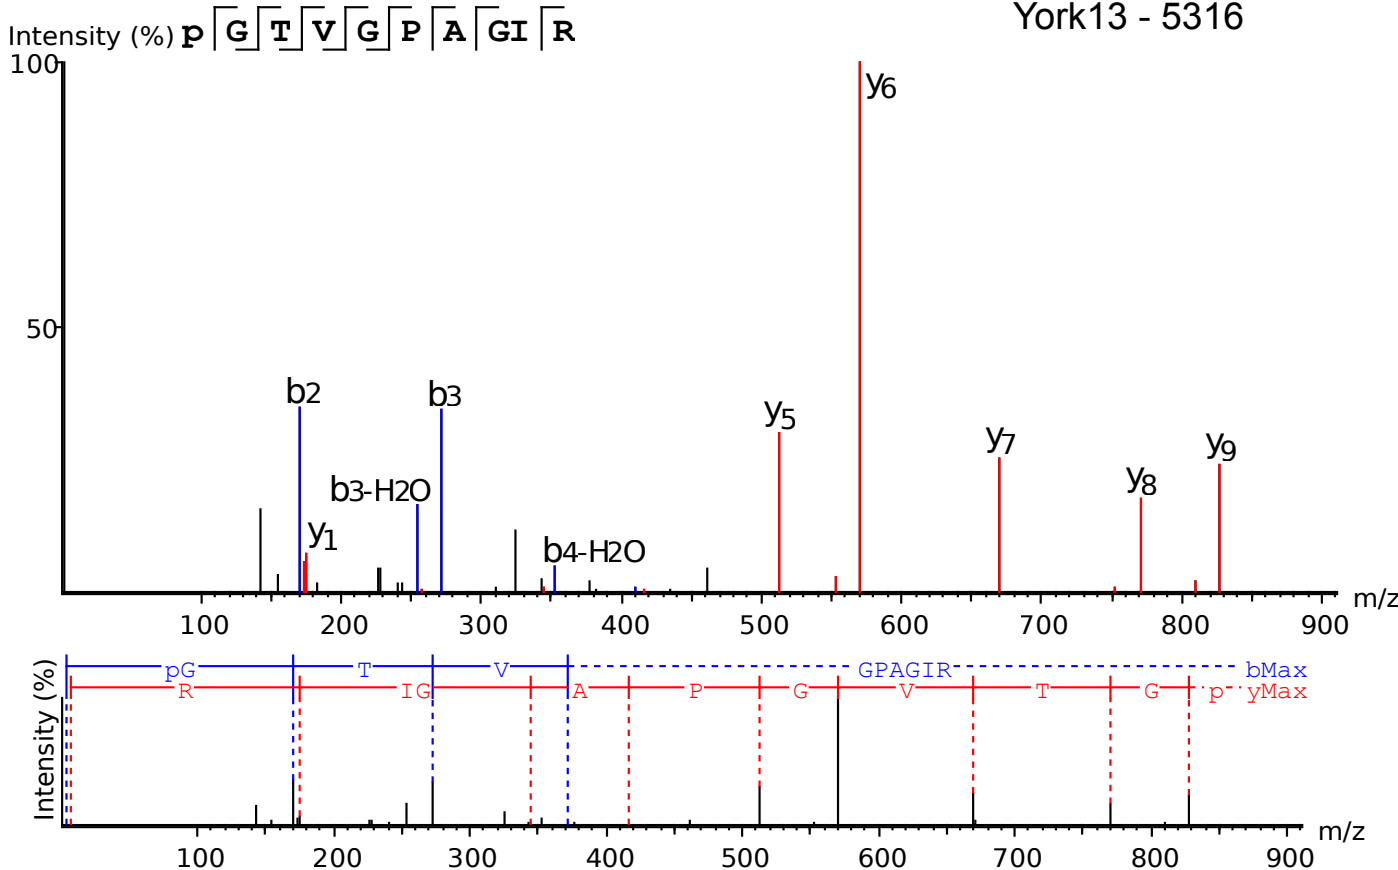

Supplement: 41586_2015_BFnature14249_MOESM5_ESM.pdf [file 41586_2015_BFnature14249_MOESM5_ESM.pdf]
