# Supplementary material for: Ancient proteins resolve the evolutionary history of Darwin’s South American ungulates
Source: Springer Nature journal article supplement (doi:10.1038/nature14249), 2015-03-18
Supplement: 41586_2015_BFnature14249_MOESM4_ESM.pdf [file 41586_2015_BFnature14249_MOESM4_ESM.pdf]

## 1. Materials

### 1.1 Specimens (Fossil and Directly Sequenced Modern)

The full list of SANU specimens sampled for collagen analysis is provided in Extended Data Table 1 (total of 22 *Toxodon* and 26 *Macrauchenia* extractions). Before sampling, all SANU fossils used in this study could be satisfactorily allocated to either *Toxodon* or *Macrauchenia* on the basis of distinctive morphological features. To represent each SANU, two high-quality specimens were selected and their collagen directly sequenced; this information was then used to construct consensus sequences as explained in the Methods section Phylogenetic Reconstruction. A sample from each of the high-quality specimens was submitted for radiocarbon dating (Extended Data Table 1).

To improve the taxonomic resolution of our comparative collagen type I database, we also directly sequenced samples representing several extant taxa: silky anteater (*Cyclopes didactylus*, AMNH 99199); South American tapir (*Tapirus terrestris*, Zoological Museum, Natural History Museum of Denmark), hippopotamus (*Hippopotamus amphibius*, Zoological Museum, Natural History Museum of Denmark), and aardvark (*Orycteropus afer*, AMNH 51910). In addition, to validate our approach we sequenced and assembled COL1 sequences for two fossil specimens relevant to our study. These were (i) a laurasiathere (*Equus* sp., MACN Pv 5719), from a locality in the Tapalqué area, which also yielded many of our SANU specimens, and (ii) a xenarthran (*Myiodon darwini* MLP 94-VIII-10-32) from the famous end-Pleistocene locality of Cueva del Milodon in southern Chile (see Methods).

### 1.2 Localities

The majority of the SANU specimens used in the analyses were collected in the late 19<sup>th</sup> or early 20<sup>th</sup> centuries; some lack adequate locality and stratigraphic data (Extended Data Table 1). Most specimens probably represent the common Pleistocene species *T. platensis* and *M. patachonica*, but as museum labels generally record genus only, we reference our samples as *Toxodon* sp. and *Macrauchenia* sp. in the text.

Almost all of the specimens for which some locality information exists come from the province of Buenos Aires, mostly from areas fairly close to the Atlantic coast. Localities on labels generally refer only to rivers or towns, in or near which it may be assumed collecting took place, although for some specimens, museum catalogs provided additional geographical information. The distribution of all known localities and estimates of their thermal age are provided in Extended Data Table 1.

### 1.3 Dating

On museum labels, specimens were generally allocated to “Formación Pampeana” or “Lujanense,” stratigraphic and land-mammal age designations that were used interchangeably in the past (although they are not formally coeval) to refer to the late Quaternary (i.e., 130 - 11.7 kyr) (for a discussion, including new estimates, see <sup>1</sup>). To test age inferences a limited program of radiocarbon dating was undertaken (Extended Data Table 1). Both of the high-quality *Toxodon* samples (MLP 44-XII-29-5 and MACN Pv 17710) returned relatively young age estimates that fell at or close to the Pleistocene/Holocene transition and are among the youngest known for this taxon (Anthony Barnosky, pers. commun., 9.22.2014). By contrast, the two high-quality *Macrauchenia* samples (MLP 96-V-10-19 and MACN Pv 18952) did not return AMS radiocarbon dates, despite yielding collagen adequate for sequencing by MS/MS.

This highlights the difference between radiocarbon analysis and protein sequencing with regard to limits of detection: in MS/MS analysis, peptides can be released and sequenced from samples unsuitable for radiocarbon dating because of contamination by tannins and humic acids.

### 1.4 Thermal Age

Thermal age<sup>2</sup> is a means of providing comparative age estimates which normalise for differences in the thermal history of fossils, and reports them as ages assuming all had been held at a constant 10 °C, ie.  $age_{ka@10^{\circ}C}$ ; thermal ages for this paper were estimated using the online tool [www.thermal-age.eu](http://www.thermal-age.eu). Seasonal fluctuations in monthly temperature at the sites were estimated from the WorldClim dataset<sup>3</sup>. The extent to which temperature decreased prior to the Holocene was estimated from the difference in the 1° × 1° PIMP2 grid for the region at three time intervals: Modern (pre-industrial), Holocene (6ka) and LGM<sup>4</sup>. These data were correlated against the equivalent time intervals from estimated fluctuations in air temperature over the last 800ka<sup>5</sup>, and the correlation used to transform the latter temperature series to reflect the temperature change in this region.

Thermal age estimates are reported in Extended Data Table 1, and we used relative rates of molecular degradation based upon the temperature dependence of DNA depurination from <sup>6</sup> and the rate data estimated in bone from <sup>7</sup>. We lack detailed site information for most fossils (Supplemental Information 1.2) and consequently data on sediment type, levels of hydration and burial depth over time, as well as storage history. For all samples we therefore used a thermal diffusivity for sediments of 0.04844 (m<sup>2</sup> day<sup>-1</sup>), a depth of 1.25 m, and ignored museum storage.

## 2. Methods Tables

**Table S1. PCR primers to target Laurasiatheria and Perissodactyla specific mtDNA.**

### Perissodactyla

| Gene | Start | End  | Size | Forward Primer         | Reverse Primer           | Tm1  | Tm2  |
|------|-------|------|------|------------------------|--------------------------|------|------|
| COI  | 274   | 325  | 51   | ATAGCATTCCCCGAATAAA    | TGATGGTGGGAGGAGTCAGA     | 58.4 | 61.7 |
| COI  | 1175  | 1230 | 55   | ATTCGTCCACTGATTCCCCTTA | TGCTCAGGTTTGGTTGAGTG     | 61.9 | 59.9 |
| COI  | 1212  | 1453 | 241  | CACTCAACCAAACCTGAGCA   | CTGTAGACTTCTCGTTTGG      | 59.9 | 53.5 |
| CytB | 7     | 117  | 110  | AACATCCGGAAATCTCACC    | TTCCTAGGAGGAGCCGAAG      | 57.4 | 63.0 |
| CytB | 112   | 195  | 83   | AGGAATCTGCCTAATCCTCCA  | CGGATGAGAAGGCAGTTGT      | 60.0 | 58.8 |
| CytB | 7     | 195  | 188  | AACATCCGGAAATCTCACC    | CGGATGAGAAGGCAGTTGT      | 57.4 | 58.8 |
| CytB | 786   | 851  | 65   | CAGCACTCCCCTCATATTA    | TGGAGCGTAGGATGGCGTA      | 60.3 | 62.7 |
| 16S  | 878   | 979  | 101  | CTGCCTGCCAGTGACATC     | TGGCCATTCATACAAGTCCCTA   | 62.9 | 59.3 |
| 16S  | 977   | 1196 | 219  | CACACGAGGTTTACTGTCTC   | TCACTCGGAGTTGTTTGT       | 59.3 | 58.1 |
| 16S  | 223   | 362  | 139  | TTAAGTTAAACACCCGAAACCA | TTCACCTTACCTATGAATCTTCTC | 58.1 | 56.8 |

### Laurasiatheria

| Gene | Start | End  | Size | Forward Primer           | Reverse Primer           | Tm1  | Tm2  |
|------|-------|------|------|--------------------------|--------------------------|------|------|
| 12S  | 249   | 350  | 101  | AATTAAGCCATGAACGAAAGTT   | TTAATTCGGGTTAATCGTATGAC  | 52.7 | 53.0 |
| 16S  | 1039  | 1150 | 111  | ATAAGACGAGAAGACCCTATGGAG | TCACCCCAACCTAAATTGTTA    | 57.9 | 55.1 |
| CytB | 453   | 517  | 64   | AGCAATCCCATACATCGGAAC    | CTTTGTCTACTGAGAATCCTCCTC | 58.2 | 58.4 |
| CytB | 208   | 517  | 309  | TGCCGAGACGTAAATTATGGT    | CTTTGTCTACTGAGAATCCTCCTC | 56.5 | 58.4 |

**Table S2. Comparative dataset used for phylogenetic reconstruction, referencing database sources (with accession numbers) or associated genome publication.**

| Order        | Species                       | Database | Accession COL1a1 | Accession COL1a2 |
|--------------|-------------------------------|----------|------------------|------------------|
| Aves         | <i>Gallus gallus</i>          | UniProt  | P02457           | P02467           |
| Afrosoricida | <i>Echinops telfairi</i>      | Genbank  | XM_004707059.1   | XM_004702663.1   |
| Afrosoricida | <i>Chrysochloris asiatica</i> | Genbank  | XM_006832467.1   | XP_006834349.1   |
| Carnivora    | <i>Ailuropoda melanoleuca</i> | Genbank  | XM_002923729.1   | NW_003217535.1   |
| Carnivora    | <i>Canis lupus</i>            | Genbank  | NM_001003090.1   | XM_005628344.1   |
| Carnivora    | <i>Felis catus</i>            | Genbank  | XM_003996699.1   | XM_003982764.1   |
| Carnivora    | <i>Mustela putorius</i>       | UniProt  | M3YVG8_MUSPF     | M3XR96_MUSPF     |
| Carnivora    | <i>Odebenus rosmarus</i>      | Genbank  | XM_004395150.1   | XM_004394078.1   |
| Carnivora    | <i>Leptonychotes weddelli</i> | Genbank  | XP_006740794     | XP_006730730     |
| Carnivora    | <i>Panthera tigris</i>        | Genbank  | XM_007086767.1   | XM_007076695.1   |
| Artiodactyla | <i>Bos primigenius</i>        | UniProt  | CO1A1_BOVIN      | CO1A2_BOVIN      |
| Artiodactyla | <i>Bubalus bubalis</i>        | Genbank  | XP_006041214.1   | XP_006054012.1   |

|                 |                                   |                 |                                               |                                                            |
|-----------------|-----------------------------------|-----------------|-----------------------------------------------|------------------------------------------------------------|
| Artiodactyla    | <i>Pantholops hodgsonii</i>       | Genbank         | XP_005964709                                  | XP_005985745                                               |
| Artiodactyla    | <i>Hippopotamus amphibius</i>     |                 | This study                                    | This study                                                 |
| Artiodactyla    | <i>Orcinus orca</i>               | Genbank         | XM_004282622.1                                | XM_004265587.1                                             |
| Artiodactyla    | <i>Sus scrofa</i>                 | ENSEMBL         | ENSSSCG00000017581                            | ENSSSCG00000015326                                         |
| Artiodactyla    | <i>Ovis aries</i>                 |                 | International Sheep Genomics Consortium, 2010 | International Sheep Genomics Consortium, 2010 <sup>8</sup> |
| Artiodactyla    | <i>Tursiops truncatus</i>         | Genbank         | XM_004313715.1                                | XM_004327093.1                                             |
| Artiodactyla    | <i>Physeter catodon</i>           | Genbank         | XM_007128545.1                                | XM_007105299.1                                             |
| Artiodactyla    | <i>Camelus bactrianus</i>         | Genbank         | XM_006174954.1                                | XM_006178536.1                                             |
| Artiodactyla    | <i>Vicugna pacos</i>              | Genbank         | XM_006218653.1                                | XM_006207629.1                                             |
| Chiroptera      | <i>Myotis davidii</i>             | Genbank         | XP_006774459.1                                | XP_006779282.1                                             |
| Chiroptera      | <i>Myotis lucifugus</i>           | Genbank         | XP_006105322.1                                | XP_006085025.1                                             |
| Chiroptera      | <i>Myotis davidii</i>             | Genbank         | XP_006774459.1                                | XP_006779282.1                                             |
| Chiroptera      | <i>Pteropus alecto</i>            | Genbank         | XM_006924793.1                                | XM_006911910.1                                             |
| Chiroptera      | <i>Pteropus vampyrus</i>          | Genbank         | GCA_000151845.1                               | GCA_000151845.1                                            |
| Chiroptera      | <i>Eptesicus fuscus</i>           | Genbank         | XP_008151928.1                                | XP_008147219.1                                             |
| Cingulata       | <i>Dasybus novemcinctus</i>       | Genbank         | XM_004484849.1                                | XM_004470707.1                                             |
| Dasyuromorphia  | <i>Sarcophilus harrisii</i>       | Genbank         | XM_003768375.1                                | XM_003775331.1                                             |
| Didelphimorphia | <i>Monodelphis domestica</i>      | ENSEMBL         | ENSMODG00000011945                            | ENSMODG00000016732                                         |
| Diprotodontia   | <i>Macropus eugenii</i>           |                 | Renfree et al. 2011 <sup>9</sup>              | Renfree et al. 2011 <sup>9</sup>                           |
| Hyracoidea      | <i>Procavia capensis</i>          | ENSEMBL         | ENSPCAG00000011915                            | ENSPCAG00000002641                                         |
| Lipotyphla      | <i>Condylura cristata</i>         | Genbank         | XM_004684338.1                                | XM_004676693.1                                             |
| Lipotyphla      | <i>Erinaceus europaeus</i>        | Genbank         | GCA_000296755.1                               | GCA_000296755.1                                            |
| Lipotyphla      | <i>Sorex araneus</i>              | Genbank         | XM_004608670.1                                | XM_004602187.1                                             |
| Lagomorpha      | <i>Oryctolagus cuniculus</i>      | UniProt/Genbank | G1T4A5                                        | NM_001195668.1                                             |
| Lagomorpha      | <i>Ochotona princeps</i>          | Genbank         | XP_004591119                                  | XP_004582363                                               |
| Macroscelidea   | <i>Elephantulus edwardii</i>      | Genbank         | XP_006889362.1                                | XP_006891537.1                                             |
| Monotremata     | <i>Ornithorhynchus anatinus</i>   | UniProt         | F7ESN3_ORNAN                                  | F6UFX0_ORNAN                                               |
| Perissodactyla  | <i>Ceratotherium simum</i>        | Genbank         | XM_004434679.1                                | XM_004431356.1                                             |
| Perissodactyla  | <i>Equus asinus</i>               | Genbank         | FJ594763.1                                    | FJ594764.1                                                 |
| Perissodactyla  | <i>Equus caballus</i>             | Genbank         | XM_005597481.1                                | XM_005609220.1                                             |
| Perissodactyla  | <i>Tapirus terrestris</i>         |                 | This study                                    | This study                                                 |
| Perissodactyla  | <i>Equus sp.</i> (Pleistocene)    |                 | This study                                    | This study                                                 |
| Pilosa          | <i>Choloepus hoffmanni</i>        | ENSEMBL         | (Absent)                                      | ENSCHOG00000000328                                         |
| Pilosa          | <i>Mylodon darwini</i>            |                 | This study                                    | This study                                                 |
| Pilosa          | <i>Glossotherium sp.</i>          |                 | This study                                    | This study                                                 |
| Primates        | <i>Homo sapiens</i>               | Genbank         | NM_000088.3                                   | NM_000089.3                                                |
| Primates        | <i>Macaca mulatta</i>             | Genbank         | XM_001096194.2                                | NM_001266337.1                                             |
| Primates        | <i>Microcebus murinus</i>         | ENSEMBL         | ENSMICG000000007252                           | ENSMICG000000008483                                        |
| Primates        | <i>Nomascus leucogenys</i>        | Genbank         | XM_003281260.2                                | XM_003252507.2                                             |
| Primates        | <i>Otolemur garnettii</i>         | Genbank         | XM_003786490.1                                | XM_003782677.1                                             |
| Primates        | <i>Pan paniscus</i>               |                 | Prado-Martinez et al. 2013 <sup>10</sup>      | Prado-Martinez et al. 2013 <sup>10</sup>                   |
| Primates        | <i>Pan troglodytes</i>            |                 | Prado-Martinez et al. 2013                    | Prado-Martinez et al. 2013                                 |
| Primates        | <i>Pongo abelii</i>               |                 | Prado-Martinez et al. 2013                    | Prado-Martinez et al. 2013                                 |
| Primates        | <i>Pongo pygmaeus</i>             |                 | Prado-Martinez et al. 2013                    | Prado-Martinez et al. 2013                                 |
| Primates        | <i>Saimiri boliviensis</i>        | Genbank         | XM_003931264.1                                | XM_003921214.1                                             |
| Proboscidea     | <i>Loxodonta africana</i>         | Genbank         | XM_003414641.1                                | NW_003573425.1                                             |
| Proboscidea     | <i>Mammuthus sp.</i>              |                 | Buckley et al. 2011 <sup>11</sup>             | Buckley et al. 2011 <sup>11</sup>                          |
| Proboscidea     | <i>Mastodon sp.</i>               |                 | Buckley et al. 2011                           | Buckley et al. 2011                                        |
| Rodentia        | <i>Cavia porcellus</i>            | Genbank         | XM_003466865.2                                | XM_003474996.2                                             |
| Rodentia        | <i>Chinchilla lanigera</i>        | Genbank         | XM_005394176.1                                | XM_005388041.1                                             |
| Rodentia        | <i>Dipodomys ordii</i>            | ENSEMBL         | ENSDORG00000013502                            | ENSDORG00000003027                                         |
| Rodentia        | <i>Cricetulus griseus</i>         | Genbank         | XM_003503960.1                                | XP_003497018                                               |
| Rodentia        | <i>Mesocricetus auratus</i>       | Genbank         | XM_005075850.1                                | XM_005082899.1                                             |
| Rodentia        | <i>Ictidomys tridecemlineatus</i> | Genbank         | XM_005321944.1                                | XM_005331821.1                                             |
| Rodentia        | <i>Jaculus jaculus</i>            | Genbank         | XM_004655568.1                                | XM_004656219.1                                             |
| Rodentia        | <i>Mus musculus</i>               | Genbank         | NM_007742.3                                   | NM_007743.2                                                |

|               |                                 |                 |                |                |
|---------------|---------------------------------|-----------------|----------------|----------------|
| Rodentia      | <i>Rattus norvegicus</i>        | Genbank         | NM_053304.1    | NM_053356.1    |
| Rodentia      | <i>Octodon degus</i>            | Genbank         | XM_004633633.1 | XM_004632623.1 |
| Scandentia    | <i>Tupaia chinensis</i>         | Genbank/UniProt | XM_006166190.1 | L9JEW6         |
| Sirenia       | <i>Trichechus manatus</i>       | Genbank         | XM_004377939.1 | XM_004386146.1 |
| Tubulidentata | <i>Orycteropus afer</i>         | Genbank         | XM_007941916.1 | XM_007939805.1 |
| Tubulidentata | <i>Orycteropus afer</i> (MS/MS) |                 | This study     | This study     |
| Litopterna    | <i>Macrauchenia patachonica</i> |                 | This study     | This study     |
| Notoungulata  | <i>Toxodon platensis</i>        |                 | This study     | This study     |

**Table S3. Divergence dates and fossil constraints for BEAST molecular dating analysis.**

Minimum: hard lower bound, cut off for log normal distribution<sup>12</sup>; Maximum: soft upper bound, 95% of log normal distribution; Log Normal Prior parameters for the BEAST analysis; Fossil Information including current “earliest” anchor fossil, age, and locality. Asterisk indicates constrained nodes were not recovered in free-rate Bayesian analysis.

| Divergence                                                            | Min.  | Max.  | Log Normal Prior                              | Fossil/Other information                                                                        | Ref. |
|-----------------------------------------------------------------------|-------|-------|-----------------------------------------------|-------------------------------------------------------------------------------------------------|------|
| ROOT: Mammal–Bird (Sauropsida–Synapsida)                              | 312.3 | 330.4 | mean="5.75"<br>stdev="1.0"<br>offset="312.3"  | <i>Protoclepsydraps</i> , from Joggins Formation of Nova Scotia                                 | 13   |
| Monotremata–Theria (Theriimorpha–Australosphenida)                    | 162.9 | 191.1 | mean="8.99"<br>stdev="1.0"<br>offset="162.9"  | <i>Amphilestes</i> & <i>Phascolotherium</i> from Stonesfield Slate, Middle Jurassic             | 12   |
| Opossum–Kangaroo/Devil (Ameridelphia–Australidelphia)                 | 61.5  | 71.2  | mean="3.086"<br>stdev="1.0"<br>offset="61.5"  | <i>Khasia</i> , from Early Palaeocene Tiupampa fauna of Bolivia                                 | 12   |
| Afrotheria: Afrosoricida–Paenungulata                                 | 48.4  | 113.0 | mean="20.55"<br>stdev="1.0"<br>offset="48.4"  | <i>Phosphatherium</i> , Ypresian (Early Eocene) proboscidean from Morocco                       | 12   |
| Paenungulata                                                          | 55.6  | 71.2  | mean="4.965"<br>stdev="1.0"<br>offset="55.6"  | <i>Eritherium</i> , minimum age 55.8 +/- 0.2 = 55.6 Mya                                         | 13   |
| Elephantiformes– Elephantimorpha*                                     | 28.3  | 55.6  | mean="8.69"<br>stdev="1.0"<br>offset="28.3"   | <i>Eritreum melakeghebrekristosi</i> dated to 26.8 +/- 1.5 Mya                                  | 47   |
| Proboscidea: <i>Mammuthus–Loxodonta</i> *                             | 6.8   | 23.03 | mean="5.165"<br>stdev="1.0"<br>offset="6.8"   | <i>Loxodonta</i> , from hominid locality in Chad, radiometrically dated between 6.8 and 7.2 Mya | 13   |
| Xenarthra: <i>Choloepus–Dasypus</i>                                   | 58.5  | 71.2  | mean="4.041"<br>stdev="1.0"<br>offset="58.5"  | <i>Riostegotherium</i> from Late Palaeocene dated to 58.7 +/- 0.2 = 58.5 Mya                    | 13   |
| Boreoeutheria: Archontoglires–Laurasiatheria                          | 61.5  | 131.5 | mean="22.27"<br>stdev="1.0"<br>offset="61.5"  | Extinct primate sister taxa such as carpolestids and plesiadapids from Early Palaeocene         | 12   |
| Archontoglires: Primates–Rodentia                                     | 61.5  | 131.5 | mean="22.27"<br>stdev="1.0"<br>offset="61.5"  | Extinct primate sister taxa such as carpolestids and plesiadapids from Early Palaeocene         | 12   |
| Primates: Strepsirrhini–other Primates                                | 55.6  | 65.8  | mean="3.245"<br>stdev="1.0"<br>offset="55.6"  | <i>Altiatlasius</i> , oldest euprimate known from Late Palaeocene of Morocco                    | 12   |
| Anthropoidea: <i>Homo–Saimiri</i> * (Old–New world monkey)            | 33.7  | 65.8  | mean="10.215"<br>stdev="1.0"<br>offset="33.7" | <i>Catopithecus</i> , from Fayum Quarry L-41, Egypt, end of Priabonian                          | 12   |
| Strepsirrhini: <i>Otolemur–Microcebus</i> (Lemuriformes–Lorisiformes) | 33.7  | 55.6  | mean="6.97"<br>stdev="1.0"<br>offset="33.7"   | <i>Karanisia</i> , from Priabonian of Egypt                                                     | 12   |
| Catarrhini: <i>Homo–Macaca</i>                                        | 23.5  | 34.0  | mean="3.343"<br>stdev="1.0"<br>offset="23.5"  | <i>Proconsul</i> , from Late Oligocene (Chattian) Meswa Bridge in Kenya                         | 12   |

|                                                |      |       |                                              |                                                                                                                 |    |
|------------------------------------------------|------|-------|----------------------------------------------|-----------------------------------------------------------------------------------------------------------------|----|
| Hominidea: <i>Homo/Pan-Pongo</i>               | 11.2 | >13.7 | mean="7.16"<br>stdev="1.0"<br>offset="11.2"  | <i>Sivapithecus</i> , from Middle Miocene Chinji Formation, Pakistan                                            | 12 |
| Hominini: <i>Homo-Pan</i>                      | 5.7  | 10.0  | mean="1.37"<br>stdev="1.0"<br>offset="5.7"   | <i>Orrorin</i> , from Late Miocene Lukeino Formation, Kenya                                                     | 12 |
| Glires (Rodentia-Lagomorpha)                   | 61.5 | 131.5 | mean="22.27"<br>stdev="1.0"<br>offset="61.5" | <i>Heomys</i> , stem rodent from Early to Late Palaeocene Doumu Formation, China                                | 12 |
| Lagomorpha: <i>Oryctolagus-Ochotona</i>        | 48.4 | 61.1  | mean="4.043"<br>stdev="1.0"<br>offset="48.4" | Calcanei crown lagomorph from Early Eocene (Ypresian) Cambay Formation, India                                   | 13 |
| Rodentia                                       | 55.6 | 65.8  | mean="3.245"<br>stdev="1.0"<br>offset="55.6" | <i>Sciuravus</i> , from Early Eocene (Wasatchian) Wyoming, USA                                                  | 14 |
| Mouse-clade (Hystricognathi): <i>Cavia-Mus</i> | 52.5 | 58.9  | mean="1.91"<br>stdev="1.0"<br>offset="52.5"  | <i>Birbalomys</i> , from Early Eocene (Ypresian), India.                                                        | 14 |
| Muridae: <i>Mus-Rattus</i>                     | 10.4 | 14.0  | mean="1.145"<br>stdev="1.0"<br>offset="10.4" | <i>Karnimata</i> , from Late Miocene (Tortonian), Kenya                                                         | 14 |
| Myomorpha: <i>Dipodomys-Mus*</i>               | 40.2 | 56.0  | mean="5.03"<br>stdev="1.0"<br>offset="40.2"  | <i>Ulkenulastomys</i> , Early Eocene dipodid from Obayla Svita, Zaysan Basin, Kazakhstan                        | 14 |
| <i>Octodon-Chinchilla*</i>                     | 24.5 | 37.3  | mean="4.075"<br>stdev="1.0"<br>offset="24.5" | <i>Eoviscaccia</i> , oldest chinchillid from Deseadan (Late Oligocene)                                          | 13 |
| Laurasiatheria                                 | 62.5 | 131.5 | mean="21.95"<br>stdev="1.0"<br>offset="62.5" | <i>Protictis</i> , Early Palaeocene carnivoran (Texas)                                                          | 12 |
| Erinaceomorpha-Soricomorpha                    | 61.1 | 84.2  | mean="7.351"<br>stdev="1.0"<br>offset="61.1" | <i>Adunator</i> , oldest erinaceomorph known from Early Eocene (Torrejonian)                                    | 13 |
| Chiroptera: Mega-Microbats                     | 48.6 | 65.8  | mean="5.475"<br>stdev="1.0"<br>offset="48.6" | <i>Icaronycteris</i> , from Late Palaeocene (Clarkforkian Mammal Age, substage 3)                               | 14 |
| Perissodactyla                                 | 55.5 | 61.1  | mean="1.783"<br>stdev="1.0"<br>offset="55.5" | <i>Hyracotherium</i> , beginning of the Eocene                                                                  | 13 |
| <i>Toxodon-Macrauchenia</i>                    | 64.0 | 84.2  | mean="6.905"<br>stdev="1.0"<br>offset="62.5" | <i>Molinodus suarezi</i> and <i>Tiuclaenus minutus</i> . Max. = base of the Campanian (83.5 +/- 0.7 = 84.2 Mya) | 15 |
| Bovidae: <i>Bos-Ovis</i>                       | 18.0 | 28.55 | mean="3.357"<br>stdev="1.0"<br>offset="18.0" | <i>Eotragus</i> , Early Miocene, Western Europe and Pakistan                                                    | 12 |
| Cetartiodactyla                                | 52.5 | 65.8  | mean="4.265"<br>stdev="1.0"<br>offset="52.4" | <i>Himalayacetus</i> , from shallow benthic zone SB8, 52.5 Mya (Ypresian)                                       | 12 |
| Whippomorpha*                                  | 52.5 | 61.1  | mean="2.738"<br>stdev="1.0"<br>offset="52.5" | <i>Himalayacetus</i> , from shallow benthic zone SB8, 52.5 Mya (Ypresian)                                       | 13 |
| Cetacea                                        | 33.8 | 48.8  | mean="4.775"<br>stdev="1.0"<br>offset="33.8" | <i>Llanocetus</i> , from La Meseta Formation, Seymour Island, Antarctica, latest Eocene                         | 13 |
| Carnivora                                      | 37.1 | 56.0  | mean="6.015"<br>stdev="1.0"<br>offset="37.1" | <i>Hesperocyon gregarious</i> , Middle Eocene (Duchesnean) stem canid                                           | 13 |
| Mustelidae-Pinnipedia                          | 33.8 | 48.8  | mean="4.775"<br>stdev="1.0"<br>offset="33.8" | <i>Mustelavus priscus</i> , stem musteloid, first occurrence in latest Eocene                                   | 13 |

## 3. Systematic Commentary

### 3.1 Concepts of SANU Relationships, 1894-2013

The problem of where to put South American native ungulates in the classification of placental mammals may have started with Darwin and Owen, but it continues to the present. The many apparent morphological resemblances between SANUs and modern mammal groups living elsewhere indicated to the Argentinian paleontologist Florentino Ameghino<sup>16</sup> that not only must they be related to SANUs, but that most of their basal lineages originated in South America as well. Authors subsequent to Ameghino have dismissed the majority of these resemblances--and therewith Ameghino's interpretation of their significance--as mere convergences (although some of his inferences may deserve a new look, such as his placing *Macrauchenia* and most of Litopterna within Perissodactyla on the basis of dental and pedal similarities). This effort at systematic housekeeping does not solve, however, the problem of what, if anything, SANUs really are<sup>17-23</sup>. There are many reasons for this, among which are the following: (1) some nominal orders (Pyrotheria, Xenungulata) are known only from early, highly derived forms; (2) even the better known groups (e.g., Notoungulata) are still largely defined by dental attributes; and (3) the initial radiation(s) of SANU taxa evidently occurred very early in the age of placental mammals in South America, the fossil evidence for which is notably meagre.

For this section we have compiled, in table form, all of the major published systematic interpretations regarding how SANUs are related to one other and to other members of Placentalia. Table S4 focuses on recent efforts and emphasizes character data and phylogenetic conclusions, while Table S5 presents the majority of published taxonomic concepts in list form. Resolving relationships for lineages that might have last shared a common ancestor in the earliest Cenozoic or latest Mesozoic is clearly a difficult problem. For ease of reference, however, we recognize a clade, Panperissodactyla define it as the clade uniting all taxa more closely related to crown Perissodactyla than to any other extant placental taxon. For ease of reference, however, a rankless clade Panperissodactyla may be defined as including all taxa more closely related to extant Perissodactyla than to any other extant placental taxon (thus including Notoungulata and Litopterna on the basis of this study and the phylogenetic branching pattern in fig. 2).

**Table S4: Recent hypotheses concerning higher-level phylogenetic affinities of SANUs within Eutheria.\***

| Reference                              | South American ungulate sample                                                                                                                                                                                                                                | Comparative sample                                                                                                                        | Phylogenetic characters                 | Conclusions                                                                                                                                                                                                                                                                                                             | Formal cladistics analysis? | Close affinity to Afrotheria? | Close affinity to pan-Perissodactyla? |
|----------------------------------------|---------------------------------------------------------------------------------------------------------------------------------------------------------------------------------------------------------------------------------------------------------------|-------------------------------------------------------------------------------------------------------------------------------------------|-----------------------------------------|-------------------------------------------------------------------------------------------------------------------------------------------------------------------------------------------------------------------------------------------------------------------------------------------------------------------------|-----------------------------|-------------------------------|---------------------------------------|
| Bergqvist <sup>20</sup>                | Astrapotheria, Litopterna, Notoungulata, Pyrotheria, Xenungulata; also Didolodontidae (South American "condylarths")                                                                                                                                          | North American "condylarths" (Arctocyoniidae, Hyopsodontidae, Meniscotheriidae, Periptychidae, Phenacodontidae)                           | 153 postcranial characters              | 1. Didolodontidae more closely related to Hyopsodontidae and Meniscotheriidae than to SANU orders<br>2. Meridiungulata and Notoungulata are not natural groups<br>3. Astrapotheria and Xenungulata are closely related                                                                                                  | Yes                         | No                            | No                                    |
| de Muizon & Cifelli <sup>52</sup>      | Litopterna (Protolipternidae: <i>Asmithwoodwardia</i> , <i>Miguelsoria</i> , <i>Protolipterna</i> ); also Didolodontidae (e.g., <i>Didolodus</i> ) and Kollpaniinae (Tiupampan "condylarths", e.g., <i>Molinodus</i> , <i>Pucanodus</i> , <i>Tiuclaenus</i> ) | "Zhelestids"; 11 other basal eutherians (e.g., <i>Protungulatum</i> ); North American Mioclaenidae                                        | Dental and tarsal characters            | 1. North American Mioclaenidae and South American Kollpaniinae, Didolodontidae and Litopterna together may constitute a monophyletic clade, Panameriungulata<br>2. "Meridiungulata" containing the 5 orders of SANUs is probably polyphyletic, but Notoungulata may eventually prove to be a member of Panameriungulata | Yes                         | No                            | No                                    |
| Gheerbrant <i>et al.</i> <sup>60</sup> | Litopterna, Notoungulata; also Didolodontidae and Kollpaniinae                                                                                                                                                                                                | Holarctic condylarths (Arctocyoniidae, Mioclaenidae, Phenacodontidae); 1 Palaeogene African ?condylarth ( <i>Abdounodus</i> )             | Dental characters                       | Probable convergence rather than close shared ancestry between Palaeogene African ungulates and SANUs                                                                                                                                                                                                                   | No                          | No                            | No                                    |
| Gelfo <sup>61</sup>                    | Litopterna (Protolipternidae); also Didolodontidae and Kollpaniinae                                                                                                                                                                                           | Basal eutherians (e.g., <i>Protungulatum</i> ); North American Mioclaenidae                                                               | Dental characters                       | Panameriungulata are a natural group, but does not include Protolipternidae                                                                                                                                                                                                                                             | Yes                         | No                            | No                                    |
| Horovitz <sup>22</sup>                 | Astrapotheria ( <i>Astrapotherium</i> ), Litopterna ( <i>Diadiaphorus</i> , <i>Theosodon</i> ), Notoungulata ( <i>Thomashuxleya</i> )                                                                                                                         | 55 ingroup taxa, including representatives of most living eutherian orders, and several groups of Holarctic condylarths; 11 outgroup taxa | 240 postcranial skeletal characters     | 1. SANUs are polyphyletic, in two groups (Litopterna + Notoungulata vs. Astrapotheria)<br>2. SANU groups are nested in two separate Holarctic condylarth clades basal to eutherian crown group comprising carnivores, rodents, lagomorphs, macroscelideans, hyraxes, proboscideans, artiodactyls and perissodactyls     | Yes                         | No                            | No                                    |
| Shockey & Anaya Daza <sup>24</sup>     | Pyrotheria ( <i>Pyrotherium</i> )                                                                                                                                                                                                                             | <i>Arsinoitherium</i>                                                                                                                     | Tarsal characters                       | Pyrotheria share derived tarsal characters with Embrithopoda (Afrotheria), possibly reflecting close shared ancestry                                                                                                                                                                                                    | No                          | Yes                           | No                                    |
| Gelfo <sup>25</sup>                    | Litopterna (Protolipternidae); also Didolodontidae and Kollpaniinae                                                                                                                                                                                           | Basal eutherians (e.g., <i>Protungulatum</i> ); North American Mioclaenidae and Hyopsodontidae                                            | Dental characters                       | Panameriungulata are a natural group, but do not include Protolipternidae                                                                                                                                                                                                                                               | Yes                         | No                            | No                                    |
| Williamson & Carr <sup>26</sup>        | Kollpaniinae (e.g., <i>Molinodus</i> , <i>Pucanodus</i> , <i>Tiuclaenus</i> )                                                                                                                                                                                 | 3 "zhelestids"; 27 Holarctic Mioclaenidae; 1 Palaeogene African ?condylarth ( <i>Abdounodus</i> )                                         | 52 craniodental and skeletal characters | No close relationship between Mioclaenidae and either basal South American ungulates or Palaeogene African ungulates                                                                                                                                                                                                    | Yes                         | No                            | No                                    |



|                                     |                                                                                                                                                      |                                                                    |                                                                                                                                                  |                                                                                                                                                                                                                                                                                                                  |     |      |    |
|-------------------------------------|------------------------------------------------------------------------------------------------------------------------------------------------------|--------------------------------------------------------------------|--------------------------------------------------------------------------------------------------------------------------------------------------|------------------------------------------------------------------------------------------------------------------------------------------------------------------------------------------------------------------------------------------------------------------------------------------------------------------|-----|------|----|
| Agnolin & Chimento <sup>56</sup>    | Bibliographic review of Astrapotheria, Notoungulata, Pyrotheria and Xenungulata                                                                      | Comparison with perceived unambiguous synapomorphies of Afrotheria | 3 dental/skeletal characters (delayed cheek-tooth replacement; >19 thoracolumbar vertebrae; well-defined astragalar cotylar fossa)               | 1. SANUs are polyphyletic<br>2. Astrapotheria and Notoungulata probably closely related to clades within Afrotheria<br>3. Pyrotheria and Xenungulata less clearly related to Afrotheria<br>4. Litopterna probably related to Mioclaenidae, not Afrotheria                                                        | No  | Yes  | No |
| Billet & Martin <sup>73</sup>       | Notoungulata ( <i>Adinotherium</i> , <i>Nesodon</i> , <i>Trachytherus</i> )                                                                          | Comparison with perceived unambiguous synapomorphy of Afrotheria   | Delayed dental eruption                                                                                                                          | No evidence for Afrotheria-like delayed dental eruption in Notoungulata                                                                                                                                                                                                                                          | No  | No   | No |
| Bond <i>et al.</i> <sup>74</sup>    | Astrapotheria, Litopterna, Notoungulata, Pyrotheria, Xenungulata                                                                                     | Comparison with perceived unambiguous synapomorphies of Afrotheria | 3 dental/skeletal characters (delayed dental eruption relative to jaw growth; >19 thoracolumbar vertebrae; presence of astragalar cotylar fossa) | 1. Supposed synapomorphies with Afrotheria have been incorrectly identified in most SANUs<br>2. When present, these characters are highly variable and/or limited to more derived lineages                                                                                                                       | No  | No   | No |
| Kramarz <i>et al.</i> <sup>27</sup> | Astrapotheria, Pyrotheria, Xenungulata                                                                                                               | Comparison with perceived unambiguous synapomorphy of Afrotheria   | Delayed dental eruption                                                                                                                          | No evidence for Afrotheria-like delayed dental eruption in Astrapotheria, Pyrotheria or Xenungulata                                                                                                                                                                                                              | No  | No   | No |
| Lorente <i>et al.</i> <sup>28</sup> | Astrapotheria, Litopterna, Notoungulata, Pyrotheria, Xenungulata                                                                                     | Comparison with perceived unambiguous synapomorphy of Afrotheria   | Presence of astragalar cotylar fossa                                                                                                             | Cotylar fossa is convergently developed in several non-afrothere eutherian and metatherian groups; does not represent synapomorphy linking SANUs and Afrotheria                                                                                                                                                  | No  | No   | No |
| Billet & de Muizon <sup>29</sup>    | Notoungulata (unidentified Late Palaeocene taxon)                                                                                                    | Range of eutherians, including Hyracoidea ( <i>Procavia</i> )      | Petrosal characters                                                                                                                              | Hyracoidea share several probable derived petrosal characters with SANUs                                                                                                                                                                                                                                         | No  | Yes? | No |
| O'Leary <i>et al.</i> <sup>30</sup> | Litopterna ( <i>Protlipterna</i> ), Notoungulata ( <i>Thomashuxleya</i> ), Xenungulata ( <i>Carodnia</i> ); also Didolodontidae ( <i>Didolodus</i> ) | 82 fossil and extant mammal taxa, including 71 eutherian taxa      | 4541 phenomic characters                                                                                                                         | 1. SANUs are polyphyletic, in two groups (Litopterna vs. Notoungulata + Xenungulata)<br>2. Litopterna and <i>Didolodus</i> are nested within Pan-Euungulata, forming part of a condylarth clade that is sister to Perissodactyla + Cetartiodactyla<br>3. Notoungulata + Xenungulata are nested within Afrotheria | Yes | Yes  | No |
| Kramarz & Bond <sup>31</sup>        | Astrapotheria, Pyrotheria, Xenungulata                                                                                                               | Comparison with perceived unambiguous synapomorphy of Afrotheria   | Delayed dental eruption                                                                                                                          | No evidence for Afrotheria-like delayed dental eruption in Astrapotheria, Pyrotheria or Xenungulata                                                                                                                                                                                                              | No  | No   | No |

\*Authors' concepts vary considerably concerning what is or is not a "South American condylarth" vs. "basal litoptern". Allocations in this table are as presented in the cited papers.

**Table S5. Hypotheses of SANU Relationships, Allocations By Clade.**

| SANU Taxon                    | Considered as  |  |  |  | Author                               |
|-------------------------------|----------------|--|--|--|--------------------------------------|
| Suborder <b>Toxodontia</b>    | Order Ungulata |  |  |  | <b>Lydekker (1894)</b> <sup>32</sup> |
| Pachyrucidae                  |                |  |  |  |                                      |
| Typotheriidae                 |                |  |  |  |                                      |
| Toxodontidae                  |                |  |  |  |                                      |
| Suborder <b>Astrapotheria</b> |                |  |  |  |                                      |
| Homalodontotheriidae          |                |  |  |  |                                      |
| Astrapotheriidae              |                |  |  |  |                                      |
| Suborder Lioterna             |                |  |  |  |                                      |
| Protheroheriidae              |                |  |  |  |                                      |
| Macraucheniidae               |                |  |  |  |                                      |

|                    |                |  |  |  |                                      |
|--------------------|----------------|--|--|--|--------------------------------------|
| Archaeopitheciidae | Prosimiae      |  |  |  | <b>Ameghino (1906)</b> <sup>16</sup> |
| Notopitheciidae    |                |  |  |  |                                      |
| Henricosborniidae  |                |  |  |  |                                      |
| Hyopsodontidae     |                |  |  |  |                                      |
| Clenialetidae      |                |  |  |  |                                      |
| Eudiastatidae      |                |  |  |  |                                      |
| Acoelodidae        | Hyracoidea     |  |  |  |                                      |
| Archaeohyracidae   |                |  |  |  |                                      |
| Eutrachytheriidae  | Typotheria     |  |  |  |                                      |
| Hegetotheriidae    |                |  |  |  |                                      |
| Protypotheriidae   |                |  |  |  |                                      |
| Typotheriidae      |                |  |  |  |                                      |
| Nesodontidae       | Toxodontia     |  |  |  |                                      |
| Xotodontidae       |                |  |  |  |                                      |
| Haplodontidae      |                |  |  |  |                                      |
| Toxodontidae       |                |  |  |  |                                      |
| Colpodontidae      | Hippoidea      |  |  |  |                                      |
| Notohippidae       |                |  |  |  |                                      |
| Pantostylopidae    | Condylarthra   |  |  |  |                                      |
| Phenacodontida     |                |  |  |  |                                      |
| Catathleidae       |                |  |  |  |                                      |
| Pantolambdidae     |                |  |  |  |                                      |
| Arctocyoniidae     |                |  |  |  |                                      |
| Hyracotheriidae    | Perissodactyla |  |  |  |                                      |
| Palaeotheriidae    |                |  |  |  |                                      |
| Protheroheriidae   |                |  |  |  |                                      |
| Macraucheniidae    |                |  |  |  |                                      |
| Adiantidae         |                |  |  |  |                                      |
| Carolozitteliidae  | Proboscidea    |  |  |  |                                      |
| Pyrotheriidae      |                |  |  |  |                                      |
| Trigonostylopidae  | Amblypoda      |  |  |  |                                      |
| Albertogaudryidae  |                |  |  |  |                                      |

|                  |            |  |  |  |  |
|------------------|------------|--|--|--|--|
| Astrapotheriidae |            |  |  |  |  |
| Lophodontidae    |            |  |  |  |  |
| Isotemnidae      | Ancylopoda |  |  |  |  |
| Homalotheriidae  |            |  |  |  |  |
| Leontiniidae     |            |  |  |  |  |
| Notostylopidae   | Tillodonta |  |  |  |  |

|                                                                                                     |                    |  |                            |                 |                                    |
|-----------------------------------------------------------------------------------------------------|--------------------|--|----------------------------|-----------------|------------------------------------|
| Familia <i>incertae sedis</i><br><i>Didolodus, Notoprotonia,</i><br><i>Lambdaconus, Proectocion</i> | Order Condylarthra |  |                            | Cohort Ungulata | <b>Osborn (1910)</b> <sup>33</sup> |
| Suborden Homalodotheria                                                                             | Order Toxodontia   |  | Superorder<br>Notoungulata |                 |                                    |
| Notostylopidae                                                                                      |                    |  |                            |                 |                                    |
| Homalodotheriidae                                                                                   |                    |  |                            |                 |                                    |
| Suborden Astrapotheria                                                                              |                    |  |                            |                 |                                    |
| <i>Inc. sed.</i> Albertogaudryidae                                                                  |                    |  |                            |                 |                                    |
| <i>Inc. sed.</i> Isotemnidae                                                                        |                    |  |                            |                 |                                    |
| Astrapotheriidae                                                                                    |                    |  |                            |                 |                                    |
| Suborden Toxodontia                                                                                 |                    |  |                            |                 |                                    |
| <i>Inc. sed.</i> Archaeohyracidae                                                                   |                    |  |                            |                 |                                    |
| Toxodontidae                                                                                        |                    |  |                            |                 |                                    |
| Suborden Typotheria                                                                                 |                    |  |                            |                 |                                    |
| Interatheriidae                                                                                     |                    |  |                            |                 |                                    |
| Hegetotheriidae                                                                                     |                    |  |                            |                 |                                    |
| Typotheriidae                                                                                       |                    |  |                            |                 |                                    |
| Protherotheriidae                                                                                   | Order Litopterna   |  |                            |                 |                                    |
|                                                                                                     |                    |  |                            |                 |                                    |
| Macrauchiidae                                                                                       |                    |  |                            |                 |                                    |
| Pyrotheriidae                                                                                       | Order Pyrotheria   |  |                            |                 |                                    |
|                                                                                                     |                    |  |                            |                 |                                    |

|                       |                  |  |  |                 |                                   |
|-----------------------|------------------|--|--|-----------------|-----------------------------------|
| Suborden Toxodonta    | Order Toxodontia |  |  | Cohort Ungulata | <b>Scott (1913)</b> <sup>34</sup> |
| Toxodontidae          |                  |  |  |                 |                                   |
| Notohippidae          |                  |  |  |                 |                                   |
| Leontiniidae          |                  |  |  |                 |                                   |
| Suborden Typotheria   |                  |  |  |                 |                                   |
| Typotheriidae         |                  |  |  |                 |                                   |
| Interatheriidae       |                  |  |  |                 |                                   |
| Hegetotheriidae       |                  |  |  |                 |                                   |
| Notopithecidae        |                  |  |  |                 |                                   |
| Archaeopithecidae     |                  |  |  |                 |                                   |
| Archaeohyracidae      |                  |  |  |                 |                                   |
| Suborden Entelonychia |                  |  |  |                 |                                   |
| Notostylopidae        |                  |  |  |                 |                                   |
| Isotemnidae           |                  |  |  |                 |                                   |

|                      |                     |  |  |  |  |
|----------------------|---------------------|--|--|--|--|
| Homalodontotheriidae |                     |  |  |  |  |
| Suborder Pyrotheria  |                     |  |  |  |  |
| Pyrotheriidae        |                     |  |  |  |  |
| Astrapotheriidae     | Order Astrapotheria |  |  |  |  |
| Trigonostylopidae    |                     |  |  |  |  |
| Macraucheniidae      | Order Litopterna    |  |  |  |  |
| Proterotheriidae     |                     |  |  |  |  |
| Didolodidae          |                     |  |  |  |  |

|                      |                            |  |                    |          |                                |
|----------------------|----------------------------|--|--------------------|----------|--------------------------------|
| Bunolipternidae      | Suborder Litopterna        |  | Order Ungulata     | Mammalia | Schlosser (1923) <sup>35</sup> |
| Macraucheniidae      |                            |  |                    |          |                                |
| Proterotheriidae     |                            |  |                    |          |                                |
| Adianthidae          |                            |  |                    |          |                                |
| Pyrotheria           | Suborder Amblypoda         |  |                    |          |                                |
| Notopithecidae       | Suborder Typotheria        |  | Order Notoungulata |          |                                |
| Interatheriidae      |                            |  |                    |          |                                |
| Hegetotheriidae      |                            |  |                    |          |                                |
| Typotheriidae        |                            |  |                    |          |                                |
| Archaeopithecidae    |                            |  |                    |          |                                |
| Archaeohyracidae     |                            |  |                    |          |                                |
| Notohippidae         | Suborder Toxodontia        |  |                    |          |                                |
| Nesodontidae         |                            |  |                    |          |                                |
| Toxodontidae         |                            |  |                    |          |                                |
| Arctostylopidae      | Suborder Entelonychia      |  |                    |          |                                |
| Notostylopidae       |                            |  |                    |          |                                |
| Isotemnidae          |                            |  |                    |          |                                |
| Leontiniidae         |                            |  |                    |          |                                |
| Homalodontotheriidae |                            |  |                    |          |                                |
| Trigonostylopidae    | Suborder Astrapotherioidea |  |                    |          |                                |
| Albertogaudryidae    |                            |  |                    |          |                                |
| Astrapotheriidae     |                            |  |                    |          |                                |

|                    |                        |  |                    |          |                              |
|--------------------|------------------------|--|--------------------|----------|------------------------------|
| Didolodontidae     | Order Condylarthra     |  |                    | Mammalia | Simpson (1934) <sup>36</sup> |
| Macraucheniidae    | Order Litopterna       |  |                    |          |                              |
| Proterotheriidae   |                        |  |                    |          |                              |
| Arctostylopidae    | Suborder Notioprogonia |  | Order Notoungulata |          |                              |
| Henricosborniidae  |                        |  |                    |          |                              |
| Notostylopidae     |                        |  |                    |          |                              |
| Isotemnidae        | Suborder Entelonychia  |  |                    |          |                              |
| Homalodootheriidae |                        |  |                    |          |                              |
| Notohippidae       | Suborder Toxodontia    |  |                    |          |                              |
| Toxodontidae       |                        |  |                    |          |                              |
| ?Leontiniidae      |                        |  |                    |          |                              |
| Notopithecidae     | Suborder Typotheria    |  |                    |          |                              |

|                   |                                |  |                        |  |  |
|-------------------|--------------------------------|--|------------------------|--|--|
| Interatheriidae   |                                |  |                        |  |  |
| Typotheriidae     |                                |  |                        |  |  |
| ?Archaeohyracidae |                                |  |                        |  |  |
| ?Acoelodidae      |                                |  |                        |  |  |
| Astrapotheriidae  | Suborden<br>Astrapotherioidea  |  | Order<br>Astrapotheria |  |  |
| Trigonostylopidae | Suborden<br>Trigonostylopoidea |  |                        |  |  |
| Pyrotheriidae     | Order Pyrotheria               |  |                        |  |  |

|                     |                                |  |                        |                             |                                     |
|---------------------|--------------------------------|--|------------------------|-----------------------------|-------------------------------------|
| Didolodontidae      | Order Condylarthra             |  |                        | Superorder<br>Protoungulata | <b>Simpson (1945)</b> <sup>17</sup> |
| Protheriidae        | Order Litopterna               |  |                        |                             |                                     |
| Macraucheniidae     |                                |  |                        |                             |                                     |
| Arctostylopidae     | Suborden<br>Notioprogonia      |  | Order<br>Notoungulata  |                             |                                     |
| Henricosborniidae   |                                |  |                        |                             |                                     |
| Notostylopidae      |                                |  |                        |                             |                                     |
| Oldfieldthomasiidae | Suborden Toxodontia            |  |                        |                             |                                     |
| Archaeopitheciidae  |                                |  |                        |                             |                                     |
| Archaeohyracidae    |                                |  |                        |                             |                                     |
| Isotemnidae         |                                |  |                        |                             |                                     |
| Homalodotheriidae   |                                |  |                        |                             |                                     |
| Leontiniidae        |                                |  |                        |                             |                                     |
| Notohippidae        |                                |  |                        |                             |                                     |
| Toxodontidae        |                                |  |                        |                             |                                     |
| Interatheriidae     | Suborden Typotheria            |  |                        |                             |                                     |
| Mesotheriidae       |                                |  |                        |                             |                                     |
| Hegetotheriidae     | Suborden<br>Hegetotheria       |  |                        |                             |                                     |
| Trigonostylopidae   | Suborden<br>Trigonostylopoidea |  | Order<br>Astrapotheria |                             |                                     |
| Astrapotheriidae    | Suborden<br>Astrapotherioidea  |  |                        |                             |                                     |
| Pyrotheriidae       | Order Pyrotheria               |  |                        | Superorder<br>Paenungulata  |                                     |

|                    |                            |  |  |                        |                                     |
|--------------------|----------------------------|--|--|------------------------|-------------------------------------|
| Litopterna         | Mirorder<br>Meridiungulata |  |  | Grandorder<br>Ungulata | <b>McKenna (1975)</b> <sup>37</sup> |
| Notoungulata       |                            |  |  |                        |                                     |
| Astrapotheria      |                            |  |  |                        |                                     |
| Trigonostylopoidea |                            |  |  |                        |                                     |
| Xenungulata        |                            |  |  |                        |                                     |
| Pyrotheria         |                            |  |  |                        |                                     |

|                |                    |                                |  |  |                                   |
|----------------|--------------------|--------------------------------|--|--|-----------------------------------|
| Astrapotheria  | Tachytelic lineage | Arctocyonid<br>ancestral stock |  |  | <b>Soria (1989)</b> <sup>38</sup> |
| Notoungulata   |                    |                                |  |  |                                   |
| Xenungulata    |                    |                                |  |  |                                   |
| Pyrotheria     |                    |                                |  |  |                                   |
| ?Notopterna    |                    |                                |  |  |                                   |
| Didolodontidae | Bradytelic lineage |                                |  |  |                                   |
| Litopterna     |                    |                                |  |  |                                   |

|                           |                   |  |  |  |                                   |
|---------------------------|-------------------|--|--|--|-----------------------------------|
| Dinocerata                | Uintatheriomorpha |  |  |  | <b>Lucas (1993)</b> <sup>39</sup> |
| Pyrotheria (+Xenungulata) |                   |  |  |  |                                   |

|                     |                          |                       |                            |                        |                                                  |
|---------------------|--------------------------|-----------------------|----------------------------|------------------------|--------------------------------------------------|
| Didolodontidae      | Order Condylarthra       |                       |                            | Grandorder<br>Ungulata | <b>McKenna and Bell<br/>(1997)</b> <sup>21</sup> |
| Mioclaenidae        |                          |                       |                            |                        |                                                  |
| Perutheriidae       |                          |                       | Mirorder<br>Meridiungulata |                        |                                                  |
| Protolipternidae    | Order Litopterna         |                       |                            |                        |                                                  |
| Macraucheniiidae    |                          |                       |                            |                        |                                                  |
| Notonychopidae      |                          |                       |                            |                        |                                                  |
| Adianthidae         |                          |                       |                            |                        |                                                  |
| Protheroheriidae    |                          |                       |                            |                        |                                                  |
| Henricosbornidae    | Suorder<br>Notioprogonia | Order<br>Notoungulata |                            |                        |                                                  |
| Notostylopidae      |                          |                       |                            |                        |                                                  |
| Isotemnidae         | Suborder Toxodontia      |                       |                            |                        |                                                  |
| Leontiniidae        |                          |                       |                            |                        |                                                  |
| Notohippidae        |                          |                       |                            |                        |                                                  |
| Toxodontidae        |                          |                       |                            |                        |                                                  |
| Homalodotheriidae   |                          |                       |                            |                        |                                                  |
| Archaeopitheciidae  | Suborder Typotheria      |                       |                            |                        |                                                  |
| Oldfieldthomasiidae |                          |                       |                            |                        |                                                  |
| Interatheriidae     |                          |                       |                            |                        |                                                  |
| Campanorciidae      |                          |                       |                            |                        |                                                  |
| Mesotheriidae       |                          |                       |                            |                        |                                                  |
| Archaeohyracidae    | Suborder<br>Hegetotheria |                       |                            |                        |                                                  |
| Hegetotheriidae     |                          |                       |                            |                        |                                                  |
| Eoastrapostylopidae | Order Astrapotheria      |                       |                            |                        |                                                  |
| Trigonostylopidae   |                          |                       |                            |                        |                                                  |
| Astrapotheriidae    |                          |                       |                            |                        |                                                  |
| Carodniidae         | Order Xenungulata        |                       |                            |                        |                                                  |
| Pyrotheriidae       | Order Pyrotheria         |                       |                            |                        |                                                  |

### 3.2 50% Majority Rule Bayesian Consensus Tree (Main Text Fig. 2): Comparison to Results of Other Recent Investigations

The tree depicted in fig. 2 in the main text was constructed by analysing all trees in the posterior distribution of trees (excluding those generated during burn-in; see Methods). Nodes with less than 50% support are shown as polytomies. There are some anomalies in our results in comparison to recent large-scale genomic, metagenomic, and morphological (or phenomic) analyses of placental mammals and commentaries thereon<sup>14,30,40–45</sup> (e.g., positions of Scandentia, *Heterocephalus* and *Mammut*; relative positions of *Macropus*, *Monodelphis* and *Sarcophilus* within Marsupialia, and of felids, ursoids and pinnipeds within Carnivora). These are probably mostly due to the limitations of collagen sequence data, although some poorly resolved nodes in this study have also proven problematic in other recent analyses (e.g., position of echolocating Chiroptera vis-à-vis Primates, relationships within Paenungulata). Missing taxa, gene lineage sorting, as well as atypical rates of molecular evolution or selection acting on the protein sequences may have additionally affected phylogenetic resolution.

Basal diversification within the Placentalia is a historically unstable and debated node; recent papers have favoured one or another of three different clades in the basal position (Afrotheria vs. Xenarthra vs. Atlantogenata [Afrotheria + Xenarthra])<sup>14,45</sup>. These clades have sometimes been recovered as an unresolved trichotomy<sup>41</sup>, although some genomic analyses e.g. <sup>14,30</sup> have identified either Xenarthra (branches shaded olive) or Atlantogenata rather than Afrotheria (dark brown) as the sister of other Placentalia, in contrast to our portrayal (for recent discussion, see<sup>46</sup>. Extant Laurasiatheria (shades of green and blue) and Euarchontoglires (red, pink, orange, light brown) form a well-supported clade equivalent to Boreoeutheria. Xenarthra is internally organized as expected, but there is a trichotomy at the base of weakly-supported Afrotheria (0.64). Afroinsectiphilia<sup>43</sup> was not recovered, and *Orycteropus* and Macroscelidea (*Elephantulus*) form a clade that does not include either Chrysochloridae (*Chrysochloris*) or Tenrecidae (*Echinops*), which group separately (for choice of ranks, see<sup>47</sup>). Lipotyphla (dark green) stands as sister to other laurasiatheres grouped in another weakly-supported trichotomy (0.56) consisting of Carnivora, Chiroptera, and Euungulata (Perissodactyla + Artiodactyla).

Euungulata as currently defined is supported by several different data sets<sup>13,30,48–50</sup>. Here it receives only marginal support (0.64), and the failure to recover Whippomorpha (Cetacea + Hippopotamidae) within Artiodactyla, even though other relationships are plausibly resolved, is problematic. By contrast, within crown Perissodactyla, Hippomorpha (horses, asses, zebras) and Ceratomorpha (rhinos, tapirs) were recovered with fully expected contents and relationships. The collagen sequence of the test fossil, *Equus* sp. MACN Pv 5719 from the latest Pleistocene locality of Tapalqué, proved to be nearly identical to that of modern *Equus caballus*. This was expected, and gives additional credibility to sequence information gained from fossils of similar age and taphonomic history. Further, our protein result is consistent with ancient DNA results showing that (with the exception of *Onohippidion*) the Pleistocene horses of South America had not diverged greatly from their North American forebears at the time of their extinction<sup>51</sup>.

As noted in the main text, the strongly supported monophyletic clade containing *Toxodon* and *Macrauchenia* is placed immediately next to crown Perissodactyla in all trees investigated (see inset), and thus our results provide a significant test of certain hypotheses presented by<sup>30</sup> (see also Extended Data Fig 4). With regard to the position of Litopterna, our results are consistent with<sup>30</sup> in that both studies place the latter order within Euungulata. They were able to refine the placement of Litopterna further with phenomic evidence that tended to support the view<sup>52,53</sup> that this SANU order (represented in their analysis by the basal South American taxon *Protolipterna ellipsodontoides*, and also by the South American condylarth family Didolodontidae as represented by *Didolodus multicuspis*) diverged from one of the clades within paraphyletic North American Condylarthra and may therefore be described as part of

stem Euungulata. We do not have proteomic evidence for any members of Condylarthra and therefore cannot stipulate which of the known taxa might be objectively considered (in our preferred terminology) members of Panperissodactyla. However, Palaeogene meniscotheres, phenacodonts, and mioclaenids<sup>52</sup>, among others<sup>26</sup>, are obvious possibilities (Tables S4 & 5). It is also appropriate to note here that it has been claimed that at least one condylarth group, the louisinine apheliscids, might be situated close to the ancestry of at least one afrothere ordinal taxon, Macroscelidea (sengis or elephant shrews)<sup>54,55</sup>. This novel allocation effectively illustrates why Condylarthra is, as has long been suspected, a paraphyletic dustbin replete with taxa of generally primitive aspect that may, after appropriate phylogenetic investigation, turn out to have dramatically different affinities.

Of special significance is the fact that our *Toxodon* results do not support the inference that Notoungulata belongs in or near Afrotheria, as some recent authors<sup>30,56</sup> have contended (Tables S4 & 5). Instead, *Toxodon* consistently groups with *Macrauchenia* and thence with Perissodactyla, indicating that Litopterna and Notoungulata did not diverge within different superorders of placentals but instead evolved exclusively within Laurasiatheria. This being the case, the Palaeocene henricosborniid notoungulate *Simpsonotus praecursor* can no longer be regarded as the oldest taxon within the afrothere clade Pan-Paenungulata as defined by O'Leary *et al.*<sup>30</sup>, Table S2. Because we have no collagen sequence data for the remaining SANU orders (Astrapotheria, Pyrotheria, Xenungulata) we cannot comment on their placement, other than to mention that if they eventually also prove to group with crown Perissodactyla, then panperissodactyls would become one of the largest units within Laurasiatheria.

The recent paper by Beck and Lee<sup>57</sup> is primarily concerned with exploring how different clock models (over)estimate divergence dates in eutherian cladogenesis. However, it is important to cite in the present context because it incorporates in a single study representatives of four of the five nominal SANU orders--Astrapotheria (*Trigonostylops*), Litopterna (*Diadiaphorus*), Pyrotheria (*Pyrotherium*), and Notoungulata (*Simpsonotus*, *Henricosbornia*, and *Thomashuxleya*)--as well as several condylarths (sensu lato) and a stem perissodactyl (*Hyracotherium*). In order to produce trees conforming to well-supported concepts of eutherian relationships in the recent literature, the authors had to run their 421-character matrix using various topological constraints (unconstrained trees are reported in supplementary files). Thus "full/monophyly" was enforced for their combination 'Notoungulata' (*Simpsonotus*, *Henricosbornia*, *Thomashuxleya*, and *Pyrotherium*), meaning that these 4 taxa were constrained to act as a closed monophyletic unit (no external taxa joining internal nodes). Inclusion of *Pyrotherium* in 'Notoungulata' is undefended but presumably reflects the study of Billet<sup>58</sup>. Less rigidly constrained combinations included 'Paenungulata', 'Afrotheria', and 'Laurasiatheria'. *Trigonostylops*, *Diadiaphorus*, and condylarths were unconstrained, but *Hyracotherium* was required to group with 'Laurasiatheria'. In their two preferred trees, 'Notoungulata' was recovered as the sister group of a clade containing *Hyracotherium*, *Diadiaphorus*, and *Trigonostylops*. This agrees with the narrower determination made in the present paper, that notoungulates (sensu stricto) and litopterns have no relationship to afrotheres, but are instead uniquely related to stem perissodactyls. Placement within Laurasiatheria was presumably forced by the constraint on *Hyracotherium*, but the result is certainly plausible overall. Also noteworthy is the fact that unconstrained *Periptychus*, *Mioclaenus*, and South American condylarths group in a separate clade that is sister to the foregoing, in partial agreement with de Muizon and Cifelli<sup>52</sup>. Finally, their results imply that astrapotheres and litopterns may be more closely related to stem perissodactyls than they are to pyrotheres and notoungulates (sensu stricto), although this may likewise be a consequence of the constraint regime and in any case this inference goes beyond what the matrix was intended to do (Robin Beck, *pers. commun.*, 25/10/14).

Finally, Meredith *et al.*<sup>47</sup> have criticized the "extremely short fuse" model advocated by O'Leary *et al.*<sup>30</sup>, which specified that the conventional superorders of crown placentals emerged within



a few hundred thousand years of the K/Pg event. Morphology-based phylogenies of Placentalia tend to place divergence times of all crown superorders at or near the beginning of the Cenozoic 66 million years ago (Ma)<sup>59</sup>, but molecular investigations usually predict much earlier origins, which obviously allows more time for cladogenesis. A recent example is the paper by Zhou *et al.*<sup>50</sup>, which employed first and second codon positions in multiple gene sets as a basis for estimating phylogenetic relationships. They concluded that the major divergences among laurasiatheres occurred in the Late Cretaceous, not the early Cenozoic as most palaeontological/morphological studies have posited<sup>30,59</sup>. According to Zhou *et al.*<sup>50</sup>, Euungulata diverged during the Campanian (83.6–72.1 Ma), either around the time of the Campanian/Turonian transition ca. 83 Ma (range, 91–76) as indicated by their 97-gene set, or during the later Campanian around 76 Ma (89–66 Ma) based on their 60-gene set. Significantly, this provides a long lead time for cladogenesis within euungulates: Perissodactyla is posited to have originated in the Middle Palaeocene ca. 58 Ma (61–55 Ma) in both gene models, which is only slightly or not at all earlier than the latest Palaeocene/earliest Eocene origin (~56 Ma) favoured in many palaeontological discussions. In addition to various controversial indications that placentals phylogenetically related to euungulates were already present by the end of the Mesozoic<sup>60</sup>, the emerging South American record, combined with the analyses developed in this paper, strongly implies that by the start of the Palaeogene cladogenesis within Panperissodactyla had already led to the separation of the crown clade from some or all SANU lineages, as the next section examines with our molecular dating analysis in BEAST.

### 3.3 Testing Results: Additional Phylogenetic Trees

The positions of several nodes in mammalian phylogeny have not been fully resolved by recent analyses. For example, recent studies<sup>13,14,61</sup> have notably differed for such elements as the placement of Afrotheria, Xenarthra, and Boreoeutheria; whether Scandentia grouped with Glires or Primates; and the branching patterns of clades within Laurasiatheria.

To examine whether differing topologies would have any effect on the position of *Toxodon* and *Macrauchenia*, we performed additional analyses (Extended Data Figures 4 & 5), constraining the nodes to those clades found in<sup>13,14,61</sup>. In Extended Data Figure 5 we depict the run made with the preferred tree presented by O'Leary *et al.*<sup>30</sup> (their fig. 1), with the following nodes constrained: Eutheria, Afrotheria, Xenarthra, Boreoeutheria, Euarchontoglires, Laurasiatheria, Euarchonta, Euungulata, Ferungulata, Scrotifera, with the basal relationship at the root of the placental tree being defined as (Xenarthra (Afrotheria, Boreoeutheria)). Results in this and all the other analyses (not shown) were identical: *Toxodon* and *Macrauchenia* were found to group monophyletically, with 100% posterior probability. Similarly, the panperissodactyl grouping was found for all constrained analyses, with 100% posterior probability. Furthermore, we found that an alternative topology, where *Macrauchenia* and *Toxodon* are constrained to be part of a monophyletic group (SANU+Afrotheria), is significantly less parsimonious than an unconstrained analysis (Templeton test,  $p > 0.0001$ ).

To examine the timings of divergence events, a molecular dating analysis was performed in BEAST<sup>62</sup>. Extended Data Figure 4 shows the dated maximum clade credibility tree from this analysis, which provides a perspective on the estimated divergence times for SANUs in a larger context. Given the limited amount of genetic information utilized to create this tree, extensive commentary is not warranted. For a recent evaluation of issues and methods as they affect divergence dating in mammals in particular, see<sup>63</sup>.

Our divergence estimates indicate that the last common ancestors of Notoungulata + Litopterna and crown Perissodactyla separated during the latter half of the Cretaceous, 89–74 Ma (base of Coniacian to latter part of Campanian). As noted elsewhere, there is no fossil evidence for any of these taxa or their putative ancestors during this interval. By contrast, the estimate for the divergence of ceratomorph and hippomorph perissodactyls (ca. 56–58 Ma, i.e., within the Late Palaeocene) is arguably consistent with the long-standing palaeontological

understanding that crown perissodactyls emerged near the Palaeocene/Eocene transition, presumably from a condylarth ancestry<sup>30,64</sup>.

The two SANU lineages represented in this study, taken as proxies for the orders Litopterna and Notoungulata, are estimated to have diverged ca. 69–64 Ma. Although this interval is not wide, it covers a period between the approximate base of the Maastrichtian (end-Cretaceous) and the middle of the Danian (Early Palaeocene), and thus embraces the K/Pg boundary (66 Ma). The younger age estimate simply replicates the minimum accepted palaeontological ages for both notoungulates and litopterns in South America (see Data Tables S4 & S5). However, it should be emphasized that this datum correlates well with increasing evidence for a broad turnover in both flora and fauna in Patagonia at that time. The Early Palaeocene is the time when the arrival of northern elements first becomes evident, but was perhaps initiated just prior to the K/Pg boundary (see review<sup>65</sup>). Although brief intercontinental landbridge connections, microcontinental collisions, and so forth have been hypothesized in the past to explain why such transfers were concentrated at the very beginning of the Cenozoic, acceptable evidence for a dryland route between the Americas at that time is lacking<sup>66</sup>. Given increasing evidence for filtered dispersal of various mammalian groups over major sea “barriers” in the later Cenozoic, we cannot assume that north-south movements would have been likelier in the Palaeocene than the terminal Mesozoic. On the other hand, if there was a Late Cretaceous interchange of land vertebrates (by whatever means), as new discoveries certainly seem to indicate, it is indeed odd that it apparently did not involve placental mammals<sup>67</sup>.

### 3.4 Darwin, Owen, and Initial Interpretations of SANU Relationships

Charles Darwin began his introduction to *On the Origin of Species*: “When on board H.M.S. ‘Beagle,’ as naturalist, I was much struck with certain facts in the distribution of the inhabitants of South America, and in the geological relations of the present to the past inhabitants of that continent.”<sup>68</sup> Two of these extinct past inhabitants were large mammals described by Richard Owen<sup>69</sup>, the type specimens of which Darwin had collected on the voyage. *Toxodon platensis*, “a part, very perfect, of the head”, he purchased from a rancher in Uruguay “for a few shillings.” Darwin<sup>70</sup>. Darwin also found jaw fragments and teeth of this species in Argentina. *Macrauchenia patachonica* was collected by him in a channel of sandy soil in a sandstone cliff at Port St. Julian, Santa Cruz province, on the coast of Southern Patagonia (see main text fig. 1b). It was his only collection of the species.

Both Darwin and Owen were quite uncertain about the affinities of *Toxodon*. Darwin<sup>71</sup> wrote that he was quite taken aback by

*...the Toxodon, perhaps one of the strangest animals ever discovered: in size it equalled an elephant or megatherium, but the structure of its teeth, as Mr. Owen states, proves indisputably that it was intimately related to the Gnawers, the order which, at the present day, includes most of the smallest quadrupeds: in many details it is allied to the Pachydermata: judging from the position of its eyes, ears, and nostrils, it was probably aquatic, like the Dugong and Manatee, to which it is also allied. How wonderfully are the different Orders, at the present time so well separated, blended together in different points of the structure of the Toxodon!*

More importantly, Darwin soon realized that these gigantic animals might provide clues to his understanding of species formation. His Red Notebook, begun on the voyage in 1836 and continued in 1837 after he reached England, contains his first known notes on evolution, including: “if one species does change into another it must be per saltum - or species may perish.” This follows notes on the relationships between the two living species of rheas in Patagonia and the “extinct Guanaco” (*Macrauchenia*) and the living guanaco<sup>72</sup>. So, as early as 1837, Darwin realized that evolution of species might result from geographical or geological factors.

## References Cited

1. Tonni, E. P., Huarte, R. A., Carbonari, J. E. & Figini, A. J. New radiocarbon chronology for the Guerrero Member of the Luján Formation (Buenos Aires, Argentina): palaeoclimatic significance. *Quat. Int.* **109-110**, 45–48 (2003).
2. Smith, C. I., Chamberlain, A. T., Riley, M. S., Stringer, C. & Collins, M. J. The thermal history of human fossils and the likelihood of successful DNA amplification. *J. Hum. Evol.* **45**, 203–217 (2003).
3. Hijmans, R. J., Cameron, S. E., Parra, J. L., Jones, P. G. & Jarvis, A. Very high resolution interpolated climate surfaces for global land areas. *Int. J. Climatol.* **25**, 1965–1978 (2005).
4. Braconnot, P. *et al.* Results of PMIP2 coupled simulations of the Mid-Holocene and Last Glacial Maximum – Part 1: experiments and large-scale features. *Clim. Past* **3**, 261–277 (2007).
5. Bintanja, R., van de Wal, R. S. W. & Oerlemans, J. Modelled atmospheric temperatures and global sea levels over the past million years. *Nature* **437**, 125–128 (2005).
6. Lindahl, T. & Nyberg, B. Rate of depurination of native deoxyribonucleic acid. *Biochemistry* **11**, 3610–3618 (1972).
7. Allentoft, M. E. *et al.* The half-life of DNA in bone: measuring decay kinetics in 158 dated fossils. *Proc. Biol. Sci.* **279**, 4724–4733 (2012).
8. Consortium, T. I. S. G. *et al.* The sheep genome reference sequence: a work in progress. *Anim. Genet.* **41**, 449–453 (2010).
9. Renfree, M. B. *et al.* Genome sequence of an Australian kangaroo, *Macropus eugenii*, provides insight into the evolution of mammalian reproduction and development. *Genome Biol.* **12**, R81 (2011).
10. Prado-Martinez, J. *et al.* Great ape genetic diversity and population history. *Nature* **499**, 471–475 (2013).
11. Buckley, M., Larkin, N. & Collins, M. Mammoth and mastodon collagen sequences; survival and utility. *Geochim. Cosmochim. Acta* **75**, 2007–2016 (2011).
12. Benton, M. J., Donoghue, P. C. J. & Asher, R. J. in *The Timetree of Life* (eds. Hedges, B. S. & Kumar, S.) 35–86 (Oxford University Press, 2009).
13. Meredith, R. W. *et al.* Impacts of the Cretaceous Terrestrial Revolution and KPg extinction on

- mammal diversification. *Science* **334**, 521–524 (2011).
14. Dos Reis, M. *et al.* Phylogenomic datasets provide both precision and accuracy in estimating the timescale of placental mammal phylogeny. *Proc. Biol. Sci.* **279**, 3491–3500 (2012).
  15. Gelfo, J. N., Goin, F. J., Woodburne, M. O. & Muizon, C. D. E. Biochronological relationships of the Earliest South American Paleogene mammalian faunas. *Palaeontology* **52**, 251–269 (2009).
  16. Ameghino, F. Les formations sédimentaires du Crétacé Supérieur et du Tertiaire de Patagonie. *Anal. Mus. Nac. Buenos Aires* **158**, 1–568 (1906).
  17. Simpson, G. G. The beginning of the age of mammals in South America. (1948).
  18. Szalay, F. S. Constructing primate phylogenies: A search for testable hypotheses with maximum empirical content. *J. Hum. Evol.* **6**, 3–18 (1977).
  19. Cifelli, R. L. in *Mammal Phylogeny* (eds. Szalay, F. S., Novacek, M. J. & McKenna, M. C.) 195–216 (Springer New York, 1993).
  20. Bergqvist, L. P. *Reassociação do pós-cranio as espécies de ungulados da bacia de S.J. de Itaboraí (Paleoceno), estado do Rio de Janeiro, e filogenia dos “Condylarthra” e ungulados sul-americanos com base no pós-cranio.* Porto Alegre, Universidade Federal do Rio Grande do Sul. Doctoral thesis: 1-407 (1996).
  21. McKenna, M. C. & Bell, S. K. *Classification of mammals above the species level.* (Columbia University Press, 1997).
  22. Horovitz, I. Eutherian mammal systematics and the origins of South American ungulates as based on postcranial osteology. *Bull. Cargegie Mus. Nat. Hist* 63–79 (2004).
  23. McKenna, M. C., Wyss, A. R. & Flynn, J. J. Paleogene pseudoglyptodont xenarthrans from Central Chile and Argentine Patagonia. *Am. Mus. Novit.* 1–18 (2006).
  24. Shockey, B. J. & Anaya Daza, F. *Pyrotherium macfaddeni*, sp. nov. (late Oligocene, Bolivia) and the pedal morphology of pyrotheres. *J. Vert. Paleontol.* **24**, 481–488 (2004).
  25. Gelfo, J. N. The “condylarth” *Raulvaccia peligrensis* (Mammalia: Didolodontidae) from the Paleocene of Patagonia, Argentina. *J. Vert. Paleontol.* **27**, 651–660 (2007).
  26. Williamson, T. E. & Carr, T. D. *Bomburia* and *Ellipsodon* (Mammalia: Mioclaenidae) from the Early Paleocene of New Mexico. *J. Paleontol.* **81**, 966–985 (2007).

27. Kramarz, A. G. *et al.* Critical examination of the supposed afrotherian-like delayed dental eruption in astrapotheres, pyrotheres and xenungulates. *IV Congreso Latinoamericano de Paleontología de Vertebrados, San Juan* (2011).
28. Lorente, M. *et al.* The cotylar fossa is not a common synapomorphy to link afrotherian mammals and South American native ungulates. *IV Congreso Latinoamericano de Paleontología de Vertebrados, San Juan* (2011).
29. Billet, G. & de Muizon, C. External and internal anatomy of a petrosal from the late Paleocene of Itaboraí, Brazil, referred to Notoungulata (Placentalia). *J. Vert. Paleontol.* **33**, 455–469 (2013).
30. O’Leary, M. A. *et al.* The placental mammal ancestor and the post-K-Pg radiation of placentals. *Science* **339**, 662–667 (2013).
31. Kramarz, A. & Bond, M. Critical revision of the alleged delayed dental eruption in South American “ungulates.” *Mammalian Biology - Zeitschrift für Säugetierkunde* **79**, 170–175 (2014).
32. Lydekker, R. Contribuciones al conocimiento de los vertebrados fósiles de la Argentina. 1. Observaciones adicionales sobre los ungulados argentinos. *An. Mus. La Plata Paleontología (Taller de publicaciones del Museo, 1894)*.
33. Osborn, H. F. *The Age of Mammals in Europe, Asia and North America*. (The Macmillan Co., New York, 1910).
34. Scott, W. B. *A History of Land Mammals in the Western Hemisphere*. (The Macmillan Co., New York, 1913).
35. Schlosser, M. in *Grundzüge der Paläontologie (Paläozoologie) II. von K.A. Zittel, II. Abteilung Vertebrata. Neuarbeitet* (eds. Broili, F. & Schlosser, M.) 402–689 (MR Oldenbourg, 1923).
36. Simpson, G. G. Provisional classification of extinct South American hoofed mammals. *Amer. Mus. Novitates* **750**, 1–21 (1934).
37. McKenna, M. C. Toward a phylogenetic classification of the Mammalia in *Phylogeny of the Primates: A Multidisciplinary Approach* (eds. Lockett, W. P. & Szalay, F. S.) 21–46 (Plenum Press, New York, 1975).
38. Soria, M. F. Notopterna: un nuevo orden de mamíferos ungulados eógenos de América del Sur. Parte I. Los Amilnedwardsiidae. *Ameghiniana* **25**, 245–258 (1989).

39. Lucas, S. in *Mammal Phylogeny: Placentals* (ed. Szalay F. S., N. M. J.) 182–194 (Springer-Verlag, Berlin, 1993).
40. Beck, R. M. D., Bininda-Emonds, O. R. P., Cardillo, M., Liu, F.-G. R. & Purvis, A. A higher-level MRP supertree of placental mammals. *BMC Evol. Biol.* **6**, 93 (2006).
41. Bininda-Emonds, O. R. P. *et al.* The delayed rise of present-day mammals. *Nature* **446**, 507–512 (2007).
42. Asher, R. J. A web-database of mammalian morphology and a reanalysis of placental phylogeny. *BMC Evol. Biol.* **7**, 108 (2007).
43. Asher, R. J. & Lehmann, T. Dental eruption in afrotherian mammals. *BMC Biol.* **6**, 14 (2008).
44. Spaulding, M., O’Leary, M. A. & Gatesy, J. Relationships of Cetacea (Artiodactyla) among mammals: increased taxon sampling alters interpretations of key fossils and character evolution. *PLoS One* **4**, e7062 (2009).
45. Asher, R. J., Bennett, N. & Lehmann, T. The new framework for understanding placental mammal evolution. *Bioessays* **31**, 853–864 (2009).
46. Teeling, E. C. & Hedges, S. B. Making the impossible possible: rooting the tree of placental mammals. *Mol. Biol. Evol.* **30**, 1999–2000 (2013).
47. Asher, R. J. & Helgen, K. M. Nomenclature and placental mammal phylogeny. *BMC Evol. Biol.* **10**, 102 (2010).
48. Waddell, P. J., Kishino, H. & Ota, R. A phylogenetic foundation for comparative mammalian genomics. *Genome Inform.* **12**, 141–154 (2001).
49. Poulakakis, N. & Stamatakis, A. Recapitulating the evolution of Afrotheria: 57 genes and rare genomic changes (RGCs) consolidate their history. *System. Biodivers.* **8**, 395–408 (2010).
50. Zhou, X. *et al.* Phylogenomic analysis resolves the interordinal relationships and rapid diversification of the laurasiatherian mammals. *Syst. Biol.* **61**, 150–164 (2012).
51. Weinstock, J. *et al.* Evolution, systematics, and phylogeography of Pleistocene horses in the New World: a molecular perspective. *PLoS Biol.* **3**, e241 (2005).
52. De Muizon, C. & Cifelli, R. L. The “condylarths”(archaic Ungulata, Mammalia) from the early Palaeocene of Tiupampa (Bolivia): implications on the origin of the South American ungulates.

*Geodiversitas* **22**, 1–150 (2000).

53. Hunter, J. P. & Janis, C. M. “Garden of Eden” or “Fool’s Paradise”? Phylogeny, dispersal, and the southern continent hypothesis of placental mammal origins. *Paleobiology* **32**, 339–344 (2006).
54. Zack, S. P., Penkrot, T. A., Bloch, J. I. & Rose, K. D. Affinities of “hyopsodontids” to elephant shrews and a Holarctic origin of Afrotheria. *Nature* **434**, 497–501 (2005).
55. Tabuce, R. *et al.* Early Tertiary mammals from North Africa reinforce the molecular Afrotheria clade. *Proc. Biol. Sci.* **274**, 1159–1166 (2007).
56. Agnolin, F. L. & Chimento, N. R. Afrotherian affinities for endemic South American “ungulates.” *Mammalian Biology - Zeitschrift für Säugetierkunde* **76**, 101–108 (2011).
57. Beck, R. M. D. & Lee, M. S. Y. Ancient dates or accelerated rates? Morphological clocks and the antiquity of placental mammals. *Proc. R. Soc. Biol. Sci.* **281**, 20141278 (2014).
58. Billet, G. New Observations on the Skull of Pyrotherium (Pyrotheria, Mammalia) and New Phylogenetic Hypotheses on South American Ungulates. *J. Mamm. Evol.* **17**, 21–59 (2010).
59. Wible, J. R., Rougier, G. W., Novacek, M. J. & Asher, R. J. Cretaceous eutherians and Laurasian origin for placental mammals near the K/T boundary. *Nature* **447**, 1003–1006 (2007).
60. Archibald, J. D. Fossil evidence for a Late Cretaceous origin of “hoofed” mammals. *Science* **272**, 1150–1153 (1996).
61. Song, S., Liu, L., Edwards, S. V. & Wu, S. Resolving conflict in eutherian mammal phylogeny using phylogenomics and the multispecies coalescent model. *Proc. Natl. Acad. Sci. U. S. A.* **109**, 14942–14947 (2012).
62. Drummond, A. J., Suchard, M. A., Xie, D. & Rambaut, A. Bayesian phylogenetics with BEAUti and the BEAST 1.7. *Mol. Biol. Evol.* (2012).
63. Bininda-Emonds, O., Beck, R. & MacPhee, R. in *From Clone to Bone: The Synergy of Morphological and Molecular Tools in Palaeobiology* (eds. Asher, R. J. & Müller, J.) 83–165 (Cambridge University Press, 2012).
64. Rose, K. D. *The Beginning of the Age of Mammals*. (Johns Hopkins University Press, Baltimore, 2006).
65. Wilf, P., Rubén Cúneo, N., Escapa, I. H., Pol, D. & Woodburne, M. O. Splendid and seldom isolated:

- the paleobiogeography of Patagonia. *Ann. Rev. Earth Planet. Sci.* **41**, 561–603 (2013).
66. Gayet, M. A review of some problems associated with the occurrences of fossil vertebrates in South America. *J. South Amer. Earth Sci.* **14**, 131–145 (2001).
  67. Pascual, R. & Ortiz-Jaureguizar, E. The Gondwanan and South American Episodes: two major and unrelated moments in the history of the South American mammals. *J. Mamm. Evol.* **14**, 75–137 (2007).
  68. Darwin, C. *On the origin of species by means of natural selection, or the preservation of favoured races in the struggle for life.* (John Murray, London, 1859).
  69. Owen, R. Fossil Mammalia Part One in *The Zoology of the Voyage of H.M.S. Beagle, under the command of Captain Fitzroy, during the years 1832 to 1836.* (ed. Darwin, C., Smith Elder Co., London, 1840).
  70. Keynes, R.D. *Charles Darwin's Beagle Diary.* (Cambridge University Press, Cambridge, 1988).
  71. Darwin, C. *Journal of Researches into the natural history and geology of the countries visited during the voyage of H.M.S. Beagle round the world, under the Command of Capt. Fitz Roy, R.N. The "Beagle"* (John Murray, London, 1845).
  72. Herbert, S. The red notebook of Charles Darwin. *Bull. Brit. Mus. (Nat. Hist.), Hist. Ser.*, **7**, 1–164 (1980).
  73. Billet, G. & Martin, T. No evidence for an afrotherian-like delayed dental eruption in South American notoungulates. *Naturwissenschaften* **98**, 509–517 (2011).
  74. Bond, M. *et al.* Critical analysis of the alleged characters used to link afrotherian mammals and South American native ungulates. Program and abstracts, XXIV Jornadas Argentinas de Mastozoología, 8–11 November, 2011 (2011).
